# Supplementary material for: Changes in health in the countries of the UK and 150 English Local Authority areas 1990–2016: a systematic analysis for the Global Burden of Disease Study 2016
Source: PubMed Central journal article supplement (PMC6215773; doi:10.1016/s0140-6736(18)32207-4), 2018-11-03
Supplement: mmc1.pdf [file mmc1.pdf]

# THE LANCET

## Supplementary appendix

This appendix formed part of the original submission and has been peer reviewed. We post it as supplied by the authors.

Supplement to: Steel N, Ford JA, Newton JN, et al. Changes in health in the countries of the UK and 150 English Local Authority areas 1990–2016: a systematic analysis for the Global Burden of Disease Study 2016. *Lancet* 2018; published online Oct 24. [http://dx.doi.org/10.1016/S0140-6736\(18\)32207-4](http://dx.doi.org/10.1016/S0140-6736(18)32207-4).

## Appendix

### Title: Changes in health in the countries of the UK and 150 English Local Authority areas 1990–2016: a systematic analysis for the Global Burden of Disease Study 2016

| Contents                                                                                                                                                                                                                                                                                                                           | Page(s) |
|------------------------------------------------------------------------------------------------------------------------------------------------------------------------------------------------------------------------------------------------------------------------------------------------------------------------------------|---------|
| <b>Appendix Table 1:</b> List of data sources used for diabetes across UK countries                                                                                                                                                                                                                                                | 2–6     |
| <b>Appendix Table 2:</b> List of data sources used for chronic obstructive pulmonary disease (COPD) across UK countries                                                                                                                                                                                                            | 7       |
| <b>Appendix Table 3:</b> List of data sources used for low back and neck pain across UK countries                                                                                                                                                                                                                                  | 8–10    |
| <b>Appendix Table 4:</b> List of data sources used for skin conditions across UK countries                                                                                                                                                                                                                                         | 11–17   |
| <b>Appendix Table 5:</b> List of data sources used for depressive disorders across UK countries                                                                                                                                                                                                                                    | 18–20   |
| <b>Appendix Table 6:</b> Correlation coefficients between Upper Tier Local Authority estimates and Index of Multiple Deprivation (IMD) scores for the 20 causes with the highest national burden for years of life lost (YLLs) in England, 2016                                                                                    | 21      |
| <b>Appendix Figure 1.</b> Age-standardised disability-adjusted life years (DALYs) rate per 100,000 population, for the 20 causes with the highest DALY burden in order of decreasing national burden and decreasing Upper Tier Local Authority (UTLA) deprivation (Index of Multiple Deprivation [IMD]), England, both sexes, 2016 | 22–25   |
| <b>Appendix Figure 2:</b> Age-standardised years of life lost (YLLs) rate per 100,000 population, for the 20 causes with the highest national YLL burden in order of decreasing burden and decreasing Upper Tier Local Authority (UTLA) deprivation (Index of Multiple Deprivation [IMD] score), England both sexes, 2016          | 26–29   |
| <b>Appendix Figure 3:</b> Age-standardised years lived with disability (YLDs) rate per 100,000 population for the 20 causes with the highest national YLD burden in order of decreasing burden and decreasing Upper Tier Local Authority (UTLA) deprivation (Index of Multiple Deprivation [IMD]), England, both sexes, 2016       | 30–33   |
| <b>Appendix Figure 4:</b> Attributable risk for age-standardised all-cause years of life lost (YLLs) rate per 100,000 population for nine major risk factors, and Upper Tier Local Authority (UTLA) level Index of Multiple Deprivation (IMD) score, for 150 UTLAs in England, 2016                                                | 34      |
| <b>Appendix Figure 5:</b> Age-standardised attributable risk for all-cause years of life lost (YLLs) rate per 100,000 population in order of decreasing Upper Tier Local Authority (UTLA) deprivation (Index of Multiple Deprivation [IMD]), England, both sexes, 2016                                                             | 35–39   |
| <b>Appendix Figure 6:</b> Population attributable fraction for risk factors for all-cause age-standardised years of life lost (YLLs) rate per 100,000 population per year, in order of decreasing Upper Tier Local Authority (UTLA) deprivation (Index of Multiple Deprivation [IMD]), England, both sexes, 2016                   | 40–44   |
| <b>Appendix Figure 7.</b> Annualised percentage change in all-cause age-standardised years of life lost (YLLs) rate over two time periods (2000-2009 and 2010-2016) by UK country and English Upper Tier Local Authorities (UTLA).                                                                                                 | 45      |
| <b>Appendix Figure 8:</b> Absolute change in death rate per 100,000 population over time since 1990 by age group, UK                                                                                                                                                                                                               | 46      |
| <b>Appendix Figure 9:</b> Absolute change in years of life lost (YLL) rate per 100,000 population over time since 1990 by age group, UK                                                                                                                                                                                            | 47      |
| <b>Appendix Figure 10:</b> Mean annual change in attributable risk for all-cause age-standardised years of life lost (YLLs) rate per 100,000 population over three time periods, 1990-2000, 2000-2010, and 2010-2016 ranked by the highest rate, England                                                                           | 48      |
| <b>Appendix Figure 11:</b> Mean annualised percentage change in all-cause age-standardised years of life lost (YLLs) over three time periods compared to Index of Multiple Deprivation (IMD) score, English Upper Tier Local Authorities (UTLAs) for both sexes combined                                                           | 49      |
| <b>Appendix Figure 12:</b> Mean annualised percentage change in all-cause age-standardised years of life lost (YLLs) rate per 100,000 population for the most affluent 10% and the least affluent 10% Upper Tier Local Authorities (UTLAs), England, both sexes, 1990 to 2016                                                      | 50      |
| <b>Appendix Figure 13:</b> Age standardised years lived with disability (YLDs) rate per 100,000 population for the 10 causes with the highest YLD burden by Global Burden of Disease level, United Kingdom both sexes combined, 2016                                                                                               | 51      |
| <b>Data source identification and adjustment</b>                                                                                                                                                                                                                                                                                   | 52–53   |

**Appendix Table 1:** List of data sources used for diabetes across UK countries

| Citation                                                                                                                                                                                                                                                                                                                                                        | Data type             |
|-----------------------------------------------------------------------------------------------------------------------------------------------------------------------------------------------------------------------------------------------------------------------------------------------------------------------------------------------------------------|-----------------------|
| <b>United Kingdom</b>                                                                                                                                                                                                                                                                                                                                           |                       |
| Joint Health Surveys Unit, University College London and Medical Research Council. Social and Public Health Sciences Unit, Scottish Health Survey, 2003 [computer file]. Colchester, Essex: UK Data Archive [distributor], February 2006. SN: 5318                                                                                                              | Survey                |
| Joint Health Surveys Unit of Social and Community Planning Research and University College London, Health Survey for England, 1994 [computer file]. 4th ed. Colchester, Essex: UK Data Archive [distributor], 26 March 2001. SN: 3640                                                                                                                           | Survey                |
| National Centre for Social Research, University College London Department of Epidemiology and Public Health, Health Survey for England, 1998 [computer file]. 4th ed. Colchester, Essex: UK Data Archive [distributor], 30 November 2002. SN: 4150                                                                                                              | Survey                |
| National Centre for Social Research and University College London. Department of Epidemiology and Public Health, Health Survey for England, 1999 [computer file]. 3rd Edition. Colchester, Essex: UK Data Archive [distributor], February 2002. SN: 4365                                                                                                        | Survey                |
| National Centre for Social Research, University College London Department of Epidemiology and Public Health, Health Survey for England, 2000 [computer file]. Colchester, Essex: UK Data Archive [distributor], 23 April 2002. SN: 4487                                                                                                                         | Survey                |
| National Centre for Social Research and University College London. Department of Epidemiology and Public Health, Health Survey for England, 2003 [computer file]. Colchester, Essex: UK Data Archive [distributor], March 2005. SN: 5098                                                                                                                        | Survey                |
| National Centre for Social Research and University College London. Department of Epidemiology and Public Health, Health Survey for England, 2004 [computer file]. Colchester, Essex: UK Data Archive [distributor], July 2006. SN: 5439                                                                                                                         | Survey                |
| National Centre for Social Research and University College London. Department of Epidemiology and Public Health, Health Survey for England, 2005 [computer file]. Colchester, Essex: UK Data Archive [distributor], July 2007. SN: 5675                                                                                                                         | Survey                |
| National Centre for Social Research and University College London. Department of Epidemiology and Public Health, Health Survey for England, 2006 [computer file]. 4th Edition. Colchester, Essex: UK Data Archive [distributor], July 2011. SN: 5809, <a href="http://dx.doi.org/10.5255/UKDA-SN-5809-1">http://dx.doi.org/10.5255/UKDA-SN-5809-1</a>           | Survey                |
| National Centre for Social Research and University College London. Department of Epidemiology and Public Health, Health Survey for England, 2008 [computer file]. 3rd Edition. Colchester, Essex: UK Data Archive [distributor], July 2011. SN: 6397, <a href="http://dx.doi.org/10.5255/UKDA-SN-6397-1">http://dx.doi.org/10.5255/UKDA-SN-6397-1</a>           | Survey                |
| National Centre for Social Research and University College London. Department of Epidemiology and Public Health, Health Survey for England, 2009 [computer file]. 2nd Edition. Colchester, Essex: UK Data Archive [distributor], July 2011. SN: 6732, <a href="http://dx.doi.org/10.5255/UKDA-SN-6732-1">http://dx.doi.org/10.5255/UKDA-SN-6732-1</a>           | Survey                |
| NatCen Social Research and Royal Free and University College Medical School. Department of Epidemiology and Public Health, Health Survey for England, 2010 [computer file]. 2nd Edition. Colchester, Essex: UK Data Archive [distributor], July 2012. SN: 6986, <a href="http://dx.doi.org/10.5255/UKDA-SN-6986-2">http://dx.doi.org/10.5255/UKDA-SN-6986-2</a> | Survey                |
| NatCen Social Research and University College London. Department of Epidemiology and Public Health, Health Survey for England, 2011 [computer file]. Colchester, Essex: UK Data Archive [distributor], April 2013. SN: 7260, <a href="http://dx.doi.org/10.5255/UKDA-SN-7260-1">http://dx.doi.org/10.5255/UKDA-SN-7260-1</a>                                    | Survey                |
| Sampson MJ, Shepstone L, Greenwood RH, Harvey I, Humphries J, Heyburn PJ, Temple RC, Dole G. An integrated mobile foot and retinal screening programme for people with Type 2 diabetes managed in primary care. <i>Diabet Med.</i> 2002; 19(1): 74-6                                                                                                            | Scientific literature |
| Walters DP, Gatling W, Mullee MA, Hill RD. The prevalence of diabetic distal sensory neuropathy in an English community. <i>Diabet Med.</i> 1992; 9(4): 349-53                                                                                                                                                                                                  | Scientific literature |
| Edmonds M, Boulton A, Buckenham T, Every N, Foster A, Freeman D, Gadsby R, Gibby O, Knowles A, Pooke M, Tovey F, Unwin N, Wolfe J. Report of the Diabetic Foot and Amputation Group. <i>Diabet Med.</i> 1996; 13(9 Suppl 4): S27-42                                                                                                                             | Scientific literature |

|                                                                                                                                                                                                                                                                                                                                                                                                                                |                       |
|--------------------------------------------------------------------------------------------------------------------------------------------------------------------------------------------------------------------------------------------------------------------------------------------------------------------------------------------------------------------------------------------------------------------------------|-----------------------|
| Scottish Centre for Social Research and University College London. Department of Epidemiology and Public Health, Scottish Health Survey, 2008 [computer file]. 2nd Edition. Colchester, Essex: UK Data Archive [distributor], April 2013. SN: 6383, <a href="http://dx.doi.org/10.5255/UKDA-SN-6383-2">http://dx.doi.org/10.5255/UKDA-SN-6383-2</a>                                                                            | Survey                |
| Croxson SC, Burden AC, Bodington M, Botha JL. The prevalence of diabetes in elderly people. <i>Diabet Med.</i> 1991; 8(1): 28-31                                                                                                                                                                                                                                                                                               | Scientific literature |
| Abbott CA, Carrington AL, Ashe H, Bath S, Every LC, Griffiths J, Hann AW, Hussein A, Jackson N, Johnson KE, Ryder CH, Torkington R, Van Ross ERE, Whalley AM, Widdows P, Williamson S, Boulton AJM, North-West Diabetes Foot Care Study. The North-West Diabetes Foot Care Study: incidence of, and risk factors for, new diabetic foot ulceration in a community-based patient cohort. <i>Diabet Med.</i> 2002; 19(5): 377-84 | Scientific literature |
| Canavan RJ, Unwin NC, Kelly WF, Connolly VM. Diabetes- and nondiabetes-related lower extremity amputation incidence before and after the introduction of better organized diabetes foot care: continuous longitudinal monitoring using a standard method. <i>Diabetes Care.</i> 2008; 31(3): 459-63                                                                                                                            | Scientific literature |
| Cohen DL, Neil HA, Thorogood M, Mann JI. A population-based study of the incidence of complications associated with type 2 diabetes in the elderly. <i>Diabet Med.</i> 1991; 8(10): 928-33                                                                                                                                                                                                                                     | Scientific literature |
| Vanderpump MP, Tunbridge WM, French JM, Appleton D, Bates D, Rodgers H, Evans JG, Clark F, Tunbridge F, Young ET. The incidence of diabetes mellitus in an English community: a 20-year follow-up of the Whickham Survey. <i>Diabet Med.</i> 1996; 13(8): 741-7                                                                                                                                                                | Scientific literature |
| Global Lower Extremity Amputation Study Group. Epidemiology of lower extremity amputation in centres in Europe, North America and East Asia. The Global Lower Extremity Amputation Study Group. <i>Br J Surg.</i> 2000; 87(3): 328-37                                                                                                                                                                                          | Scientific literature |
| Schofield CJ, Yu N, Jain AS, Leese GP. Decreasing amputation rates in patients with diabetes-a population-based study. <i>Diabet Med.</i> 2009; 26(8): 773-7                                                                                                                                                                                                                                                                   | Scientific literature |
| Leggetter S, Chaturvedi N, Fuller JH, Edmonds ME. Ethnicity and risk of diabetes-related lower extremity amputation: a population-based, case-control study of African Caribbeans and Europeans in the United Kingdom. <i>Arch Intern Med.</i> 2002; 162(1): 73-8                                                                                                                                                              | Scientific literature |
| Department of Epidemiology and Public Health, University College London, National Centre for Social Research (NatCen). United Kingdom Health Survey for England 2013-2014 - HSCIC                                                                                                                                                                                                                                              | Survey                |
| NatCen Social Research and University College London. Department of Epidemiology and Public Health, Health Survey for England, 2012 [computer file]. Colchester, Essex: UK Data Archive [distributor], April 2014. SN: 7480, <a href="http://dx.doi.org/10.5255/UKDA-SN-7480-1">http://dx.doi.org/10.5255/UKDA-SN-7480-1</a>                                                                                                   | Survey                |
| Department of Epidemiology and Public Health, University College London, National Centre for Social Research (NatCen). United Kingdom Health Survey for England 2012-2013 - HSCIC                                                                                                                                                                                                                                              | Survey                |
| Department of Epidemiology and Public Health, University College London, National Centre for Social Research (NatCen). United Kingdom Health Survey for England 2009-2010 - HSCIC                                                                                                                                                                                                                                              | Survey                |
| Department of Epidemiology and Public Health, University College London, MRC Social and Public Health Sciences Unit, University of Glasgow, Scottish Centre for Social Research (ScotCen). United Kingdom - Scottish Health Survey 2011 - Scottish Government                                                                                                                                                                  | Survey                |
| Department of Epidemiology and Public Health, University College London, MRC Social and Public Health Sciences Unit, University of Glasgow, Scottish Centre for Social Research (ScotCen). United Kingdom - Scottish Health Survey 2010 - Scottish Government                                                                                                                                                                  | Survey                |
| Department of Epidemiology and Public Health, University College London, MRC Social and Public Health Sciences Unit, University of Glasgow, Scottish Centre for Social Research (ScotCen). United Kingdom - Scottish Health Survey 2009 - Scottish Government                                                                                                                                                                  | Survey                |
| NatCen Social Research and University College London. Department of Epidemiology and Public Health, Health Survey for England, 2013 [computer file]. Colchester, Essex: UK Data Archive [distributor], January 2015. SN: 7649, <a href="http://dx.doi.org/10.5255/UKDA-SN-7649-1">http://dx.doi.org/10.5255/UKDA-SN-7649-1</a>                                                                                                 | Survey                |
| Kennon B, Leese GP, Cochrane L, Colhoun H, Wild S, Stang D, Sattar N, Pearson D, Lindsay RS, Morris AD, Livingstone S, Young M, McKnight J, Cunningham S. Reduced incidence of lower-extremity amputations in people with diabetes in Scotland: a nationwide study. <i>Diabetes Care.</i> 2012; 35(12): 2588-90                                                                                                                | Scientific literature |
| Krishnan S, Nash F, Baker N, Fowler D, Rayman G. Reduction in diabetic amputations over 11 years in a defined U.K. population: benefits of multidisciplinary team work and continuous prospective audit. <i>Diabetes Care.</i> 2008; 31(1): 99-101                                                                                                                                                                             | Scientific literature |

|                                                                                                                                                                                                                                                                                                                                                                                                                                 |                       |
|---------------------------------------------------------------------------------------------------------------------------------------------------------------------------------------------------------------------------------------------------------------------------------------------------------------------------------------------------------------------------------------------------------------------------------|-----------------------|
| Morris AD, McAlpine R, Steinke D, Boyle DI, Ebrahim AR, Vasudev N, Stewart CP, Jung RT, Leese GP, MacDonald TM, Newton RW. Diabetes and lower-limb amputations in the community. A retrospective cohort study. DARTS/MEMO Collaboration. Diabetes Audit and Research in Tayside Scotland/Medicines Monitoring Unit. <i>Diabetes Care</i> . 1998; 21(5): 738-43                                                                  | Scientific literature |
| New JP, McDowell D, Burns E, Young RJ. Problem of amputations in patients with newly diagnosed diabetes mellitus. <i>Diabet Med</i> . 1998; 15(9): 760-4                                                                                                                                                                                                                                                                        | Scientific literature |
| Rayman G, Krishnan ST, Baker NR, Wareham AM, Rayman A. Are we underestimating diabetes-related lower-extremity amputation rates? Results and benefits of the first prospective study. <i>Diabetes Care</i> . 2004; 27(8): 1892-6                                                                                                                                                                                                | Scientific literature |
| Crawford F, McCowan C, Dimitrov BD, Woodburn J, Wylie GH, Booth E, Leese GP, Bekker HL, Kleijnen J, Fahey T. The risk of foot ulceration in people with diabetes screened in community settings: findings from a cohort study. <i>QJM</i> . 2011; 104(5): 403-10                                                                                                                                                                | Scientific literature |
| Davies M, Brophy S, Williams R, Taylor A. The prevalence, severity, and impact of painful diabetic peripheral neuropathy in type 2 diabetes. <i>Diabetes Care</i> . 2006; 29(7): 1518-22                                                                                                                                                                                                                                        | Scientific literature |
| Cardwell CR, Carson DJ, Patterson CC. Secular trends, disease maps and ecological analyses of the incidence of childhood onset Type 1 diabetes in Northern Ireland, 1989-2003. <i>Diabet Med</i> . 2007; 24(3): 289-95                                                                                                                                                                                                          | Scientific literature |
| Rangasami JJ, Greenwood DC, McSparran B, Smail PJ, Patterson CC, Waugh NR. Rising incidence of type 1 diabetes in Scottish children, 1984-93. The Scottish Study Group for the Care of Young Diabetics. <i>Arch Dis Child</i> . 1997; 77(3): 210-3                                                                                                                                                                              | Scientific literature |
| Betts PR, Logatchov M, Volkov I, Murphy H, Dombrowskaya N, Borzikh S, Ivanova I, Twyman S, Vartan J. An assessment of paediatric diabetes care in three centres in Russia and in Southampton, UK. The Paediatric Teams in Moscow, Tula, Tambov, Southampton. <i>Diabet Med</i> . 1999; 16(9): 772-8                                                                                                                             | Scientific literature |
| Gatling W, Budd S, Walters D, Mullee MA, Goddard JR, Hill RD. Evidence of an increasing prevalence of diagnosed diabetes mellitus in the Poole area from 1983 to 1996. <i>Diabet Med</i> . 1998; 15(12): 1015-21                                                                                                                                                                                                                | Scientific literature |
| Patterson CC, Carson DJ, Hadden DR. Epidemiology of childhood IDDM in Northern Ireland 1989-1994: low incidence in areas with highest population density and most household crowding. Northern Ireland Diabetes Study Group. <i>Diabetologia</i> . 1996; 39(9): 1063-9                                                                                                                                                          | Scientific literature |
| Metcalfe MA, Baum JD. Incidence of insulin dependent diabetes in children aged under 15 years in the British Isles during 1988. <i>BMJ</i> . 1991; 302(6774): 443-7                                                                                                                                                                                                                                                             | Scientific literature |
| Staines A, Bodansky HJ, Lilley HE, Stephenson C, McNally RJ, Cartwright RA. The epidemiology of diabetes mellitus in the United Kingdom: the Yorkshire Regional Childhood Diabetes Register. <i>Diabetologia</i> . 1993; 36(12): 1282-7                                                                                                                                                                                         | Scientific literature |
| Forouhi NG, Luan J, Hennings S, Wareham NJ. Incidence of Type 2 diabetes in England and its association with baseline impaired fasting glucose: the Ely study 1990-2000. <i>Diabet Med</i> . 2007; 24(2): 200-7                                                                                                                                                                                                                 | Scientific literature |
| Wadsworth E, Shield J, Hunt L, Baum D. Insulin dependent diabetes in children under 5: incidence and ascertainment validation for 1992. <i>BMJ</i> . 1995; 310(6981): 700-3                                                                                                                                                                                                                                                     | Scientific literature |
| Whisman MA. Loneliness and the metabolic syndrome in a population-based sample of middle-aged and older adults. <i>Health Psychol</i> . 2010; 29(5): 550-4                                                                                                                                                                                                                                                                      | Scientific literature |
| <b>England</b>                                                                                                                                                                                                                                                                                                                                                                                                                  |                       |
| Canavan RJ, Unwin NC, Kelly WF, Connolly VM. Diabetes- and nondiabetes-related lower extremity amputation incidence before and after the introduction of better organized diabetes foot care: continuous longitudinal monitoring using a standard method. <i>Diabetes Care</i> . 2008; 31(3): 459-63                                                                                                                            | Scientific literature |
| Vanderpump MP, Tunbridge WM, French JM, Appleton D, Bates D, Rodgers H, Evans JG, Clark F, Tunbridge F, Young ET. The incidence of diabetes mellitus in an English community: a 20-year follow-up of the Whickham Survey. <i>Diabet Med</i> . 1996; 13(8): 741-7                                                                                                                                                                | Scientific literature |
| Global Lower Extremity Amputation Study Group. Epidemiology of lower extremity amputation in centres in Europe, North America and East Asia. The Global Lower Extremity Amputation Study Group. <i>Br J Surg</i> . 2000; 87(3): 328-37                                                                                                                                                                                          | Scientific literature |
| Abbott CA, Carrington AL, Ashe H, Bath S, Every LC, Griffiths J, Hann AW, Hussein A, Jackson N, Johnson KE, Ryder CH, Torkington R, Van Ross ERE, Whalley AM, Widdows P, Williamson S, Boulton AJM. North-West Diabetes Foot Care Study. The North-West Diabetes Foot Care Study: incidence of, and risk factors for, new diabetic foot ulceration in a community-based patient cohort. <i>Diabet Med</i> . 2002; 19(5): 377-84 | Scientific literature |

|                                                                                                                                                                                                                                                                                                                                |                       |
|--------------------------------------------------------------------------------------------------------------------------------------------------------------------------------------------------------------------------------------------------------------------------------------------------------------------------------|-----------------------|
| Staines A, Bodansky HJ, Lilley HE, Stephenson C, McNally RJ, Cartwright RA. The epidemiology of diabetes mellitus in the United Kingdom: the Yorkshire Regional Childhood Diabetes Register. <i>Diabetologia</i> . 1993; 36(12): 1282-7                                                                                        | Scientific literature |
| Croxson SC, Burden AC, Bodington M, Botha JL. The prevalence of diabetes in elderly people. <i>Diabet Med</i> . 1991; 8(1): 28-31                                                                                                                                                                                              | Scientific literature |
| Cohen DL, Neil HA, Thorogood M, Mann JI. A population-based study of the incidence of complications associated with type 2 diabetes in the elderly. <i>Diabet Med</i> . 1991; 8(10): 928-33                                                                                                                                    | Scientific literature |
| Sampson MJ, Shepstone L, Greenwood RH, Harvey I, Humphries J, Heyburn PJ, Temple RC, Dole G. An integrated mobile foot and retinal screening programme for people with Type 2 diabetes managed in primary care. <i>Diabet Med</i> . 2002; 19(1): 74-6                                                                          | Scientific literature |
| Leggetter S, Chaturvedi N, Fuller JH, Edmonds ME. Ethnicity and risk of diabetes-related lower extremity amputation: a population-based, case-control study of African Caribbeans and Europeans in the United Kingdom. <i>Arch Intern Med</i> . 2002; 162(1): 73-8                                                             | Scientific literature |
| Edmonds M, Boulton A, Buckenham T, Every N, Foster A, Freeman D, Gadsby R, Gibby O, Knowles A, Pooke M, Tovey F, Unwin N, Wolfe J. Report of the Diabetic Foot and Amputation Group. <i>Diabet Med</i> . 1996; 13(9 Suppl 4): S27-42                                                                                           | Scientific literature |
| Betts PR, Logatchov M, Volkov I, Murphy H, Dombrowskaya N, Borzikh S, Ivanova I, Twyman S, Vartan J. An assessment of paediatric diabetes care in three centres in Russia and in Southampton, UK. The Paediatric Teams in Moscow, Tula, Tambov, Southampton. <i>Diabet Med</i> . 1999; 16(9): 772-8                            | Scientific literature |
| Walters DP, Gatling W, Mullee MA, Hill RD. The prevalence of diabetic distal sensory neuropathy in an English community. <i>Diabet Med</i> . 1992; 9(4): 349-53                                                                                                                                                                | Scientific literature |
| Gatling W, Budd S, Walters D, Mullee MA, Goddard JR, Hill RD. Evidence of an increasing prevalence of diagnosed diabetes mellitus in the Poole area from 1983 to 1996. <i>Diabet Med</i> . 1998; 15(12): 1015-21                                                                                                               | Scientific literature |
| Joint Health Surveys Unit of Social and Community Planning Research and University College London, Health Survey for England, 1994 [computer file]. 4th ed. Colchester, Essex: UK Data Archive [distributor], 26 March 2001. SN: 3640                                                                                          | Survey                |
| National Centre for Social Research, University College London Department of Epidemiology and Public Health, Health Survey for England, 1998 [computer file]. 4th ed. Colchester, Essex: UK Data Archive [distributor], 30 November 2002. SN: 4150                                                                             | Survey                |
| National Centre for Social Research and University College London. Department of Epidemiology and Public Health, Health Survey for England, 1999 [computer file]. 3rd Edition. Colchester, Essex: UK Data Archive [distributor], February 2002. SN: 4365                                                                       | Survey                |
| National Centre for Social Research and University College London. Department of Epidemiology and Public Health, Health Survey for England, 2003 [computer file]. Colchester, Essex: UK Data Archive [distributor], March 2005. SN: 5098                                                                                       | Survey                |
| National Centre for Social Research and University College London. Department of Epidemiology and Public Health, Health Survey for England, 2004 [computer file]. Colchester, Essex: UK Data Archive [distributor], July 2006. SN: 5439                                                                                        | Survey                |
| NatCen Social Research and University College London. Department of Epidemiology and Public Health, Health Survey for England, 2012 [computer file]. Colchester, Essex: UK Data Archive [distributor], April 2014. SN: 7480, <a href="http://dx.doi.org/10.5255/UKDA-SN-7480-1">http://dx.doi.org/10.5255/UKDA-SN-7480-1</a>   | Survey                |
| Department of Epidemiology and Public Health, University College London, National Centre for Social Research (NatCen). United Kingdom Health Survey for England 2009-2010 - HSCIC                                                                                                                                              | Survey                |
| NatCen Social Research and University College London. Department of Epidemiology and Public Health, Health Survey for England, 2013 [computer file]. Colchester, Essex: UK Data Archive [distributor], January 2015. SN: 7649, <a href="http://dx.doi.org/10.5255/UKDA-SN-7649-1">http://dx.doi.org/10.5255/UKDA-SN-7649-1</a> | Survey                |
| Forouhi NG, Luan J, Hennings S, Wareham NJ. Incidence of Type 2 diabetes in England and its association with baseline impaired fasting glucose: the Ely study 1990-2000. <i>Diabet Med</i> . 2007; 24(2): 200-7                                                                                                                | Scientific literature |
| Wadsworth E, Shield J, Hunt L, Baum D. Insulin dependent diabetes in children under 5: incidence and ascertainment validation for 1992. <i>BMJ</i> . 1995; 310(6981): 700-3                                                                                                                                                    | Scientific literature |
| Whisman MA. Loneliness and the metabolic syndrome in a population-based sample of middle-aged and older adults. <i>Health Psychol</i> . 2010; 29(5): 550-4                                                                                                                                                                     | Scientific literature |

| <b>Scotland</b>                                                                                                                                                                                                                                                                                                                                                        |                       |
|------------------------------------------------------------------------------------------------------------------------------------------------------------------------------------------------------------------------------------------------------------------------------------------------------------------------------------------------------------------------|-----------------------|
| Wadsworth E, Shield J, Hunt L, Baum D. Insulin dependent diabetes in children under 5: incidence and ascertainment validation for 1992. <i>BMJ</i> . 1995; 310(6981): 700-3                                                                                                                                                                                            | Scientific literature |
| Joint Health Surveys Unit, University College London and Medical Research Council. Social and Public Health Sciences Unit, Scottish Health Survey, 2003 [computer file]. Colchester, Essex: UK Data Archive [distributor], February 2006. SN: 5318                                                                                                                     | Survey                |
| Scottish Centre for Social Research and University College London. Department of Epidemiology and Public Health, Scottish Health Survey, 2008 [computer file]. 2nd Edition. Colchester, Essex: UK Data Archive [distributor], April 2013. SN: 6383, <a href="http://dx.doi.org/10.5255/UKDA-SN-6383-2">http://dx.doi.org/10.5255/UKDA-SN-6383-2</a>                    | Survey                |
| Schofield CJ, Yu N, Jain AS, Leese GP. Decreasing amputation rates in patients with diabetes-a population-based study. <i>Diabet Med</i> . 2009; 26(8): 773-7                                                                                                                                                                                                          | Scientific literature |
| Department of Epidemiology and Public Health, University College London, MRC Social and Public Health Sciences Unit, University of Glasgow, Scottish Centre for Social Research (ScotCen). United Kingdom - Scottish Health Survey 2011 - Scottish Government                                                                                                          | Survey                |
| Department of Epidemiology and Public Health, University College London, MRC Social and Public Health Sciences Unit, University of Glasgow, Scottish Centre for Social Research (ScotCen). United Kingdom - Scottish Health Survey 2010 - Scottish Government                                                                                                          | Survey                |
| Department of Epidemiology and Public Health, University College London, MRC Social and Public Health Sciences Unit, University of Glasgow, Scottish Centre for Social Research (ScotCen). United Kingdom - Scottish Health Survey 2009 - Scottish Government                                                                                                          | Survey                |
| Kennon B, Leese GP, Cochrane L, Colhoun H, Wild S, Stang D, Sattar N, Pearson D, Lindsay RS, Morris AD, Livingstone S, Young M, McKnight J, Cunningham S. Reduced incidence of lower-extremity amputations in people with diabetes in Scotland: a nationwide study. <i>Diabetes Care</i> . 2012; 35(12): 2588-90                                                       | Scientific literature |
| Morris AD, McAlpine R, Steinke D, Boyle DI, Ebrahim AR, Vasudev N, Stewart CP, Jung RT, Leese GP, MacDonald TM, Newton RW. Diabetes and lower-limb amputations in the community. A retrospective cohort study. DARTS/MEMO Collaboration. <i>Diabetes Audit and Research in Tayside Scotland/Medicines Monitoring Unit</i> . <i>Diabetes Care</i> . 1998; 21(5): 738-43 | Scientific literature |
| Crawford F, McCowan C, Dimitrov BD, Woodburn J, Wylie GH, Booth E, Leese GP, Bekker HL, Kleijnen J, Fahey T. The risk of foot ulceration in people with diabetes screened in community settings: findings from a cohort study. <i>QJM</i> . 2011; 104(5): 403-10                                                                                                       | Scientific literature |
| Rangasami JJ, Greenwood DC, McSporran B, Smail PJ, Patterson CC, Waugh NR. Rising incidence of type 1 diabetes in Scottish children, 1984-93. The Scottish Study Group for the Care of Young Diabetics. <i>Arch Dis Child</i> . 1997; 77(3): 210-3                                                                                                                     | Scientific literature |
| <b>Wales</b>                                                                                                                                                                                                                                                                                                                                                           |                       |
| Wadsworth E, Shield J, Hunt L, Baum D. Insulin dependent diabetes in children under 5: incidence and ascertainment validation for 1992. <i>BMJ</i> . 1995; 310(6981): 700-3                                                                                                                                                                                            | Scientific literature |
| Davies M, Brophy S, Williams R, Taylor A. The prevalence, severity, and impact of painful diabetic peripheral neuropathy in type 2 diabetes. <i>Diabetes Care</i> . 2006; 29(7): 1518-22                                                                                                                                                                               | Scientific literature |
| <b>Northern Ireland</b>                                                                                                                                                                                                                                                                                                                                                |                       |
| Wadsworth E, Shield J, Hunt L, Baum D. Insulin dependent diabetes in children under 5: incidence and ascertainment validation for 1992. <i>BMJ</i> . 1995; 310(6981): 700-3                                                                                                                                                                                            | Scientific literature |
| Cardwell CR, Carson DJ, Patterson CC. Secular trends, disease maps and ecological analyses of the incidence of childhood onset Type 1 diabetes in Northern Ireland, 1989-2003. <i>Diabet Med</i> . 2007; 24(3): 289-95                                                                                                                                                 | Scientific literature |
| Patterson CC, Carson DJ, Hadden DR. Epidemiology of childhood IDDM in Northern Ireland 1989-1994: low incidence in areas with highest population density and most household crowding. Northern Ireland Diabetes Study Group. <i>Diabetologia</i> . 1996; 39(9): 1063-9                                                                                                 | Scientific literature |

**Appendix Table 2:** List of data sources used for chronic obstructive pulmonary disease (COPD) across UK countries

| Citation                                                                                                                                                                                                                                                                                         | Data type             |
|--------------------------------------------------------------------------------------------------------------------------------------------------------------------------------------------------------------------------------------------------------------------------------------------------|-----------------------|
| <b>United Kingdom</b>                                                                                                                                                                                                                                                                            |                       |
| Swanney MP, Ruppel G, Enright PL, Pedersen OF, Crapo RO, Miller MR, Jensen RL, Falaschetti E, Schouten JP, Hankinson JL, Stocks J, Quanjer PH. Using the lower limit of normal for the FEV1/FVC ratio reduces the misclassification of airway obstruction. <i>Thorax</i> . 2008; 63(12): 1046-51 | Scientific literature |
| <b>England</b>                                                                                                                                                                                                                                                                                   |                       |
| Swanney MP, Ruppel G, Enright PL, Pedersen OF, Crapo RO, Miller MR, Jensen RL, Falaschetti E, Schouten JP, Hankinson JL, Stocks J, Quanjer PH. Using the lower limit of normal for the FEV1/FVC ratio reduces the misclassification of airway obstruction. <i>Thorax</i> . 2008; 63(12): 1046-51 | Scientific literature |
| <b>Scotland</b>                                                                                                                                                                                                                                                                                  |                       |
| Swanney MP, Ruppel G, Enright PL, Pedersen OF, Crapo RO, Miller MR, Jensen RL, Falaschetti E, Schouten JP, Hankinson JL, Stocks J, Quanjer PH. Using the lower limit of normal for the FEV1/FVC ratio reduces the misclassification of airway obstruction. <i>Thorax</i> . 2008; 63(12): 1046-51 | Scientific literature |
| <b>Wales</b>                                                                                                                                                                                                                                                                                     |                       |
| Swanney MP, Ruppel G, Enright PL, Pedersen OF, Crapo RO, Miller MR, Jensen RL, Falaschetti E, Schouten JP, Hankinson JL, Stocks J, Quanjer PH. Using the lower limit of normal for the FEV1/FVC ratio reduces the misclassification of airway obstruction. <i>Thorax</i> . 2008; 63(12): 1046-51 | Scientific literature |
| <b>Northern Ireland</b>                                                                                                                                                                                                                                                                          |                       |
| Swanney MP, Ruppel G, Enright PL, Pedersen OF, Crapo RO, Miller MR, Jensen RL, Falaschetti E, Schouten JP, Hankinson JL, Stocks J, Quanjer PH. Using the lower limit of normal for the FEV1/FVC ratio reduces the misclassification of airway obstruction. <i>Thorax</i> . 2008; 63(12): 1046-51 | Scientific literature |



**Appendix Table 3:** List of data sources used for low back and neck pain across UK countries

| Citation                                                                                                                                                                                                                                                                                                                     | Data type             |
|------------------------------------------------------------------------------------------------------------------------------------------------------------------------------------------------------------------------------------------------------------------------------------------------------------------------------|-----------------------|
| <b>United Kingdom</b>                                                                                                                                                                                                                                                                                                        |                       |
| World Health Organization (WHO). United Kingdom World Health Survey 2004. Geneva, Switzerland: World Health Organization (WHO), 2005                                                                                                                                                                                         | Survey                |
| NatCen Social Research and University College London. Department of Epidemiology and Public Health, Health Survey for England, 2011 [computer file]. Colchester, Essex: UK Data Archive [distributor], April 2013. SN: 7260, <a href="http://dx.doi.org/10.5255/UKDA-SN-7260-1">http://dx.doi.org/10.5255/UKDA-SN-7260-1</a> | Survey                |
| Lacey RJ, Lewis M, Sim J. Presentation of pain drawings in questionnaire surveys: influence on prevalence of neck and upper limb pain in the community. <i>Pain</i> . 2003; 105(1-2): 293-301                                                                                                                                | Scientific literature |
| Palmer KT, Walker-Bone K, Griffin MJ, Syddall H, Pannett B, Coggon D, Cooper C. Prevalence and occupational associations of neck pain in the British population. <i>Scand J Work Environ Health</i> . 2001; 27(1): 49-56                                                                                                     | Scientific literature |
| Sim J, Lacey RJ, Lewis M. The impact of workplace risk factors on the occurrence of neck and upper limb pain: a general population study. <i>BMC Public Health</i> . 2006; 6(1): 234                                                                                                                                         | Scientific literature |
| Thomas E, Peat G, Harris L, Wilkie R, Croft PR. The prevalence of pain and pain interference in a general population of older adults: cross-sectional findings from the North Staffordshire Osteoarthritis Project (NorStOP). <i>Pain</i> . 2004; 110(1-2): 361-8                                                            | Scientific literature |
| Urwin M, Symmons D, Allison T, Brammah T, Busby H, Roxby M, Simmons A, Williams G. Estimating the burden of musculoskeletal disorders in the community: the comparative prevalence of symptoms at different anatomical sites, and the relation to social deprivation. <i>Ann Rheum Dis</i> . 1998; 57(11): 649-55            | Scientific literature |
| Webb R, Brammah T, Lunt M, Urwin M, Allison T, Symmons D. Prevalence and predictors of intense, chronic, and disabling neck and back pain in the UK general population. <i>Spine</i> . 2003; 28(11): 1195-202                                                                                                                | Scientific literature |
| Macfarlane GJ, Beasley M, Jones EA, Prescott GJ, Docking R, Keeley P, McBeth J, Jones GT. The prevalence and management of low back pain across adulthood: Results from a population-based cross-sectional study (the MUSICIAN study). <i>Pain</i> . 2012; 153(1): 27-32                                                     | Scientific literature |
| Docking RE, Fleming J, Brayne C, Zhao J, Macfarlane GJ, Jones GT, Cambridge City over-75s Cohort Study collaboration. Epidemiology of back pain in older adults: prevalence and risk factors for back pain onset. <i>Rheumatology (Oxford)</i> . 2011; 50(9): 1645-53                                                        | Scientific literature |
| Department of Health (United Kingdom), Office for National Statistics (United Kingdom). The Prevalence of Back Pain in Great Britain in 1998. United Kingdom: Department of Health (United Kingdom), 1999                                                                                                                    | Report                |
| Murphy S, Buckle P, Stubbs D. A cross-sectional study of self-reported back and neck pain among English schoolchildren and associated physical and psychological risk factors. <i>Arch Dis Child</i> . 2007; 38(6): 797-804                                                                                                  | Scientific literature |
| Palmer KT, Walsh K, Bendall H, Cooper C, Coggon D. Back pain in Britain: comparison of two prevalence surveys at an interval of 10 years. <i>BMJ</i> . 2000; 320(7249): 1577-8                                                                                                                                               | Scientific literature |
| Zhang L, Zhang W-H, Zhang L, Wang P-Y. Prevalence of overweight/obesity and its associations with hypertension, diabetes, dyslipidemia, and metabolic syndrome: a survey in the suburban area of Beijing, 2007. <i>Obes Facts</i> . 2011; 4(4): 284-9                                                                        | Scientific literature |
| Croft PR, Rigby AS. Socioeconomic influences on back problems in the community in Britain. <i>J Epidemiol Community Health</i> . 1994; 48(2): 166-70                                                                                                                                                                         | Scientific literature |
| Elliott AM, Smith BH, Penny KI, Smith WC, Chambers WA. The epidemiology of chronic pain in the community. <i>Lancet</i> . 1999; 354(9186): 1248-52                                                                                                                                                                           | Scientific literature |
| Watson KD, Papageorgiou AC, Jones GT, Taylor S, Symmons DPM, Silman AJ, Macfarlane GJ. Low back pain in schoolchildren: occurrence and characteristics. <i>Pain</i> . 2002; 97(1-2): 87-92                                                                                                                                   | Scientific literature |
| Harkness EF, Macfarlane GJ, Silman AJ, McBeth J. Is musculoskeletal pain more common now than 40 years ago?: Two population-based cross-sectional studies. <i>Rheumatology (Oxford)</i> . 2005; 44(7): 890-5                                                                                                                 | Scientific literature |
| Papageorgiou AC, Croft PR, Ferry S, Jayson MI, Silman AJ. Estimating the prevalence of low back pain in the general population. Evidence from the South Manchester Back Pain Survey. <i>Spine</i> . 1995; 20(17): 1889-94                                                                                                    | Scientific literature |

|                                                                                                                                                                                                                                                                                                                              |                       |
|------------------------------------------------------------------------------------------------------------------------------------------------------------------------------------------------------------------------------------------------------------------------------------------------------------------------------|-----------------------|
| Walsh K, Cruddas M, Coggon D. Low back pain in eight areas of Britain. <i>J Epidemiol Community Health</i> . 1992; 46(3): 227-30                                                                                                                                                                                             | Scientific literature |
| Wright D, Barrow S, Fisher AD, Horsley SD, Jayson MI. Influence of physical, psychological and behavioural factors on consultations for back pain. <i>Br J Rheumatol</i> . 1995; 34(2): 156-61                                                                                                                               | Scientific literature |
| World Health Organization Regional Office for Europe (EURO-WHO). Health Behaviour in School-aged Children: WHO Collaborative Cross-National survey/study (HBSC) 1998                                                                                                                                                         | Survey                |
| World Health Organization Regional Office for Europe (EURO-WHO). Health Behaviour in School-aged Children: WHO Collaborative Cross-National survey/study (HBSC) 1998                                                                                                                                                         | Survey                |
| World Health Organization Regional Office for Europe (EURO-WHO). Health Behaviour in School-aged Children: WHO Collaborative Cross-National survey/study (HBSC) 1998                                                                                                                                                         | Survey                |
| World Health Organization Regional Office for Europe (EURO-WHO). Health Behaviour in School-aged Children: WHO Collaborative Cross-National survey/study (HBSC) 2002                                                                                                                                                         | Survey                |
| World Health Organization Regional Office for Europe (EURO-WHO). Health Behaviour in School-aged Children: WHO Collaborative Cross-National survey/study (HBSC) 2006                                                                                                                                                         | Survey                |
| World Health Organization Regional Office for Europe (EURO-WHO). Health Behaviour in School-aged Children: WHO Collaborative Cross-National survey/study (HBSC) 2009-2010                                                                                                                                                    | Survey                |
| <b>England</b>                                                                                                                                                                                                                                                                                                               |                       |
| Urwin M, Symmons D, Allison T, Brammah T, Busby H, Roxby M, Simmons A, Williams G. Estimating the burden of musculoskeletal disorders in the community: the comparative prevalence of symptoms at different anatomical sites, and the relation to social deprivation. <i>Ann Rheum Dis</i> . 1998; 57(11): 649-55            | Scientific literature |
| Webb R, Brammah T, Lunt M, Urwin M, Allison T, Symmons D. Prevalence and predictors of intense, chronic, and disabling neck and back pain in the UK general population. <i>Spine</i> . 2003; 28(11): 1195-202                                                                                                                | Scientific literature |
| Zhang L, Zhang W-H, Zhang L, Wang P-Y. Prevalence of overweight/obesity and its associations with hypertension, diabetes, dyslipidemia, and metabolic syndrome: a survey in the suburban area of Beijing, 2007. <i>Obes Facts</i> . 2011; 4(4): 284-9                                                                        | Scientific literature |
| Watson KD, Papageorgiou AC, Jones GT, Taylor S, Symmons DPM, Silman AJ, Macfarlane GJ. Low back pain in schoolchildren: occurrence and characteristics. <i>Pain</i> . 2002; 97(1-2): 87-92                                                                                                                                   | Scientific literature |
| Harkness EF, Macfarlane GJ, Silman AJ, McBeth J. Is musculoskeletal pain more common now than 40 years ago?: Two population-based cross-sectional studies. <i>Rheumatology (Oxford)</i> . 2005; 44(7): 890-5                                                                                                                 | Scientific literature |
| Papageorgiou AC, Croft PR, Ferry S, Jayson MI, Silman AJ. Estimating the prevalence of low back pain in the general population. Evidence from the South Manchester Back Pain Survey. <i>Spine</i> . 1995; 20(17): 1889-94                                                                                                    | Scientific literature |
| Wright D, Barrow S, Fisher AD, Horsley SD, Jayson MI. Influence of physical, psychological and behavioural factors on consultations for back pain. <i>Br J Rheumatol</i> . 1995; 34(2): 156-61                                                                                                                               | Scientific literature |
| Docking RE, Fleming J, Brayne C, Zhao J, Macfarlane GJ, Jones GT, Cambridge City over-75s Cohort Study collaboration. Epidemiology of back pain in older adults: prevalence and risk factors for back pain onset. <i>Rheumatology (Oxford)</i> . 2011; 50(9): 1645-53                                                        | Scientific literature |
| Lacey RJ, Lewis M, Sim J. Presentation of pain drawings in questionnaire surveys: influence on prevalence of neck and upper limb pain in the community. <i>Pain</i> . 2003; 105(1-2): 293-301                                                                                                                                | Scientific literature |
| Sim J, Lacey RJ, Lewis M. The impact of workplace risk factors on the occurrence of neck and upper limb pain: a general population study. <i>BMC Public Health</i> . 2006; 6(1): 234                                                                                                                                         | Scientific literature |
| Thomas E, Peat G, Harris L, Wilkie R, Croft PR. The prevalence of pain and pain interference in a general population of older adults: cross-sectional findings from the North Staffordshire Osteoarthritis Project (NorStOP). <i>Pain</i> . 2004; 110(1-2): 361-8                                                            | Scientific literature |
| Murphy S, Buckle P, Stubbs D. A cross-sectional study of self-reported back and neck pain among English schoolchildren and associated physical and psychological risk factors. <i>Arch Dis Child</i> . 2007; 38(6): 797-804                                                                                                  | Scientific literature |
| World Health Organization (WHO). United Kingdom World Health Survey 2004. Geneva, Switzerland: World Health Organization (WHO), 2005                                                                                                                                                                                         | Survey                |
| NatCen Social Research and University College London. Department of Epidemiology and Public Health, Health Survey for England, 2011 [computer file]. Colchester, Essex: UK Data Archive [distributor], April 2013. SN: 7260, <a href="http://dx.doi.org/10.5255/UKDA-SN-7260-1">http://dx.doi.org/10.5255/UKDA-SN-7260-1</a> | Survey                |
| Palmer KT, Walker-Bone K, Griffin MJ, Syddall H, Pannett B, Coggon D, Cooper C. Prevalence and occupational associations of neck pain in the British population. <i>Scand J Work Environ Health</i> . 2001; 27(1): 49-56                                                                                                     | Scientific literature |

|                                                                                                                                                                                                                                                                          |                       |
|--------------------------------------------------------------------------------------------------------------------------------------------------------------------------------------------------------------------------------------------------------------------------|-----------------------|
| World Health Organization Regional Office for Europe (EURO-WHO). Health Behaviour in School-aged Children: WHO Collaborative Cross-National survey/study (HBSC) 2002                                                                                                     | Survey                |
| World Health Organization Regional Office for Europe (EURO-WHO). Health Behaviour in School-aged Children: WHO Collaborative Cross-National survey/study (HBSC) 2006                                                                                                     | Survey                |
| World Health Organization Regional Office for Europe (EURO-WHO). Health Behaviour in School-aged Children: WHO Collaborative Cross-National survey/study (HBSC) 2009-2010                                                                                                | Survey                |
| <b>Scotland</b>                                                                                                                                                                                                                                                          |                       |
| World Health Organization (WHO). United Kingdom World Health Survey 2004. Geneva, Switzerland: World Health Organization (WHO), 2005                                                                                                                                     | Survey                |
| Palmer KT, Walker-Bone K, Griffin MJ, Syddall H, Pannett B, Coggon D, Cooper C. Prevalence and occupational associations of neck pain in the British population. <i>Scand J Work Environ Health</i> . 2001; 27(1): 49-56                                                 | Scientific literature |
| World Health Organization Regional Office for Europe (EURO-WHO). Health Behaviour in School-aged Children: WHO Collaborative Cross-National survey/study (HBSC) 2002                                                                                                     | Survey                |
| World Health Organization Regional Office for Europe (EURO-WHO). Health Behaviour in School-aged Children: WHO Collaborative Cross-National survey/study (HBSC) 2006                                                                                                     | Survey                |
| World Health Organization Regional Office for Europe (EURO-WHO). Health Behaviour in School-aged Children: WHO Collaborative Cross-National survey/study (HBSC) 2009-2010                                                                                                | Survey                |
| Macfarlane GJ, Beasley M, Jones EA, Prescott GJ, Docking R, Keeley P, McBeth J, Jones GT. The prevalence and management of low back pain across adulthood: Results from a population-based cross-sectional study (the MUSICIAN study). <i>Pain</i> . 2012; 153(1): 27-32 | Scientific literature |
| Elliott AM, Smith BH, Penny KI, Smith WC, Chambers WA. The epidemiology of chronic pain in the community. <i>Lancet</i> . 1999; 354(9186): 1248-52                                                                                                                       | Scientific literature |
| World Health Organization Regional Office for Europe (EURO-WHO). Health Behaviour in School-aged Children: WHO Collaborative Cross-National survey/study (HBSC) 1998                                                                                                     | Survey                |
| <b>Wales</b>                                                                                                                                                                                                                                                             |                       |
| World Health Organization (WHO). United Kingdom World Health Survey 2004. Geneva, Switzerland: World Health Organization (WHO), 2005                                                                                                                                     | Survey                |
| Palmer KT, Walker-Bone K, Griffin MJ, Syddall H, Pannett B, Coggon D, Cooper C. Prevalence and occupational associations of neck pain in the British population. <i>Scand J Work Environ Health</i> . 2001; 27(1): 49-56                                                 | Scientific literature |
| World Health Organization Regional Office for Europe (EURO-WHO). Health Behaviour in School-aged Children: WHO Collaborative Cross-National survey/study (HBSC) 2002                                                                                                     | Survey                |
| World Health Organization Regional Office for Europe (EURO-WHO). Health Behaviour in School-aged Children: WHO Collaborative Cross-National survey/study (HBSC) 2006                                                                                                     | Survey                |
| World Health Organization Regional Office for Europe (EURO-WHO). Health Behaviour in School-aged Children: WHO Collaborative Cross-National survey/study (HBSC) 2009-2010                                                                                                | Survey                |
| Macfarlane GJ, Beasley M, Jones EA, Prescott GJ, Docking R, Keeley P, McBeth J, Jones GT. The prevalence and management of low back pain across adulthood: Results from a population-based cross-sectional study (the MUSICIAN study). <i>Pain</i> . 2012; 153(1): 27-32 | Scientific literature |
| Elliott AM, Smith BH, Penny KI, Smith WC, Chambers WA. The epidemiology of chronic pain in the community. <i>Lancet</i> . 1999; 354(9186): 1248-52                                                                                                                       | Scientific literature |
| World Health Organization Regional Office for Europe (EURO-WHO). Health Behaviour in School-aged Children: WHO Collaborative Cross-National survey/study (HBSC) 1998                                                                                                     | Survey                |
| <b>Northern Ireland</b>                                                                                                                                                                                                                                                  |                       |
| World Health Organization (WHO). United Kingdom World Health Survey 2004. Geneva, Switzerland: World Health Organization (WHO), 2005                                                                                                                                     | Survey                |
| World Health Organization Regional Office for Europe (EURO-WHO). Health Behaviour in School-aged Children: WHO Collaborative Cross-National survey/study (HBSC) 1998                                                                                                     | Survey                |

**Appendix Table 4:** List of data sources used for skin conditions across UK countries

| Citation                                                                                                                                                                                                                                                                                                                                                                                                                                                                                                                                               | Data type             |
|--------------------------------------------------------------------------------------------------------------------------------------------------------------------------------------------------------------------------------------------------------------------------------------------------------------------------------------------------------------------------------------------------------------------------------------------------------------------------------------------------------------------------------------------------------|-----------------------|
| <b>United Kingdom</b>                                                                                                                                                                                                                                                                                                                                                                                                                                                                                                                                  |                       |
| Rea JN, Newhouse ML, Halil T. Skin disease in Lambeth. A community study of prevalence and use of medical care. <i>Br J Prev Soc Med.</i> 1976; 30(2): 107-14                                                                                                                                                                                                                                                                                                                                                                                          | Scientific literature |
| Steele K. Primary dermatological care in general practice. <i>J R Coll Gen Pract.</i> 1984; 34(258): 22-3                                                                                                                                                                                                                                                                                                                                                                                                                                              | Scientific literature |
| Williams H, Stewart A, Von Mutius E, Cookson W, Anderson HR. Is eczema really on the increase worldwide. <i>J Allergy Clin Immunol.</i> 2008; 121(4): 947-954                                                                                                                                                                                                                                                                                                                                                                                          | Scientific literature |
| Mallen CD, Mottram S, Wynne-Jones G, Thomas E. Birth-related exposures and asthma and allergy in adulthood: a population-based cross-sectional study of young adults in North Staffordshire. <i>J Asthma.</i> 2008; 45(4): 309-12                                                                                                                                                                                                                                                                                                                      | Scientific literature |
| Punekar YS, Sheikh A. Establishing the incidence and prevalence of clinician-diagnosed allergic conditions in children and adolescents using routinely collected data from general practices. <i>Clin Exp Allergy.</i> 2009; 39(8): 1209-16                                                                                                                                                                                                                                                                                                            | Scientific literature |
| Schofield JK, Fleming D, Grindlay D, Williams H. Skin conditions are the commonest new reason people present to general practitioners in England and Wales. <i>Br J Dermatol.</i> 2011; 165(5): 1044-50                                                                                                                                                                                                                                                                                                                                                | Scientific literature |
| Ziyab AH, Raza A, Karmaus W, Tongue N, Zhang H, Matthews S, Arshad SH, Roberts G. Trends in eczema in the first 18 years of life: results from the Isle of Wight 1989 birth cohort study. <i>Clin Exp Allergy.</i> 2010; 40(12): 1776-84                                                                                                                                                                                                                                                                                                               | Scientific literature |
| Odhiambo JA, Williams HC, Clayton TO, Robertson CF, Asher MI, ISAAC Phase Three Study Group. Global variations in prevalence of eczema symptoms in children from ISAAC Phase Three. <i>J Allergy Clin Immunol.</i> 2009; 124(6): 1251-1258                                                                                                                                                                                                                                                                                                             | Scientific literature |
| Flohr C, Weiland SK, Weinmayr G, Björkstén B, Bråbäck L, Brunekreef B, Büchele G, Clausen M, Cookson WOC, von Mutius E, Strachan DP, Williams HC, ISAAC Phase Two Study Group. The role of atopic sensitization in flexural eczema: findings from the International Study of Asthma and Allergies in Childhood Phase Two. <i>J Allergy Clin Immunol.</i> 2008; 121(1): 141-147                                                                                                                                                                         | Scientific literature |
| Flohr C, Weinmayr G, Weiland SK, Addo-Yobo E, Annesi-Maesano I, Björkstén B, Bråbäck L, Büchele G, Chico M, Cooper P, Clausen M, El Sharif N, Martinez Gimeno A, Mathur RS, von Mutius E, Morales Suarez-Varela M, Pearce N, Svabe V, Wong GWK, Yu M, Zhong NS, Williams HC, ISAAC Phase Two Study Group. How well do questionnaires perform compared with physical examination in detecting flexural eczema? Findings from the International Study of Asthma and Allergies in Childhood (ISAAC) Phase Two. <i>Br J Dermatol.</i> 2009; 161(4): 846-53 | Scientific literature |
| Anderson HR, Ruggles R, Strachan DP, Austin JB, Burr M, Jeffs D, Standing P, Steriu A, Goulding R. Trends in prevalence of symptoms of asthma, hay fever, and eczema in 12-14 year olds in the British Isles, 1995-2002: questionnaire survey. <i>BMJ.</i> 2004; 329(7464): 489-90                                                                                                                                                                                                                                                                     | Scientific literature |
| Devenny A. Respiratory symptoms and atopy in children in Aberdeen: questionnaire studies of a defined school population repeated over 35 years. <i>BMJ.</i> 2004; 329(7464): 489-90                                                                                                                                                                                                                                                                                                                                                                    | Scientific literature |
| Kuehni CE, Davis A, Brooke AM, Silverman M. Are all wheezing disorders in very young (preschool) children increasing in prevalence?. <i>Lancet.</i> 2001; 357(9271): 1821-5                                                                                                                                                                                                                                                                                                                                                                            | Scientific literature |
| Kwong GNM, Proctor A, Billings C, Duggan R, Das C, Whyte MKB, Powell CVE, Primhak R. Increasing prevalence of asthma diagnosis and symptoms in children is confined to mild symptoms. <i>Thorax.</i> 2001; 312-4                                                                                                                                                                                                                                                                                                                                       | Scientific literature |
| McNeill G, Tagiyeva N, Aucott L, Russell G, Helms PJ. Changes in the prevalence of asthma, eczema and hay fever in pre-pubertal children: a 40-year perspective. <i>Paediatr Perinat Epidemiol.</i> 2009; 23(6): 506-12                                                                                                                                                                                                                                                                                                                                | Scientific literature |
| Shamssain M. Trends in the prevalence and severity of asthma, rhinitis and atopic eczema in 6- to 7- and 13- to 14-yr-old children from the north-east of England. <i>Pediatr Allergy Immunol.</i> 2007; 18(2): 149-53                                                                                                                                                                                                                                                                                                                                 | Scientific literature |
| Garcia-Marcos L, Robertson CF, Ross Anderson H, Ellwood P, Williams HC, Wong GW. Does migration affect asthma, rhinoconjunctivitis and eczema prevalence? Global findings from the international study of asthma and allergies in childhood. <i>Int J Epidemiol.</i> 2014; 43(6): 1846-54                                                                                                                                                                                                                                                              | Scientific literature |

|                                                                                                                                                                                                                                                                                 |                       |
|---------------------------------------------------------------------------------------------------------------------------------------------------------------------------------------------------------------------------------------------------------------------------------|-----------------------|
| Nagel G, Weinmayr G, Flohr C, Kleiner A, Strachan DP. Association of pertussis and measles infections and immunizations with asthma and allergic sensitization in ISAAC Phase Two. <i>Pediatr Allergy Immunol.</i> 2012; 23(8): 737-46                                          | Scientific literature |
| Katebi R, Williams G, Bourke M, Harrison A, Verma A. What factors are associated with the prevalence of atopic symptoms amongst adolescents in Greater Manchester?. <i>Eur J Public Health.</i> 2015; nan                                                                       | Scientific literature |
| Ziyab AH, Karmaus W, Zhang H, Holloway JW, Steck SE, Ewart S, Arshad SH. Allergic sensitization and filaggrin variants predispose to the comorbidity of eczema, asthma, and rhinitis: results from the Isle of Wight birth cohort. <i>Clin Exp Allergy.</i> 2014; 44(9): 1170-8 | Scientific literature |
| Osman M, Tagiyeva N, Wassall HJ, Ninan TK, Devenny AM, McNeill G, Helms PJ, Russell G. Changing trends in sex specific prevalence rates for childhood asthma, eczema, and hay fever. <i>Pediatr Pulmonol.</i> 2007; 42(1): 60-5                                                 | Scientific literature |
| Nevitt GJ, Hutchinson PE. Psoriasis in the community: prevalence, severity and patients' beliefs and attitudes towards the disease. <i>Br J Dermatol.</i> 1996; 135(4): 533-7                                                                                                   | Scientific literature |
| Huerta C, Rivero E, Rodríguez LAG. Incidence and risk factors for psoriasis in the general population. <i>Arch Dermatol.</i> 2007; 143(12): 1559-65                                                                                                                             | Scientific literature |
| Gelfand JM, Weinstein R, Porter SB, Neimann AL, Berlin JA, Margolis DJ. Prevalence and treatment of psoriasis in the United Kingdom: a population-based study. <i>Arch Dermatol.</i> 2005; 141(12): 1537-41                                                                     | Scientific literature |
| Springate DA, Parisi R, Kontopantelis E, Reeves D, Griffiths CE, Ashcroft DM. Incidence, prevalence and mortality of patients with psoriasis: a UK population-based cohort study. <i>Br J Dermatol.</i> 2016; nan                                                               | Scientific literature |
| Gillard SE, Finlay AY. Current management of psoriasis in the United Kingdom: patterns of prescribing and resource use in primary care. <i>Int J Clin Pract.</i> 2005; 59(11): 1260-7                                                                                           | Scientific literature |
| Seminara NM, Abuabara K, Shin DB, Langan SM, Kimmel SE, Margolis D, Troxel AB, Gelfand JM. Validity of The Health Improvement Network (THIN) for the study of psoriasis. <i>Br J Dermatol.</i> 2011; 164(3): 602-9                                                              | Scientific literature |
| World Health Organization Regional Office for Europe (WHO/Europe). European Hospital Morbidity Database 1999-2007. Copenhagen, Denmark: World Health Organization Regional Office for Europe (WHO/Europe)                                                                       | Administrative record |
| World Health Organization (WHO). United Kingdom World Health Survey 2004. Geneva, Switzerland: World Health Organization (WHO), 2005                                                                                                                                            | Survey                |
| Organization for Economic Co-operation and Development (OECD). OECD Health Statistics. Paris, France: Organization for Economic Co-operation and Development (OECD)                                                                                                             | Administrative record |
| Trinity College Dublin. Ireland Longitudinal Study on Ageing 2009-2011. Dublin, Ireland: Irish Social Science Data Archive, University College Dublin                                                                                                                           | Survey                |
| Trinity College Dublin. Ireland Longitudinal Study on Ageing 2012-2013. Dublin, Ireland: Irish Social Science Data Archive, University College Dublin                                                                                                                           | Survey                |
| National Centre for Social Research (NatCen), World Health Organization (WHO). United Kingdom WHO Multi-country Survey Study on Health and Health System Responsiveness 2000-2001. Geneva, Switzerland: World Health Organization (WHO)                                         | Survey                |
| NHS England. United Kingdom - England Hospital Episode Statistics 2003-2007                                                                                                                                                                                                     | Administrative record |
| NHS England. United Kingdom - England Hospital Episode Statistics 2001-2002                                                                                                                                                                                                     | Administrative record |
| NHS England. United Kingdom - England Hospital Episode Statistics 2008-2012                                                                                                                                                                                                     | Administrative record |
| NHS England. United Kingdom - England Hospital Episode Statistics 2013-2014                                                                                                                                                                                                     | Administrative record |
| Department of Health, Social Services and Public Safety (Northern Ireland), Information Centre for Health and Social Care, NHS, NHS England, NHS Health Scotland, NHS Wales. United Kingdom Hospital Patient and Discharge Data 2006                                            | Administrative record |
| Department of Health, Social Services and Public Safety (Northern Ireland), Information Centre for Health and Social Care, NHS, NHS England, NHS Health Scotland, NHS Wales. United Kingdom Hospital Patient and Discharge Data 2012                                            | Administrative record |
| Department of Health, Social Services and Public Safety (Northern Ireland), Information Centre for Health and Social Care, NHS, NHS England, NHS Health Scotland, NHS Wales. United Kingdom Hospital Patient and Discharge Data 2013                                            | Administrative record |

|                                                                                                                                                                                                                                                                                                                                                                                                                                                                                                                                                        |                       |
|--------------------------------------------------------------------------------------------------------------------------------------------------------------------------------------------------------------------------------------------------------------------------------------------------------------------------------------------------------------------------------------------------------------------------------------------------------------------------------------------------------------------------------------------------------|-----------------------|
| Department of Health, Social Services and Public Safety (Northern Ireland), Information Centre for Health and Social Care, NHS, NHS England, NHS Health Scotland, NHS Wales. United Kingdom Hospital Patient and Discharge Data 2014                                                                                                                                                                                                                                                                                                                   | Administrative record |
| Pannell RS, Fleming DM, Cross KW. The incidence of molluscum contagiosum, scabies and lichen planus. <i>Epidemiol Infect.</i> 2005; 133(6): 985-91                                                                                                                                                                                                                                                                                                                                                                                                     | Scientific literature |
| Konstantinou GN, Papadopoulos NG, Tavladaki T, Tsekoura T, Tsilimigaki A, Grattan CEH. Childhood acute urticaria in northern and southern Europe shows a similar epidemiological pattern and significant meteorological influences. <i>Pediatr Allergy Immunol.</i> 2011; 22(1 Pt 1): 36-42                                                                                                                                                                                                                                                            | Scientific literature |
| Margolis DJ, Bilker W, Knauss J, Baumgarten M, Strom BL. The incidence and prevalence of pressure ulcers among elderly patients in general medical practice. <i>Ann Epidemiol.</i> 2002; 12(5): 321-5                                                                                                                                                                                                                                                                                                                                                  | Scientific literature |
| Rea JN, Newhouse ML, Halil T. Skin disease in Lambeth. A community study of prevalence and use of medical care. <i>Br J Prev Soc Med.</i> 1976; 30(2): 107-14                                                                                                                                                                                                                                                                                                                                                                                          | Scientific literature |
| Steele K. Primary dermatological care in general practice. <i>J R Coll Gen Pract.</i> 1984; 34(258): 22-3                                                                                                                                                                                                                                                                                                                                                                                                                                              | Scientific literature |
| Williams H, Stewart A, Von Mutius E, Cookson W, Anderson HR. Is eczema really on the increase worldwide. <i>J Allergy Clin Immunol.</i> 2008; 121(4): 947-954                                                                                                                                                                                                                                                                                                                                                                                          | Scientific literature |
| Mallen CD, Mottram S, Wynne-Jones G, Thomas E. Birth-related exposures and asthma and allergy in adulthood: a population-based cross-sectional study of young adults in North Staffordshire. <i>J Asthma.</i> 2008; 45(4): 309-12                                                                                                                                                                                                                                                                                                                      | Scientific literature |
| Punekar YS, Sheikh A. Establishing the incidence and prevalence of clinician-diagnosed allergic conditions in children and adolescents using routinely collected data from general practices. <i>Clin Exp Allergy.</i> 2009; 39(8): 1209-16                                                                                                                                                                                                                                                                                                            | Scientific literature |
| Schofield JK, Fleming D, Grindlay D, Williams H. Skin conditions are the commonest new reason people present to general practitioners in England and Wales. <i>Br J Dermatol.</i> 2011; 165(5): 1044-50                                                                                                                                                                                                                                                                                                                                                | Scientific literature |
| Ziyab AH, Raza A, Karmaus W, Tongue N, Zhang H, Matthews S, Arshad SH, Roberts G. Trends in eczema in the first 18 years of life: results from the Isle of Wight 1989 birth cohort study. <i>Clin Exp Allergy.</i> 2010; 40(12): 1776-84                                                                                                                                                                                                                                                                                                               | Scientific literature |
| Odhiambo JA, Williams HC, Clayton TO, Robertson CF, Asher MI, ISAAC Phase Three Study Group. Global variations in prevalence of eczema symptoms in children from ISAAC Phase Three. <i>J Allergy Clin Immunol.</i> 2009; 124(6): 1251-1258                                                                                                                                                                                                                                                                                                             | Scientific literature |
| Flohr C, Weiland SK, Weinmayr G, Björkstén B, Bråbäck L, Brunekreef B, Büchele G, Clausen M, Cookson WOC, von Mutius E, Strachan DP, Williams HC, ISAAC Phase Two Study Group. The role of atopic sensitization in flexural eczema: findings from the International Study of Asthma and Allergies in Childhood Phase Two. <i>J Allergy Clin Immunol.</i> 2008; 121(1): 141-147                                                                                                                                                                         | Scientific literature |
| Flohr C, Weinmayr G, Weiland SK, Addo-Yobo E, Annesi-Maesano I, Björkstén B, Bråbäck L, Büchele G, Chico M, Cooper P, Clausen M, El Sharif N, Martinez Gimeno A, Mathur RS, von Mutius E, Morales Suarez-Varela M, Pearce N, Svabe V, Wong GWK, Yu M, Zhong NS, Williams HC, ISAAC Phase Two Study Group. How well do questionnaires perform compared with physical examination in detecting flexural eczema? Findings from the International Study of Asthma and Allergies in Childhood (ISAAC) Phase Two. <i>Br J Dermatol.</i> 2009; 161(4): 846-53 | Scientific literature |
| Anderson HR, Ruggles R, Strachan DP, Austin JB, Burr M, Jeffs D, Standring P, Steriu A, Goulding R. Trends in prevalence of symptoms of asthma, hay fever, and eczema in 12-14 year olds in the British Isles, 1995-2002: questionnaire survey. <i>BMJ.</i> 2004; 1052-3                                                                                                                                                                                                                                                                               | Scientific literature |
| Devenny A. Respiratory symptoms and atopy in children in Aberdeen: questionnaire studies of a defined school population repeated over 35 years. <i>BMJ.</i> 2004; 329(7464): 489-90                                                                                                                                                                                                                                                                                                                                                                    | Scientific literature |
| Kuehni CE, Davis A, Brooke AM, Silverman M. Are all wheezing disorders in very young (preschool) children increasing in prevalence?. <i>Lancet.</i> 2001; 357(9271): 1821-5                                                                                                                                                                                                                                                                                                                                                                            | Scientific literature |
| <b>England</b>                                                                                                                                                                                                                                                                                                                                                                                                                                                                                                                                         |                       |
| Williams H, Stewart A, Von Mutius E, Cookson W, Anderson HR. Is eczema really on the increase worldwide. <i>J Allergy Clin Immunol.</i> 2008; 121(4): 947-954                                                                                                                                                                                                                                                                                                                                                                                          | Scientific literature |
| Odhiambo JA, Williams HC, Clayton TO, Robertson CF, Asher MI, ISAAC Phase Three Study Group. Global variations in prevalence of eczema symptoms in children from ISAAC Phase Three. <i>J Allergy Clin Immunol.</i> 2009; 124(6): 1251-1258                                                                                                                                                                                                                                                                                                             | Scientific literature |

|                                                                                                                                                                                                                                                                                                                                                                                                                                                                                                                                                        |                       |
|--------------------------------------------------------------------------------------------------------------------------------------------------------------------------------------------------------------------------------------------------------------------------------------------------------------------------------------------------------------------------------------------------------------------------------------------------------------------------------------------------------------------------------------------------------|-----------------------|
| Shamssain M. Trends in the prevalence and severity of asthma, rhinitis and atopic eczema in 6- to 7- and 13- to 14-yr-old children from the north-east of England. <i>Pediatr Allergy Immunol.</i> 2007; 18(2): 149–53                                                                                                                                                                                                                                                                                                                                 | Scientific literature |
| Katebi R, Williams G, Bourke M, Harrison A, Verma A. What factors are associated with the prevalence of atopic symptoms amongst adolescents in Greater Manchester?. <i>Eur J Public Health.</i> 2015; nan                                                                                                                                                                                                                                                                                                                                              | Scientific literature |
| Kwong GNM, Proctor A, Billings C, Duggan R, Das C, Whyte MKB, Powell CVE, Primhak R. Increasing prevalence of asthma diagnosis and symptoms in children is confined to mild symptoms. <i>Thorax.</i> 2001; 312–4                                                                                                                                                                                                                                                                                                                                       | Scientific literature |
| Mallen CD, Mottram S, Wynne-Jones G, Thomas E. Birth-related exposures and asthma and allergy in adulthood: a population-based cross-sectional study of young adults in North Staffordshire. <i>J Asthma.</i> 2008; 45(4): 309-12                                                                                                                                                                                                                                                                                                                      | Scientific literature |
| Nevitt GJ, Hutchinson PE. Psoriasis in the community: prevalence, severity and patients' beliefs and attitudes towards the disease. <i>Br J Dermatol.</i> 1996; 135(4): 533-7                                                                                                                                                                                                                                                                                                                                                                          | Scientific literature |
| Rea JN, Newhouse ML, Halil T. Skin disease in Lambeth. A community study of prevalence and use of medical care. <i>Br J Prev Soc Med.</i> 1976; 30(2): 107-14                                                                                                                                                                                                                                                                                                                                                                                          | Scientific literature |
| Nagel G, Weinmayr G, Flohr C, Kleiner A, Strachan DP. Association of pertussis and measles infections and immunizations with asthma and allergic sensitization in ISAAC Phase Two. <i>Pediatr Allergy Immunol.</i> 2012; 23(8): 737-46                                                                                                                                                                                                                                                                                                                 | Scientific literature |
| Konstantinou GN, Papadopoulos NG, Tavladaki T, Tsekoura T, Tsilimigaki A, Grattan CEH. Childhood acute urticaria in northern and southern Europe shows a similar epidemiological pattern and significant meteorological influences. <i>Pediatr Allergy Immunol.</i> 2011; 22(1 Pt 1): 36-42                                                                                                                                                                                                                                                            | Scientific literature |
| Ziyab AH, Raza A, Karmaus W, Tongue N, Zhang H, Matthews S, Arshad SH, Roberts G. Trends in eczema in the first 18 years of life: results from the Isle of Wight 1989 birth cohort study. <i>Clin Exp Allergy.</i> 2010; 40(12): 1776-84                                                                                                                                                                                                                                                                                                               | Scientific literature |
| Flohr C, Weinmayr G, Weiland SK, Addo-Yobo E, Annesi-Maesano I, Björkstén B, Bråbäck L, Büchele G, Chico M, Cooper P, Clausen M, El Sharif N, Martinez Gimeno A, Mathur RS, von Mutius E, Morales Suarez-Varela M, Pearce N, Svabe V, Wong GWK, Yu M, Zhong NS, Williams HC, ISAAC Phase Two Study Group. How well do questionnaires perform compared with physical examination in detecting flexural eczema? Findings from the International Study of Asthma and Allergies in Childhood (ISAAC) Phase Two. <i>Br J Dermatol.</i> 2009; 161(4): 846-53 | Scientific literature |
| Punekar YS, Sheikh A. Establishing the incidence and prevalence of clinician-diagnosed allergic conditions in children and adolescents using routinely collected data from general practices. <i>Clin Exp Allergy.</i> 2009; 39(8): 1209-16                                                                                                                                                                                                                                                                                                            | Scientific literature |
| Schofield JK, Fleming D, Grindlay D, Williams H. Skin conditions are the commonest new reason people present to general practitioners in England and Wales. <i>Br J Dermatol.</i> 2011; 165(5): 1044-50                                                                                                                                                                                                                                                                                                                                                | Scientific literature |
| Flohr C, Weiland SK, Weinmayr G, Björkstén B, Bråbäck L, Brunekreef B, Büchele G, Clausen M, Cookson WOC, von Mutius E, Strachan DP, Williams HC, ISAAC Phase Two Study Group. The role of atopic sensitization in flexural eczema: findings from the International Study of Asthma and Allergies in Childhood Phase Two. <i>J Allergy Clin Immunol.</i> 2008; 121(1): 141-147                                                                                                                                                                         | Scientific literature |
| Anderson HR, Ruggles R, Strachan DP, Austin JB, Burr M, Jeffs D, Standring P, Steriu A, Goulding R. Trends in prevalence of symptoms of asthma, hay fever, and eczema in 12-14 year olds in the British Isles, 1995-2002: questionnaire survey. <i>BMJ.</i> 2004; 1052–3                                                                                                                                                                                                                                                                               | Scientific literature |
| Kuehni CE, Davis A, Brooke AM, Silverman M. Are all wheezing disorders in very young (preschool) children increasing in prevalence?. <i>Lancet.</i> 2001; 357(9271): 1821–5                                                                                                                                                                                                                                                                                                                                                                            | Scientific literature |
| Garcia-Marcos L, Robertson CF, Ross Anderson H, Ellwood P, Williams HC, Wong GW. Does migration affect asthma, rhinoconjunctivitis and eczema prevalence? Global findings from the international study of asthma and allergies in childhood. <i>Int J Epidemiol.</i> 2014; 43(6): 1846-54                                                                                                                                                                                                                                                              | Scientific literature |
| Ziyab AH, Karmaus W, Zhang H, Holloway JW, Steck SE, Ewart S, Arshad SH. Allergic sensitization and filaggrin variants predispose to the comorbidity of eczema, asthma, and rhinitis: results from the Isle of Wight birth cohort. <i>Clin Exp Allergy.</i> 2014; 44(9): 1170-8                                                                                                                                                                                                                                                                        | Scientific literature |
| Huerta C, Rivero E, Rodríguez LAG. Incidence and risk factors for psoriasis in the general population. <i>Arch Dermatol.</i> 2007; 143(12): 1559-65                                                                                                                                                                                                                                                                                                                                                                                                    | Scientific literature |
| Gelfand JM, Weinstein R, Porter SB, Neimann AL, Berlin JA, Margolis DJ. Prevalence and treatment of psoriasis in the United Kingdom: a population-based study. <i>Arch Dermatol.</i> 2005; 141(12): 1537-41                                                                                                                                                                                                                                                                                                                                            | Scientific literature |

|                                                                                                                                                                                                                                                                                           |                       |
|-------------------------------------------------------------------------------------------------------------------------------------------------------------------------------------------------------------------------------------------------------------------------------------------|-----------------------|
| Springate DA, Parisi R, Kontopantelis E, Reeves D, Griffiths CE, Ashcroft DM. Incidence, prevalence and mortality of patients with psoriasis: a UK population-based cohort study. <i>Br J Dermatol.</i> 2016; nan                                                                         | Scientific literature |
| Gillard SE, Finlay AY. Current management of psoriasis in the United Kingdom: patterns of prescribing and resource use in primary care. <i>Int J Clin Pract.</i> 2005; 59(11): 1260–7                                                                                                     | Scientific literature |
| Seminara NM, Abuabara K, Shin DB, Langan SM, Kimmel SE, Margolis D, Troxel AB, Gelfand JM. Validity of The Health Improvement Network (THIN) for the study of psoriasis. <i>Br J Dermatol.</i> 2011; 164(3): 602–9                                                                        | Scientific literature |
| World Health Organization Regional Office for Europe (WHO/Europe). European Hospital Morbidity Database 1999-2007. Copenhagen, Denmark: World Health Organization Regional Office for Europe (WHO/Europe)                                                                                 | Survey                |
| World Health Organization (WHO). United Kingdom World Health Survey 2004. Geneva, Switzerland: World Health Organization (WHO), 2005                                                                                                                                                      |                       |
| Organization for Economic Co-operation and Development (OECD). OECD Health Statistics. Paris, France: Organization for Economic Co-operation and Development (OECD)                                                                                                                       | Survey                |
| National Centre for Social Research (NatCen), World Health Organization (WHO). United Kingdom WHO Multi-country Survey Study on Health and Health System Responsiveness 2000-2001. Geneva, Switzerland: World Health Organization (WHO)                                                   | Survey                |
| NHS England. United Kingdom - England Hospital Episode Statistics 2003-2007                                                                                                                                                                                                               | Administrative record |
| NHS England. United Kingdom - England Hospital Episode Statistics 2001-2002                                                                                                                                                                                                               | Administrative record |
| NHS England. United Kingdom - England Hospital Episode Statistics 2008-2012                                                                                                                                                                                                               | Administrative record |
| NHS England. United Kingdom - England Hospital Episode Statistics 2013-2014                                                                                                                                                                                                               | Administrative record |
| Department of Health, Social Services and Public Safety (Northern Ireland), Information Centre for Health and Social Care, NHS, NHS England, NHS Health Scotland, NHS Wales. United Kingdom Hospital Patient and Discharge Data 2006                                                      | Administrative record |
| Department of Health, Social Services and Public Safety (Northern Ireland), Information Centre for Health and Social Care, NHS, NHS England, NHS Health Scotland, NHS Wales. United Kingdom Hospital Patient and Discharge Data 2012                                                      | Administrative record |
| Department of Health, Social Services and Public Safety (Northern Ireland), Information Centre for Health and Social Care, NHS, NHS England, NHS Health Scotland, NHS Wales. United Kingdom Hospital Patient and Discharge Data 2013                                                      | Administrative record |
| Department of Health, Social Services and Public Safety (Northern Ireland), Information Centre for Health and Social Care, NHS, NHS England, NHS Health Scotland, NHS Wales. United Kingdom Hospital Patient and Discharge Data 2014                                                      | Administrative record |
| Pannell RS, Fleming DM, Cross KW. The incidence of molluscum contagiosum, scabies and lichen planus. <i>Epidemiol Infect.</i> 2005; 133(6): 985-91                                                                                                                                        | Scientific literature |
| Margolis DJ, Bilker W, Knauss J, Baumgarten M, Strom BL. The incidence and prevalence of pressure ulcers among elderly patients in general medical practice. <i>Ann Epidemiol.</i> 2002; 12(5): 321-5                                                                                     | Scientific literature |
| <b>Scotland</b>                                                                                                                                                                                                                                                                           |                       |
| Williams H, Stewart A, Von Mutius E, Cookson W, Anderson HR. Is eczema really on the increase worldwide. <i>J Allergy Clin Immunol.</i> 2008; 121(4): 947-954                                                                                                                             | Scientific literature |
| Odhiambo JA, Williams HC, Clayton TO, Robertson CF, Asher MI, ISAAC Phase Three Study Group. Global variations in prevalence of eczema symptoms in children from ISAAC Phase Three. <i>J Allergy Clin Immunol.</i> 2009; 124(6): 1251-1258                                                | Scientific literature |
| Anderson HR, Ruggles R, Strachan DP, Austin JB, Burr M, Jeffs D, Standring P, Steriu A, Goulding R. Trends in prevalence of symptoms of asthma, hay fever, and eczema in 12-14 year olds in the British Isles, 1995-2002: questionnaire survey. <i>BMJ.</i> 2004; 1052–3                  | Scientific literature |
| Devenny A. Respiratory symptoms and atopy in children in Aberdeen: questionnaire studies of a defined school population repeated over 35 years. <i>BMJ.</i> 2004; 329(7464): 489–90                                                                                                       | Scientific literature |
| McNeill G, Tagiyeva N, Aucott L, Russell G, Helms PJ. Changes in the prevalence of asthma, eczema and hay fever in pre-pubertal children: a 40-year perspective. <i>Paediatr Perinat Epidemiol.</i> 2009; 23(6): 506–12                                                                   | Scientific literature |
| Garcia-Marcos L, Robertson CF, Ross Anderson H, Ellwood P, Williams HC, Wong GW. Does migration affect asthma, rhinoconjunctivitis and eczema prevalence? Global findings from the international study of asthma and allergies in childhood. <i>Int J Epidemiol.</i> 2014; 43(6): 1846-54 | Scientific literature |
| Osman M, Tagiyeva N, Wassall HJ, Ninan TK, Devenny AM, McNeill G, Helms PJ, Russell G. Changing trends in sex specific prevalence rates for childhood asthma, eczema, and hay fever. <i>Pediatr Pulmonol.</i> 2007; 42(1): 60–5                                                           | Scientific literature |



|                                                                                                                                                                                                                                                                           |                       |
|---------------------------------------------------------------------------------------------------------------------------------------------------------------------------------------------------------------------------------------------------------------------------|-----------------------|
| Springate DA, Parisi R, Kontopantelis E, Reeves D, Griffiths CE, Ashcroft DM. Incidence, prevalence and mortality of patients with psoriasis: a UK population-based cohort study. <i>Br J Dermatol</i> . 2016; nan                                                        | Scientific literature |
| Seminara NM, Abuabara K, Shin DB, Langan SM, Kimmell SE, Margolis D, Troxel AB, Gelfand JM. Validity of The Health Improvement Network (THIN) for the study of psoriasis. <i>Br J Dermatol</i> . 2011; 164(3): 602–9                                                      | Scientific literature |
| World Health Organization Regional Office for Europe (WHO/Europe). European Hospital Morbidity Database 1999-2007. Copenhagen, Denmark: World Health Organization Regional Office for Europe (WHO/Europe)                                                                 | Administrative record |
| Trinity College Dublin. Ireland Longitudinal Study on Ageing 2012-2013. Dublin, Ireland: Irish Social Science Data Archive, University College Dublin                                                                                                                     | Survey                |
| Department of Health, Social Services and Public Safety (Northern Ireland), Information Centre for Health and Social Care, NHS, NHS England, NHS Health Scotland, NHS Wales. United Kingdom Hospital Patient and Discharge Data 2006                                      | Administrative record |
| Department of Health, Social Services and Public Safety (Northern Ireland), Information Centre for Health and Social Care, NHS, NHS England, NHS Health Scotland, NHS Wales. United Kingdom Hospital Patient and Discharge Data 2012                                      | Administrative record |
| Department of Health, Social Services and Public Safety (Northern Ireland), Information Centre for Health and Social Care, NHS, NHS England, NHS Health Scotland, NHS Wales. United Kingdom Hospital Patient and Discharge Data 2013                                      | Administrative record |
| Department of Health, Social Services and Public Safety (Northern Ireland), Information Centre for Health and Social Care, NHS, NHS England, NHS Health Scotland, NHS Wales. United Kingdom Hospital Patient and Discharge Data 2014                                      | Administrative record |
| <b>Wales</b>                                                                                                                                                                                                                                                              |                       |
| World Health Organization Regional Office for Europe (WHO/Europe). European Hospital Morbidity Database 1999-2007. Copenhagen, Denmark: World Health Organization Regional Office for Europe (WHO/Europe)                                                                 | Administrative record |
| Williams H, Stewart A, Von Mutius E, Cookson W, Anderson HR. Is eczema really on the increase worldwide. <i>J Allergy Clin Immunol</i> . 2008; 121(4): 947-954                                                                                                            | Scientific literature |
| Pannell RS, Fleming DM, Cross KW. The incidence of molluscum contagiosum, scabies and lichen planus. <i>Epidemiol Infect</i> . 2005; 133(6): 985-91                                                                                                                       | Scientific literature |
| Punekar YS, Sheikh A. Establishing the incidence and prevalence of clinician-diagnosed allergic conditions in children and adolescents using routinely collected data from general practices. <i>Clin Exp Allergy</i> . 2009; 39(8): 1209-16                              | Scientific literature |
| Schofield JK, Fleming D, Grindlay D, Williams H. Skin conditions are the commonest new reason people present to general practitioners in England and Wales. <i>Br J Dermatol</i> . 2011; 165(5): 1044-50                                                                  | Scientific literature |
| Odhiambo JA, Williams HC, Clayton TO, Robertson CF, Asher MI, ISAAC Phase Three Study Group. Global variations in prevalence of eczema symptoms in children from ISAAC Phase Three. <i>J Allergy Clin Immunol</i> . 2009; 124(6): 1251-1258                               | Scientific literature |
| Huerta C, Rivero E, Rodríguez LAG. Incidence and risk factors for psoriasis in the general population. <i>Arch Dermatol</i> . 2007; 143(12): 1559-65                                                                                                                      | Scientific literature |
| Margolis DJ, Bilker W, Knauss J, Baumgarten M, Strom BL. The incidence and prevalence of pressure ulcers among elderly patients in general medical practice. <i>Ann Epidemiol</i> . 2002; 12(5): 321-5                                                                    | Scientific literature |
| Gelfand JM, Weinstein R, Porter SB, Neimann AL, Berlin JA, Margolis DJ. Prevalence and treatment of psoriasis in the United Kingdom: a population-based study. <i>Arch Dermatol</i> . 2005; 141(12): 1537-41                                                              | Scientific literature |
| Anderson HR, Ruggles R, Strachan DP, Austin JB, Burr M, Jeffs D, Standring P, Steriu A, Goulding R. Trends in prevalence of symptoms of asthma, hay fever, and eczema in 12-14 year olds in the British Isles, 1995-2002: questionnaire survey. <i>BMJ</i> . 2004; 1052–3 | Scientific literature |
| Springate DA, Parisi R, Kontopantelis E, Reeves D, Griffiths CE, Ashcroft DM. Incidence, prevalence and mortality of patients with psoriasis: a UK population-based cohort study. <i>Br J Dermatol</i> . 2016; nan                                                        | Scientific literature |
| Gillard SE, Finlay AY. Current management of psoriasis in the United Kingdom: patterns of prescribing and resource use in primary care. <i>Int J Clin Pract</i> . 2005; 59(11): 1260–7                                                                                    | Scientific literature |

|                                                                                                                                                                                                                                                                                           |                       |
|-------------------------------------------------------------------------------------------------------------------------------------------------------------------------------------------------------------------------------------------------------------------------------------------|-----------------------|
| Garcia-Marcos L, Robertson CF, Ross Anderson H, Ellwood P, Williams HC, Wong GW. Does migration affect asthma, rhinoconjunctivitis and eczema prevalence? Global findings from the international study of asthma and allergies in childhood. <i>Int J Epidemiol.</i> 2014; 43(6): 1846-54 | Scientific literature |
| Seminara NM, Abuabara K, Shin DB, Langan SM, Kimmel SE, Margolis D, Troxel AB, Gelfand JM. Validity of The Health Improvement Network (THIN) for the study of psoriasis. <i>Br J Dermatol.</i> 2011; 164(3): 602–9                                                                        | Scientific literature |
| Department of Health, Social Services and Public Safety (Northern Ireland), Information Centre for Health and Social Care, NHS, NHS England, NHS Health Scotland, NHS Wales. United Kingdom Hospital Patient and Discharge Data 2006                                                      | Administrative record |
| Department of Health, Social Services and Public Safety (Northern Ireland), Information Centre for Health and Social Care, NHS, NHS England, NHS Health Scotland, NHS Wales. United Kingdom Hospital Patient and Discharge Data 2012                                                      | Administrative record |
| Department of Health, Social Services and Public Safety (Northern Ireland), Information Centre for Health and Social Care, NHS, NHS England, NHS Health Scotland, NHS Wales. United Kingdom Hospital Patient and Discharge Data 2013                                                      | Administrative record |
| Department of Health, Social Services and Public Safety (Northern Ireland), Information Centre for Health and Social Care, NHS, NHS England, NHS Health Scotland, NHS Wales. United Kingdom Hospital Patient and Discharge Data 2014                                                      | Administrative record |
| <b>Northern Ireland</b>                                                                                                                                                                                                                                                                   |                       |
| World Health Organization Regional Office for Europe (WHO/Europe). European Hospital Morbidity Database 1999-2007. Copenhagen, Denmark: World Health Organization Regional Office for Europe (WHO/Europe)                                                                                 | Administrative record |
| Department of Health, Social Services and Public Safety (Northern Ireland), Information Centre for Health and Social Care, NHS, NHS England, NHS Health Scotland, NHS Wales. United Kingdom Hospital Patient and Discharge Data 2006                                                      | Administrative record |
| Department of Health, Social Services and Public Safety (Northern Ireland), Information Centre for Health and Social Care, NHS, NHS England, NHS Health Scotland, NHS Wales. United Kingdom Hospital Patient and Discharge Data 2012                                                      | Administrative record |
| Department of Health, Social Services and Public Safety (Northern Ireland), Information Centre for Health and Social Care, NHS, NHS England, NHS Health Scotland, NHS Wales. United Kingdom Hospital Patient and Discharge Data 2013                                                      | Administrative record |
| Department of Health, Social Services and Public Safety (Northern Ireland), Information Centre for Health and Social Care, NHS, NHS England, NHS Health Scotland, NHS Wales. United Kingdom Hospital Patient and Discharge Data 2014                                                      | Administrative record |
| Seminara NM, Abuabara K, Shin DB, Langan SM, Kimmel SE, Margolis D, Troxel AB, Gelfand JM. Validity of The Health Improvement Network (THIN) for the study of psoriasis. <i>Br J Dermatol.</i> 2011; 164(3): 602–9                                                                        | Scientific literature |
| Garcia-Marcos L, Robertson CF, Ross Anderson H, Ellwood P, Williams HC, Wong GW. Does migration affect asthma, rhinoconjunctivitis and eczema prevalence? Global findings from the international study of asthma and allergies in childhood. <i>Int J Epidemiol.</i> 2014; 43(6): 1846-54 | Scientific literature |
| Springate DA, Parisi R, Kontopantelis E, Reeves D, Griffiths CE, Ashcroft DM. Incidence, prevalence and mortality of patients with psoriasis: a UK population-based cohort study. <i>Br J Dermatol.</i> 2016; nan                                                                         | Scientific literature |
| Steele K. Primary dermatological care in general practice. <i>J R Coll Gen Pract.</i> 1984; 34(258): 22-3                                                                                                                                                                                 | Scientific literature |
| Trinity College Dublin. Ireland Longitudinal Study on Ageing 2009-2011. Dublin, Ireland: Irish Social Science Data Archive, University College Dublin                                                                                                                                     | Survey                |

**Appendix Table 5:** List of data sources used for depressive disorders across UK countries

| Citation                                                                                                                                                                                                                                                                                                                                   | Data type             |
|--------------------------------------------------------------------------------------------------------------------------------------------------------------------------------------------------------------------------------------------------------------------------------------------------------------------------------------------|-----------------------|
| <b>United Kingdom</b>                                                                                                                                                                                                                                                                                                                      |                       |
| World Health Organization (WHO). United Kingdom World Health Survey 2004. Geneva, Switzerland: World Health Organization (WHO), 2005                                                                                                                                                                                                       | Survey                |
| West P, Sweeting H, Der G, Barton J, Lucas C. Voice-DISC identified DSM-IV disorders among 15-year-olds in the west of Scotland. <i>J Am Acad Child Adolesc Psychiatry</i> . 2003; 42(8): 941-9                                                                                                                                            | Scientific literature |
| Ayuso-Mateos JL, Vázquez-Barquero JL, Dowrick C, Lehtinen V, Dalgard OS, Casey P, Wilkinson C, Lasa L, Page H, Dunn G, Wilkinson G. Depressive disorders in Europe: prevalence figures from the ODIN study. <i>Br J Psychiatry</i> . 2001; 179(4): 308-16                                                                                  | Scientific literature |
| Office of Population Censuses and Surveys. Social Survey Division, OPCS Surveys of Psychiatric Morbidity : Private Household Survey, 1993 [computer file]. Colchester, Essex: UK Data Archive [distributor], September 1996. SN: 3560, <a href="http://dx.doi.org/10.5255/UKDA-SN-3560-1">http://dx.doi.org/10.5255/UKDA-SN-3560-1</a>     | Survey                |
| Office for National Statistics, Psychiatric Morbidity among Adults Living in Private Households, 2000 [computer file]. Colchester, Essex: UK Data Archive [distributor], May 2003. SN: 4653, <a href="http://dx.doi.org/10.5255/UKDA-SN-4653-1">http://dx.doi.org/10.5255/UKDA-SN-4653-1</a>                                               | Survey                |
| Bunting B, Murphy S, O'Neill S, Ferry F. Prevalence and treatment of 12-month DSM-IV disorders in the Northern Ireland study of health and stress. <i>Soc Psychiatry Psychiatr Epidemiol</i> . 2013; 48(1): 81-93                                                                                                                          | Scientific literature |
| Adamson JA, Price GM, Breeze E, Bulpitt CJ, Fletcher AE. Are older people dying of depression? Findings from the Medical Research Council trial of the assessment and management of older people in the community. <i>J Am Geriatr Soc</i> . 2005; 53(7): 1128-32                                                                          | Scientific literature |
| Copeland JR, Beekman AT, Dewey ME, Hooijer C, Jordan A, Lawlor BA, Lobo A, Magnusson H, Mann AH, Meller I, Prince MJ, Reischies F, Turrina C, deVries MW, Wilson KC. Depression in Europe. Geographical distribution among older people. <i>Br J Psychiatry</i> . 1999; 174: 312-21                                                        | Scientific literature |
| Donnelly M. Depression among adolescents in Northern Ireland. <i>Adolescence</i> . 1995; 30(118): 339-50                                                                                                                                                                                                                                   | Scientific literature |
| Lépine JP, Gastpar M, Mendlewicz J, Tylee A. Depression in the community: the first pan-European study DEPRES (Depression Research in European Society). <i>Int Clin Psychopharmacol</i> . 1997; 12(1): 19-29                                                                                                                              | Scientific literature |
| Meltzer H, Gatward R, Goodman R, Ford T. Mental health of children and adolescents in Great Britain. <i>Int Rev Psychiatry</i> . 2003; 15(1-2): 185-7                                                                                                                                                                                      | Scientific literature |
| Saunders PA, Copeland JR, Dewey ME, Gilmore C, Larkin BA, Pharterpekar H, Scott A. The prevalence of dementia, depression and neurosis in later life: the Liverpool MRC-ALPHA Study. <i>Int J Epidemiol</i> . 1993; 22(5): 838-47                                                                                                          | Scientific literature |
| Office for National Statistics. Social and Vital Statistics Division et al. , Mental Health of Children and Young People in Great Britain, 2004 [computer file]. Colchester, Essex: UK Data Archive [distributor], October 2005. SN: 5269, <a href="http://dx.doi.org/10.5255/UKDA-SN-5269-1">http://dx.doi.org/10.5255/UKDA-SN-5269-1</a> | Administrative data   |
| National Centre for Social Research and University of Leicester, Adult Psychiatric Morbidity Survey, 2007 [computer file]. 3rd Edition. Colchester, Essex: UK Data Archive [distributor], January 2011. SN: 6379, <a href="http://dx.doi.org/10.5255/UKDA-SN-6379-1">http://dx.doi.org/10.5255/UKDA-SN-6379-1</a>                          | Survey                |
| Jenkins R, Lewis G, Bebbington P, Brugha T, Farrell M, Gill B, Meltzer H. The National Psychiatric Morbidity surveys of Great Britain-initial findings from the household survey. <i>Psychol Med</i> . 1997; 27(4): 775-89                                                                                                                 | Scientific literature |
| <b>England</b>                                                                                                                                                                                                                                                                                                                             |                       |
| World Health Organization (WHO). United Kingdom World Health Survey 2004. Geneva, Switzerland: World Health Organization (WHO), 2005                                                                                                                                                                                                       | Survey                |
| Ayuso-Mateos JL, Vázquez-Barquero JL, Dowrick C, Lehtinen V, Dalgard OS, Casey P, Wilkinson C, Lasa L, Page H, Dunn G, Wilkinson G. Depressive disorders in Europe: prevalence figures from the ODIN study. <i>Br J Psychiatry</i> . 2001; 179(4): 308-16                                                                                  | Scientific literature |
| Office of Population Censuses and Surveys. Social Survey Division, OPCS Surveys of Psychiatric Morbidity : Private Household Survey, 1993 [computer file]. Colchester, Essex: UK Data Archive [distributor], September 1996. SN: 3560, <a href="http://dx.doi.org/10.5255/UKDA-SN-3560-1">http://dx.doi.org/10.5255/UKDA-SN-3560-1</a>     | Survey                |

|                                                                                                                                                                                                                                                                                                                                            |                       |
|--------------------------------------------------------------------------------------------------------------------------------------------------------------------------------------------------------------------------------------------------------------------------------------------------------------------------------------------|-----------------------|
| Office for National Statistics, Psychiatric Morbidity among Adults Living in Private Households, 2000 [computer file]. Colchester, Essex: UK Data Archive [distributor], May 2003. SN: 4653, <a href="http://dx.doi.org/10.5255/UKDA-SN-4653-1">http://dx.doi.org/10.5255/UKDA-SN-4653-1</a>                                               | Administrative data   |
| Adamson JA, Price GM, Breeze E, Bulpitt CJ, Fletcher AE. Are older people dying of depression? Findings from the Medical Research Council trial of the assessment and management of older people in the community. <i>J Am Geriatr Soc.</i> 2005; 53(7): 1128-32                                                                           | Scientific literature |
| Copeland JR, Beekman AT, Dewey ME, Hooijer C, Jordan A, Lawlor BA, Lobo A, Magnusson H, Mann AH, Meller I, Prince MJ, Reischies F, Turrina C, deVries MW, Wilson KC. Depression in Europe. Geographical distribution among older people. <i>Br J Psychiatry.</i> 1999; 174: 312-21                                                         | Scientific literature |
| Lépine JP, Gastpar M, Mendlewicz J, Tylee A. Depression in the community: the first pan-European study DEPRES (Depression Research in European Society). <i>Int Clin Psychopharmacol.</i> 1997; 12(1): 19-29                                                                                                                               | Scientific literature |
| Meltzer H, Gatward R, Goodman R, Ford T. Mental health of children and adolescents in Great Britain. <i>Int Rev Psychiatry.</i> 2003; 15(1-2): 185-7                                                                                                                                                                                       | Scientific literature |
| Saunders PA, Copeland JR, Dewey ME, Gilmore C, Larkin BA, Phaterpekar H, Scott A. The prevalence of dementia, depression and neurosis in later life: the Liverpool MRC-ALPHA Study. <i>Int J Epidemiol.</i> 1993; 22(5): 838-47                                                                                                            | Scientific literature |
| Office for National Statistics. Social and Vital Statistics Division et al. , Mental Health of Children and Young People in Great Britain, 2004 [computer file]. Colchester, Essex: UK Data Archive [distributor], October 2005. SN: 5269, <a href="http://dx.doi.org/10.5255/UKDA-SN-5269-1">http://dx.doi.org/10.5255/UKDA-SN-5269-1</a> | Administrative data   |
| National Centre for Social Research and University of Leicester, Adult Psychiatric Morbidity Survey, 2007 [computer file]. 3rd Edition. Colchester, Essex: UK Data Archive [distributor], January 2011. SN: 6379, <a href="http://dx.doi.org/10.5255/UKDA-SN-6379-1">http://dx.doi.org/10.5255/UKDA-SN-6379-1</a>                          | Survey                |
| <b>Scotland</b>                                                                                                                                                                                                                                                                                                                            |                       |
| World Health Organization (WHO). United Kingdom World Health Survey 2004. Geneva, Switzerland: World Health Organization (WHO), 2005                                                                                                                                                                                                       | Survey                |
| Adamson JA, Price GM, Breeze E, Bulpitt CJ, Fletcher AE. Are older people dying of depression? Findings from the Medical Research Council trial of the assessment and management of older people in the community. <i>J Am Geriatr Soc.</i> 2005; 53(7): 1128-32                                                                           | Scientific literature |
| Meltzer H, Gatward R, Goodman R, Ford T. Mental health of children and adolescents in Great Britain. <i>Int Rev Psychiatry.</i> 2003; 15(1-2): 185-7                                                                                                                                                                                       | Scientific literature |
| Lépine JP, Gastpar M, Mendlewicz J, Tylee A. Depression in the community: the first pan-European study DEPRES (Depression Research in European Society). <i>Int Clin Psychopharmacol.</i> 1997; 12(1): 19-29                                                                                                                               | Scientific literature |
| Office for National Statistics. Social and Vital Statistics Division et al. , Mental Health of Children and Young People in Great Britain, 2004 [computer file]. Colchester, Essex: UK Data Archive [distributor], October 2005. SN: 5269, <a href="http://dx.doi.org/10.5255/UKDA-SN-5269-1">http://dx.doi.org/10.5255/UKDA-SN-5269-1</a> | Survey                |
| Office for National Statistics, Psychiatric Morbidity among Adults Living in Private Households, 2000 [computer file]. Colchester, Essex: UK Data Archive [distributor], May 2003. SN: 4653, <a href="http://dx.doi.org/10.5255/UKDA-SN-4653-1">http://dx.doi.org/10.5255/UKDA-SN-4653-1</a>                                               | Survey                |
| Jenkins R, Lewis G, Bebbington P, Brugha T, Farrell M, Gill B, Meltzer H. The National Psychiatric Morbidity surveys of Great Britain-initial findings from the household survey. <i>Psychol Med.</i> 1997; 27(4): 775-89                                                                                                                  | Scientific literature |
| West P, Sweeting H, Der G, Barton J, Lucas C. Voice-DISC identified DSM-IV disorders among 15-year-olds in the west of Scotland. <i>J Am Acad Child Adolesc Psychiatry.</i> 2003; 42(8): 941-9                                                                                                                                             | Scientific literature |
| <b>Wales</b>                                                                                                                                                                                                                                                                                                                               |                       |
| World Health Organization (WHO). United Kingdom World Health Survey 2004. Geneva, Switzerland: World Health Organization (WHO), 2005                                                                                                                                                                                                       | Survey                |
| Adamson JA, Price GM, Breeze E, Bulpitt CJ, Fletcher AE. Are older people dying of depression? Findings from the Medical Research Council trial of the assessment and management of older people in the community. <i>J Am Geriatr Soc.</i> 2005; 53(7): 1128-32                                                                           | Scientific literature |
| Meltzer H, Gatward R, Goodman R, Ford T. Mental health of children and adolescents in Great Britain. <i>Int Rev Psychiatry.</i> 2003; 15(1-2): 185-7                                                                                                                                                                                       | Scientific literature |
| Lépine JP, Gastpar M, Mendlewicz J, Tylee A. Depression in the community: the first pan-European study DEPRES (Depression Research in European Society). <i>Int Clin Psychopharmacol.</i> 1997; 12(1): 19-29                                                                                                                               | Scientific literature |

|                                                                                                                                                                                                                                                                                                                                            |                       |
|--------------------------------------------------------------------------------------------------------------------------------------------------------------------------------------------------------------------------------------------------------------------------------------------------------------------------------------------|-----------------------|
| Office for National Statistics. Social and Vital Statistics Division et al. , Mental Health of Children and Young People in Great Britain, 2004 [computer file]. Colchester, Essex: UK Data Archive [distributor], October 2005. SN: 5269, <a href="http://dx.doi.org/10.5255/UKDA-SN-5269-1">http://dx.doi.org/10.5255/UKDA-SN-5269-1</a> | Survey                |
| Office for National Statistics, Psychiatric Morbidity among Adults Living in Private Households, 2000 [computer file]. Colchester, Essex: UK Data Archive [distributor], May 2003. SN: 4653, <a href="http://dx.doi.org/10.5255/UKDA-SN-4653-1">http://dx.doi.org/10.5255/UKDA-SN-4653-1</a>                                               | Survey                |
| Jenkins R, Lewis G, Bebbington P, Brugha T, Farrell M, Gill B, Meltzer H. The National Psychiatric Morbidity surveys of Great Britain-initial findings from the household survey. <i>Psychol Med.</i> 1997; 27(4): 775-89                                                                                                                  | Scientific literature |
| Ayuso-Mateos JL, Vázquez-Barquero JL, Dowrick C, Lehtinen V, Dalgard OS, Casey P, Wilkinson C, Lasa L, Page H, Dunn G, Wilkinson G. Depressive disorders in Europe: prevalence figures from the ODIN study. <i>Br J Psychiatry.</i> 2001; 179(4): 308-16                                                                                   | Scientific literature |
| <b>Northern Ireland</b>                                                                                                                                                                                                                                                                                                                    |                       |
| World Health Organization (WHO). United Kingdom World Health Survey 2004. Geneva, Switzerland: World Health Organization (WHO), 2005                                                                                                                                                                                                       | Survey                |
| Adamson JA, Price GM, Breeze E, Bulpitt CJ, Fletcher AE. Are older people dying of depression? Findings from the Medical Research Council trial of the assessment and management of older people in the community. <i>J Am Geriatr Soc.</i> 2005; 53(7): 1128-32                                                                           | Scientific literature |
| Meltzer H, Gatward R, Goodman R, Ford T. Mental health of children and adolescents in Great Britain. <i>Int Rev Psychiatry.</i> 2003; 15(1-2): 185-7                                                                                                                                                                                       | Scientific literature |
| Lépine JP, Gastpar M, Mendlewicz J, Tylee A. Depression in the community: the first pan-European study DEPRES (Depression Research in European Society). <i>Int Clin Psychopharmacol.</i> 1997; 12(1): 19-29                                                                                                                               | Scientific literature |
| Office for National Statistics. Social and Vital Statistics Division et al. , Mental Health of Children and Young People in Great Britain, 2004 [computer file]. Colchester, Essex: UK Data Archive [distributor], October 2005. SN: 5269, <a href="http://dx.doi.org/10.5255/UKDA-SN-5269-1">http://dx.doi.org/10.5255/UKDA-SN-5269-1</a> | Survey                |
| Jenkins R, Lewis G, Bebbington P, Brugha T, Farrell M, Gill B, Meltzer H. The National Psychiatric Morbidity surveys of Great Britain-initial findings from the household survey. <i>Psychol Med.</i> 1997; 27(4): 775-89                                                                                                                  | Scientific literature |
| Bunting B, Murphy S, O'Neill S, Ferry F. Prevalence and treatment of 12-month DSM-IV disorders in the Northern Ireland study of health and stress. <i>Soc Psychiatry Psychiatr Epidemiol.</i> 2013; 48(1): 81-93                                                                                                                           | Scientific literature |
| Donnelly M. Depression among adolescents in Northern Ireland. <i>Adolescence.</i> 1995; 30(118): 339-50                                                                                                                                                                                                                                    | Scientific literature |

**Appendix Table 6:** Correlation coefficients between Upper Tier Local Authority estimates and Index of Multiple Deprivation (IMD) scores for the 20 causes with the highest national burden for years of life lost (YLLs) in England, 2016

| 20 causes with the highest burden for YLLs    |                             |         |
|-----------------------------------------------|-----------------------------|---------|
| Cause                                         | Correlation coefficient (r) | P value |
| All causes                                    | 0.82                        | <0.001  |
| Ischaemic heart disease                       | 0.75                        | <0.001  |
| Trachea, bronchus, and lung cancer            | 0.81                        | <0.001  |
| Cerebrovascular disease                       | 0.60                        | <0.001  |
| Alzheimer's disease and other dementias       | NA                          |         |
| Chronic obstructive pulmonary disease         | 0.81                        | <0.001  |
| Lower respiratory infections                  | 0.68                        | <0.001  |
| Colon and rectum cancer                       | 0.59                        | <0.001  |
| Cirrhosis and other chronic liver diseases    | 0.75                        | <0.001  |
| Breast cancer                                 | NA                          |         |
| Self-harm                                     | NA                          |         |
| Other cardiovascular and circulatory diseases | 0.68                        | <0.001  |
| Pancreatic cancer                             | 0.73                        | <0.001  |
| Prostate cancer                               | 0.33                        | <0.001  |
| Oesophageal cancer                            | 0.57                        | <0.001  |
| Other neoplasms                               | 0.52                        | <0.001  |
| Stomach cancer                                | 0.79                        | <0.001  |
| Leukaemia                                     | 0.66                        | <0.001  |
| Neonatal preterm birth complications          | NA                          |         |
| Congenital birth defects                      | NA                          |         |
| Brain and nervous system cancer               | 0.06                        | 0.457   |

NA = Not applicable because assumptions of Pearson's correlation coefficient not met.

**Appendix Figure 1.** Age-standardised disability-adjusted life years (DALYs) rate per 100,000 population, for the 20 causes with the highest DALY burden and decreasing Upper Tier Local Authority (UTLA) deprivation (Index of Multiple Deprivation [IMD]), England, both sexes, 2016

| Upper Tier Local Authority         | IMD score | All causes            | Low back and neck pain | Ischaemic heart disease | Skin and subcutaneous diseases | Migraine         | Sense organ diseases | Depressive disorders | Trachea, bronchus, and lung cancer | Cerebrovascular disease | Chronic obstructive pulmonary disease | Falls           | Drug use disorders | Alzheimer's disease and other dementias | Anxiety disorders | Asthma          | Oral disorders  | Other musculoskeletal disorders | Congenital birth defects | Neonatal preterm birth | Lower respiratory infections | Self-harm       |
|------------------------------------|-----------|-----------------------|------------------------|-------------------------|--------------------------------|------------------|----------------------|----------------------|------------------------------------|-------------------------|---------------------------------------|-----------------|--------------------|-----------------------------------------|-------------------|-----------------|-----------------|---------------------------------|--------------------------|------------------------|------------------------------|-----------------|
| England (95% uncertainty interval) | NA        | 19995 (17149 - 23222) | 1820 (1277 - 2387)     | 1139 (1099 - 1184)      | 1068 (730 - 1505)              | 719 (463 - 1007) | 667 (462 - 922)      | 664 (454 - 910)      | 633 (618 - 652)                    | 570 (524 - 611)         | 507 (479 - 548)                       | 450 (330 - 597) | 443 (363 - 523)    | 440 (371 - 526)                         | 435 (304 - 591)   | 375 (255 - 526) | 355 (217 - 551) | 352 (245 - 490)                 | 350 (313 - 398)          | 349 (311 - 390)        | 339 (317 - 358)              | 335 (287 - 367) |
| Blackpool                          | 42        | 25574                 | 1820                   | 1811                    | 1053                           | 718              | 695                  | 661                  | 1025                               | 913                     | 837                                   | 671             | 643                | 455                                     | 436               | 416             | 356             | 321                             | 379                      | 451                    | 573                          | 676             |
| Knowsley                           | 41        | 22199                 | 1835                   | 1481                    | 1066                           | 732              | 666                  | 668                  | 1129                               | 652                     | 871                                   | 523             | 490                | 450                                     | 442               | 379             | 354             | 320                             | 370                      | 311                    | 485                          | 264             |
| Kingston upon Hull, City of        | 41        | 22575                 | 1819                   | 1551                    | 1060                           | 714              | 674                  | 661                  | 1103                               | 751                     | 853                                   | 482             | 426                | 448                                     | 434               | 398             | 356             | 332                             | 338                      | 340                    | 453                          | 454             |
| Liverpool                          | 41        | 22740                 | 1822                   | 1371                    | 1069                           | 716              | 660                  | 657                  | 1113                               | 670                     | 813                                   | 555             | 817                | 451                                     | 346               | 376             | 353             | 338                             | 382                      | 415                    | 514                          | 312             |
| Manchester                         | 41        | 23009                 | 1816                   | 1585                    | 1083                           | 711              | 634                  | 659                  | 1065                               | 754                     | 867                                   | 593             | 708                | 448                                     | 433               | 384             | 351             | 317                             | 355                      | 430                    | 471                          | 326             |
| Middlesbrough                      | 40        | 22835                 | 1825                   | 1503                    | 1050                           | 720              | 679                  | 663                  | 1088                               | 778                     | 789                                   | 493             | 418                | 450                                     | 436               | 387             | 359             | 381                             | 342                      | 346                    | 498                          | 424             |
| Birmingham                         | 38        | 21511                 | 1823                   | 1348                    | 1062                           | 720              | 667                  | 664                  | 701                                | 634                     | 586                                   | 552             | 625                | 442                                     | 437               | 376             | 354             | 323                             | 445                      | 664                    | 394                          | 289             |
| Nottingham                         | 37        | 22494                 | 1819                   | 1438                    | 1071                           | 711              | 766                  | 661                  | 892                                | 682                     | 749                                   | 492             | 405                | 447                                     | 433               | 383             | 356             | 338                             | 474                      | 511                    | 423                          | 374             |
| Tower Hamlets                      | 36        | 20784                 | 1795                   | 1283                    | 1096                           | 704              | 592                  | 657                  | 866                                | 546                     | 690                                   | 447             | 679                | 428                                     | 430               | 416             | 347             | 368                             | 330                      | 361                    | 334                          | 234             |
| Hackney                            | 35        | 20719                 | 1806                   | 1226                    | 1115                           | 718              | 584                  | 663                  | 720                                | 529                     | 565                                   | 448             | 651                | 426                                     | 436               | 421             | 346             | 398                             | 279                      | 425                    | 330                          | 246             |
| Barking and Dagenham               | 35        | 21800                 | 1816                   | 1458                    | 1142                           | 725              | 687                  | 666                  | 959                                | 578                     | 742                                   | 439             | 316                | 442                                     | 438               | 403             | 355             | 350                             | 382                      | 338                    | 474                          | 298             |
| Sandwell                           | 35        | 22017                 | 1821                   | 1444                    | 1061                           | 719              | 685                  | 664                  | 801                                | 705                     | 671                                   | 498             | 427                | 450                                     | 436               | 393             | 356             | 338                             | 470                      | 516                    | 410                          | 340             |
| Stoke-on-Trent                     | 34        | 23023                 | 1817                   | 1432                    | 1051                           | 715              | 677                  | 661                  | 930                                | 626                     | 774                                   | 663             | 605                | 452                                     | 435               | 383             | 354             | 370                             | 575                      | 617                    | 416                          | 365             |
| Blackburn with Darwen              | 34        | 22603                 | 1822                   | 1723                    | 1041                           | 718              | 685                  | 662                  | 817                                | 744                     | 789                                   | 490             | 599                | 453                                     | 435               | 396             | 358             | 383                             | 350                      | 444                    | 439                          | 446             |
| Rochdale                           | 34        | 22319                 | 1825                   | 1601                    | 1053                           | 722              | 695                  | 664                  | 863                                | 766                     | 747                                   | 473             | 540                | 455                                     | 437               | 392             | 356             | 344                             | 353                      | 363                    | 443                          | 397             |
| Wolverhampton                      | 33        | 22293                 | 1820                   | 1455                    | 1061                           | 717              | 678                  | 663                  | 778                                | 721                     | 618                                   | 461             | 466                | 448                                     | 436               | 380             | 352             | 420                             | 409                      | 513                    | 421                          | 378             |
| Hartlepool                         | 33        | 22019                 | 1829                   | 1395                    | 1053                           | 725              | 691                  | 665                  | 1026                               | 735                     | 671                                   | 452             | 423                | 448                                     | 438               | 383             | 352             | 326                             | 297                      | 363                    | 429                          | 393             |
| Bradford                           | 33        | 21477                 | 1825                   | 1443                    | 1047                           | 719              | 685                  | 663                  | 739                                | 697                     | 694                                   | 448             | 519                | 449                                     | 437               | 373             | 359             | 395                             | 452                      | 504                    | 418                          | 345             |
| Leicester                          | 33        | 21743                 | 1826                   | 1598                    | 1065                           | 718              | 670                  | 663                  | 698                                | 683                     | 625                                   | 507             | 420                | 450                                     | 436               | 380             | 365             | 310                             | 442                      | 487                    | 473                          | 344             |
| Salford                            | 33        | 22671                 | 1817                   | 1526                    | 1065                           | 713              | 658                  | 660                  | 1020                               | 711                     | 811                                   | 527             | 538                | 450                                     | 434               | 388             | 354             | 327                             | 383                      | 362                    | 485                          | 381             |
| Newham                             | 33        | 20398                 | 1801                   | 1354                    | 1058                           | 704              | 673                  | 659                  | 716                                | 552                     | 628                                   | 428             | 355                | 434                                     | 431               | 413             | 352             | 329                             | 315                      | 346                    | 400                          | 269             |
| Islington                          | 33        | 20610                 | 1806                   | 1172                    | 1103                           | 715              | 597                  | 663                  | 808                                | 509                     | 583                                   | 466             | 662                | 430                                     | 435               | 407             | 348             | 375                             | 310                      | 257                    | 370                          | 280             |
| Halton                             | 32        | 21766                 | 1826                   | 1418                    | 1072                           | 723              | 656                  | 665                  | 933                                | 657                     | 694                                   | 489             | 388                | 451                                     | 438               | 386             | 357             | 336                             | 357                      | 327                    | 478                          | 375             |
| Haringey                           | 31        | 19959                 | 1810                   | 1165                    | 1074                           | 715              | 669                  | 663                  | 603                                | 527                     | 478                                   | 414             | 448                | 432                                     | 435               | 408             | 355             | 354                             | 277                      | 324                    | 360                          | 326             |
| North East Lincolnshire            | 31        | 21567                 | 1826                   | 1489                    | 1056                           | 720              | 667                  | 664                  | 785                                | 663                     | 663                                   | 419             | 359                | 447                                     | 437               | 378             | 362             | 357                             | 386                      | 340                    | 385                          | 457             |
| South Tyneside                     | 31        | 21342                 | 1830                   | 1264                    | 1102                           | 724              | 698                  | 665                  | 1010                               | 668                     | 690                                   | 462             | 510                | 449                                     | 438               | 371             | 355             | 337                             | 286                      | 229                    | 376                          | 364             |
| Walsall                            | 30        | 21876                 | 1823                   | 1462                    | 1052                           | 720              | 692                  | 664                  | 726                                | 627                     | 636                                   | 493             | 538                | 446                                     | 437               | 387             | 353             | 338                             | 461                      | 635                    | 368                          | 319             |

|                        |    |       |      |      |      |     |     |     |      |     |     |     |     |     |     |     |     |     |     |     |     |     |
|------------------------|----|-------|------|------|------|-----|-----|-----|------|-----|-----|-----|-----|-----|-----|-----|-----|-----|-----|-----|-----|-----|
| Oldham                 | 30 | 22277 | 1825 | 1548 | 1047 | 720 | 695 | 663 | 853  | 753 | 751 | 468 | 461 | 460 | 436 | 379 | 361 | 367 | 421 | 444 | 403 | 393 |
| Waltham Forest         | 30 | 20442 | 1809 | 1307 | 1056 | 717 | 736 | 664 | 692  | 534 | 537 | 432 | 429 | 440 | 436 | 402 | 356 | 339 | 355 | 285 | 444 | 327 |
| St Helens              | 30 | 22137 | 1826 | 1532 | 1054 | 721 | 689 | 664 | 866  | 682 | 773 | 520 | 435 | 453 | 437 | 372 | 356 | 310 | 332 | 311 | 507 | 405 |
| Sunderland             | 30 | 22048 | 1828 | 1398 | 1120 | 723 | 675 | 666 | 964  | 721 | 748 | 469 | 475 | 452 | 437 | 386 | 355 | 330 | 357 | 320 | 437 | 403 |
| Barnsley               | 30 | 21661 | 1824 | 1563 | 1052 | 719 | 697 | 663 | 837  | 665 | 691 | 420 | 425 | 451 | 436 | 391 | 357 | 496 | 376 | 327 | 411 | 434 |
| Southwark              | 29 | 20384 | 1807 | 1023 | 1099 | 717 | 608 | 662 | 762  | 459 | 630 | 458 | 455 | 427 | 436 | 411 | 347 | 381 | 311 | 385 | 327 | 286 |
| Tameside               | 29 | 22354 | 1825 | 1759 | 1047 | 722 | 691 | 664 | 925  | 725 | 742 | 551 | 535 | 455 | 437 | 396 | 357 | 342 | 367 | 311 | 414 | 372 |
| Doncaster              | 29 | 21870 | 1822 | 1404 | 1048 | 717 | 690 | 662 | 889  | 614 | 711 | 429 | 411 | 451 | 435 | 387 | 362 | 423 | 505 | 420 | 420 | 403 |
| Lambeth                | 29 | 20870 | 1805 | 1064 | 1092 | 715 | 630 | 661 | 735  | 510 | 588 | 472 | 582 | 433 | 435 | 412 | 349 | 369 | 340 | 404 | 344 | 301 |
| Torbay                 | 29 | 20840 | 1824 | 1173 | 1046 | 724 | 695 | 665 | 627  | 628 | 437 | 464 | 323 | 441 | 438 | 358 | 359 | 336 | 546 | 344 | 336 | 513 |
| Lewisham               | 29 | 20580 | 1814 | 1173 | 1065 | 722 | 681 | 666 | 777  | 557 | 620 | 400 | 455 | 440 | 438 | 398 | 355 | 406 | 319 | 398 | 452 | 272 |
| Redcar and Cleveland   | 29 | 21338 | 1830 | 1407 | 1045 | 725 | 698 | 666 | 873  | 698 | 633 | 476 | 300 | 449 | 438 | 369 | 357 | 349 | 273 | 271 | 404 | 432 |
| Bolton                 | 28 | 21336 | 1825 | 1396 | 1048 | 720 | 689 | 663 | 725  | 721 | 666 | 488 | 478 | 453 | 436 | 375 | 356 | 361 | 354 | 359 | 456 | 425 |
| Rotherham              | 28 | 21439 | 1826 | 1510 | 1047 | 721 | 690 | 664 | 806  | 652 | 616 | 460 | 338 | 453 | 437 | 381 | 359 | 356 | 440 | 400 | 465 | 423 |
| Newcastle upon Tyne    | 28 | 21576 | 1818 | 1229 | 1076 | 712 | 648 | 661 | 1022 | 631 | 680 | 478 | 572 | 428 | 433 | 370 | 355 | 329 | 321 | 330 | 369 | 355 |
| Coventry               | 28 | 21207 | 1818 | 1238 | 1068 | 714 | 662 | 661 | 757  | 634 | 642 | 471 | 489 | 444 | 434 | 397 | 352 | 343 | 386 | 386 | 345 | 340 |
| Derby                  | 28 | 21189 | 1827 | 1387 | 1073 | 718 | 652 | 664 | 722  | 621 | 598 | 488 | 343 | 447 | 435 | 377 | 356 | 329 | 408 | 467 | 411 | 329 |
| Westminster            | 28 | 18399 | 1798 | 818  | 1103 | 705 | 582 | 657 | 540  | 380 | 397 | 468 | 564 | 409 | 430 | 407 | 345 | 349 | 232 | 237 | 216 | 359 |
| Peterborough           | 28 | 20802 | 1815 | 1298 | 1059 | 715 | 654 | 662 | 645  | 604 | 572 | 452 | 394 | 443 | 435 | 376 | 356 | 325 | 336 | 308 | 387 | 469 |
| Luton                  | 28 | 20826 | 1813 | 1293 | 1064 | 714 | 665 | 662 | 661  | 579 | 549 | 472 | 467 | 443 | 434 | 383 | 354 | 320 | 395 | 435 | 391 | 331 |
| Sheffield              | 28 | 20607 | 1822 | 1262 | 1062 | 717 | 667 | 663 | 735  | 618 | 549 | 420 | 466 | 446 | 435 | 369 | 358 | 540 | 405 | 395 | 310 | 305 |
| Bristol, City of       | 27 | 20214 | 1815 | 1087 | 1076 | 714 | 638 | 663 | 691  | 554 | 519 | 423 | 557 | 443 | 435 | 358 | 358 | 487 | 348 | 305 | 338 | 304 |
| Portsmouth             | 27 | 20996 | 1810 | 1291 | 1070 | 711 | 659 | 661 | 776  | 660 | 629 | 450 | 320 | 446 | 433 | 371 | 357 | 337 | 287 | 245 | 356 | 351 |
| Enfield                | 27 | 19027 | 1818 | 1079 | 1064 | 727 | 668 | 669 | 561  | 511 | 426 | 395 | 334 | 432 | 439 | 403 | 357 | 334 | 333 | 329 | 324 | 257 |
| Wakefield              | 27 | 21081 | 1826 | 1379 | 1054 | 721 | 676 | 665 | 825  | 649 | 648 | 409 | 437 | 450 | 437 | 391 | 355 | 448 | 324 | 336 | 425 | 384 |
| Wirral                 | 27 | 21590 | 1830 | 1246 | 1053 | 726 | 698 | 666 | 804  | 674 | 622 | 462 | 491 | 448 | 439 | 371 | 355 | 345 | 405 | 381 | 400 | 411 |
| Southampton            | 27 | 20552 | 1810 | 1203 | 1064 | 710 | 665 | 661 | 751  | 585 | 619 | 463 | 422 | 442 | 433 | 370 | 356 | 334 | 316 | 295 | 334 | 356 |
| Brent                  | 27 | 19057 | 1807 | 1120 | 1062 | 713 | 665 | 662 | 521  | 490 | 406 | 405 | 440 | 424 | 433 | 412 | 354 | 340 | 269 | 353 | 302 | 276 |
| Plymouth               | 27 | 20769 | 1818 | 1213 | 1061 | 717 | 674 | 663 | 732  | 558 | 517 | 483 | 424 | 440 | 435 | 363 | 354 | 349 | 458 | 326 | 350 | 368 |
| Leeds                  | 27 | 20727 | 1826 | 1358 | 1072 | 721 | 647 | 666 | 803  | 579 | 596 | 443 | 526 | 440 | 437 | 369 | 360 | 401 | 342 | 361 | 347 | 337 |
| Gateshead              | 26 | 21564 | 1825 | 1362 | 1113 | 719 | 669 | 663 | 963  | 641 | 661 | 489 | 573 | 448 | 436 | 381 | 354 | 359 | 343 | 370 | 389 | 330 |
| County Durham          | 26 | 21445 | 1826 | 1372 | 1106 | 721 | 691 | 664 | 851  | 699 | 676 | 464 | 476 | 448 | 436 | 383 | 357 | 337 | 349 | 335 | 362 | 442 |
| Sefton                 | 26 | 21842 | 1829 | 1317 | 1051 | 724 | 692 | 666 | 856  | 630 | 650 | 508 | 586 | 453 | 438 | 374 | 355 | 341 | 391 | 385 | 391 | 400 |
| Greenwich              | 26 | 20245 | 1808 | 1152 | 1052 | 716 | 685 | 662 | 765  | 585 | 645 | 390 | 397 | 446 | 435 | 405 | 351 | 399 | 372 | 369 | 355 | 295 |
| Camden                 | 25 | 18988 | 1807 | 860  | 1103 | 715 | 590 | 661 | 585  | 405 | 454 | 450 | 801 | 415 | 435 | 408 | 348 | 348 | 212 | 259 | 260 | 289 |
| Wigan                  | 25 | 21989 | 1823 | 1555 | 1052 | 719 | 697 | 664 | 854  | 726 | 744 | 477 | 500 | 455 | 436 | 373 | 361 | 348 | 364 | 324 | 482 | 460 |
| Telford and Wrekin     | 25 | 21557 | 1819 | 1364 | 1054 | 717 | 666 | 662 | 756  | 711 | 588 | 465 | 428 | 453 | 436 | 363 | 356 | 427 | 445 | 487 | 407 | 312 |
| Stockton-on-Tees       | 25 | 20911 | 1828 | 1270 | 1057 | 722 | 673 | 665 | 827  | 661 | 556 | 460 | 400 | 445 | 437 | 371 | 359 | 323 | 270 | 379 | 397 | 368 |
| Calderdale             | 25 | 21358 | 1826 | 1404 | 1062 | 721 | 668 | 664 | 766  | 652 | 679 | 436 | 380 | 451 | 437 | 373 | 360 | 389 | 387 | 363 | 413 | 471 |
| Southend-on-Sea        | 25 | 20591 | 1818 | 1179 | 1061 | 720 | 685 | 665 | 677  | 584 | 525 | 400 | 371 | 445 | 437 | 367 | 353 | 480 | 379 | 298 | 386 | 450 |
| Hammersmith and Fulham | 24 | 19706 | 1814 | 1005 | 1096 | 720 | 606 | 666 | 694  | 431 | 552 | 447 | 388 | 422 | 438 | 414 | 350 | 395 | 255 | 294 | 271 | 320 |
| Kirklees               | 24 | 20698 | 1824 | 1330 | 1051 | 718 | 687 | 662 | 686  | 673 | 554 | 438 | 369 | 448 | 436 | 371 | 356 | 375 | 431 | 442 | 398 | 380 |
| Kirkwall               | 24 | 19844 | 1824 | 1079 | 1049 | 724 | 684 | 665 | 519  | 570 | 424 | 457 | 441 | 435 | 438 | 356 | 355 | 355 | 413 | 405 | 281 | 432 |
| Croydon                | 24 | 19732 | 1816 | 1112 | 1061 | 726 | 675 | 668 | 571  | 553 | 530 | 409 | 395 | 442 | 439 | 411 | 356 | 416 | 374 | 332 | 357 | 295 |
| Darlington             | 24 | 21031 | 1828 | 1320 | 1063 | 725 | 662 | 666 | 741  | 657 | 533 | 463 | 328 | 448 | 438 | 379 | 360 | 353 | 265 | 325 | 348 | 546 |
| Ealing                 | 24 | 19209 | 1808 | 1130 | 1071 | 716 | 658 | 663 | 541  | 471 | 433 | 396 | 450 | 430 | 435 | 408 | 359 | 371 | 265 | 286 | 380 | 278 |



|                           |    |       |      |      |      |     |     |     |     |     |     |     |     |     |     |     |     |     |     |     |     |     |
|---------------------------|----|-------|------|------|------|-----|-----|-----|-----|-----|-----|-----|-----|-----|-----|-----|-----|-----|-----|-----|-----|-----|
| Brighton and Hove         | 23 | 20449 | 1811 | 967  | 1124 | 714 | 653 | 661 | 662 | 529 | 477 | 455 | 575 | 437 | 434 | 368 | 350 | 379 | 372 | 327 | 305 | 426 |
| Kensington and Chelsea    | 23 | 17558 | 1812 | 665  | 1094 | 718 | 608 | 665 | 478 | 342 | 372 | 436 | 440 | 404 | 436 | 399 | 353 | 345 | 191 | 238 | 198 | 372 |
| Isle of Wight             | 23 | 19217 | 1820 | 1054 | 1046 | 721 | 672 | 665 | 526 | 508 | 371 | 415 | 322 | 429 | 436 | 374 | 355 | 351 | 299 | 199 | 284 | 472 |
| Dudley                    | 23 | 20810 | 1824 | 1192 | 1058 | 721 | 693 | 664 | 627 | 636 | 585 | 470 | 463 | 444 | 437 | 370 | 352 | 346 | 484 | 434 | 343 | 359 |
| Slough                    | 23 | 20526 | 1815 | 1359 | 1079 | 716 | 622 | 663 | 682 | 554 | 570 | 444 | 420 | 446 | 435 | 391 | 356 | 322 | 387 | 350 | 452 | 319 |
| Lancashire                | 22 | 20936 | 1823 | 1275 | 1057 | 719 | 674 | 663 | 681 | 630 | 573 | 496 | 675 | 443 | 436 | 371 | 356 | 331 | 380 | 409 | 396 | 373 |
| Hounslow                  | 22 | 19464 | 1805 | 1093 | 1077 | 713 | 633 | 662 | 604 | 483 | 497 | 413 | 402 | 432 | 434 | 413 | 353 | 412 | 323 | 334 | 342 | 271 |
| Medway                    | 22 | 20581 | 1817 | 1173 | 1048 | 719 | 688 | 664 | 730 | 548 | 646 | 435 | 345 | 448 | 436 | 362 | 355 | 346 | 323 | 301 | 356 | 336 |
| Bournemouth               | 22 | 20267 | 1812 | 1118 | 1061 | 710 | 665 | 660 | 633 | 634 | 429 | 452 | 386 | 444 | 433 | 366 | 355 | 326 | 317 | 253 | 338 | 439 |
| Bury                      | 22 | 21767 | 1827 | 1483 | 1056 | 723 | 689 | 665 | 827 | 728 | 675 | 492 | 405 | 457 | 437 | 374 | 359 | 335 | 365 | 344 | 425 | 379 |
| Thurrock                  | 22 | 19882 | 1820 | 1220 | 1058 | 722 | 683 | 665 | 683 | 539 | 581 | 403 | 362 | 442 | 438 | 380 | 356 | 344 | 348 | 276 | 350 | 307 |
| North Lincolnshire        | 21 | 20983 | 1823 | 1387 | 1058 | 719 | 677 | 662 | 726 | 655 | 610 | 429 | 319 | 446 | 436 | 386 | 353 | 337 | 339 | 353 | 367 | 451 |
| Cumbria                   | 21 | 20503 | 1823 | 1241 | 1053 | 719 | 668 | 663 | 620 | 628 | 501 | 478 | 529 | 442 | 436 | 375 | 356 | 368 | 377 | 301 | 282 | 403 |
| North Tyneside            | 21 | 21319 | 1829 | 1262 | 1058 | 724 | 676 | 666 | 949 | 647 | 604 | 591 | 453 | 445 | 438 | 368 | 358 | 302 | 294 | 257 | 379 | 379 |
| Norfolk                   | 21 | 19556 | 1818 | 1036 | 1056 | 719 | 669 | 664 | 524 | 547 | 387 | 432 | 561 | 434 | 436 | 361 | 356 | 343 | 360 | 341 | 273 | 356 |
| Lincolnshire              | 21 | 20031 | 1829 | 1257 | 1054 | 722 | 683 | 665 | 577 | 576 | 495 | 420 | 413 | 440 | 437 | 364 | 355 | 333 | 340 | 326 | 308 | 366 |
| Northumberland            | 21 | 21004 | 1827 | 1309 | 1051 | 722 | 692 | 664 | 802 | 689 | 571 | 517 | 424 | 451 | 437 | 371 | 356 | 327 | 396 | 293 | 377 | 421 |
| Redbridge                 | 20 | 19321 | 1811 | 1201 | 1059 | 719 | 718 | 664 | 553 | 506 | 413 | 415 | 363 | 434 | 436 | 405 | 353 | 332 | 323 | 259 | 375 | 294 |
| Herefordshire, County of  | 20 | 20010 | 1820 | 1153 | 1053 | 717 | 672 | 664 | 491 | 619 | 403 | 423 | 393 | 434 | 435 | 377 | 360 | 349 | 414 | 331 | 258 | 498 |
| Reading                   | 19 | 20467 | 1811 | 1111 | 1174 | 715 | 623 | 661 | 617 | 588 | 546 | 485 | 337 | 442 | 434 | 377 | 353 | 327 | 266 | 365 | 436 | 317 |
| Warrington                | 19 | 21045 | 1822 | 1387 | 1074 | 717 | 640 | 662 | 740 | 669 | 597 | 459 | 394 | 453 | 435 | 393 | 354 | 323 | 316 | 361 | 478 | 381 |
| Bedford                   | 19 | 20434 | 1819 | 1221 | 1061 | 721 | 667 | 664 | 574 | 616 | 511 | 439 | 363 | 451 | 437 | 363 | 354 | 331 | 427 | 336 | 341 | 377 |
| Stockport                 | 19 | 20842 | 1825 | 1299 | 1063 | 722 | 666 | 664 | 728 | 633 | 567 | 519 | 409 | 443 | 437 | 373 | 360 | 335 | 346 | 375 | 322 | 376 |
| Northamptonshire          | 19 | 20120 | 1827 | 1080 | 1059 | 720 | 667 | 663 | 599 | 564 | 533 | 432 | 472 | 442 | 437 | 369 | 356 | 345 | 370 | 395 | 350 | 317 |
| Nottinghamshire           | 19 | 19998 | 1828 | 1116 | 1052 | 720 | 686 | 665 | 624 | 573 | 525 | 442 | 376 | 445 | 436 | 367 | 353 | 331 | 369 | 380 | 321 | 322 |
| East Sussex               | 19 | 19765 | 1820 | 938  | 1097 | 723 | 685 | 666 | 540 | 489 | 391 | 427 | 461 | 433 | 437 | 427 | 354 | 393 | 408 | 309 | 295 | 426 |
| Kent                      | 19 | 19296 | 1819 | 1001 | 1102 | 721 | 673 | 665 | 560 | 531 | 475 | 438 | 477 | 436 | 437 | 353 | 352 | 341 | 294 | 293 | 315 | 310 |
| Derbyshire                | 19 | 19940 | 1828 | 1213 | 1055 | 722 | 682 | 665 | 592 | 585 | 497 | 487 | 419 | 444 | 437 | 364 | 353 | 332 | 352 | 323 | 341 | 306 |
| Suffolk                   | 18 | 19001 | 1817 | 1020 | 1052 | 718 | 673 | 663 | 500 | 527 | 368 | 411 | 398 | 437 | 436 | 357 | 354 | 367 | 334 | 294 | 286 | 334 |
| Wandsworth                | 18 | 19384 | 1820 | 1051 | 1093 | 729 | 636 | 670 | 653 | 483 | 532 | 433 | 372 | 432 | 441 | 407 | 354 | 348 | 251 | 277 | 365 | 277 |
| Hillingdon                | 18 | 19753 | 1808 | 1098 | 1081 | 716 | 625 | 664 | 634 | 495 | 472 | 406 | 410 | 429 | 435 | 407 | 357 | 394 | 321 | 294 | 354 | 310 |
| Cheshire West and Chester | 18 | 20200 | 1827 | 1153 | 1069 | 724 | 653 | 665 | 647 | 585 | 520 | 469 | 476 | 444 | 438 | 371 | 354 | 326 | 301 | 351 | 325 | 373 |
| Milton Keynes             | 18 | 19999 | 1819 | 1078 | 1072 | 721 | 629 | 665 | 655 | 554 | 555 | 498 | 375 | 444 | 437 | 374 | 353 | 314 | 343 | 378 | 459 | 346 |
| Havering                  | 18 | 19588 | 1818 | 1156 | 1060 | 726 | 675 | 668 | 662 | 513 | 515 | 421 | 332 | 440 | 440 | 398 | 356 | 332 | 300 | 247 | 364 | 276 |
| Swindon                   | 18 | 19941 | 1819 | 1180 | 1073 | 718 | 651 | 664 | 667 | 557 | 530 | 410 | 329 | 448 | 436 | 363 | 354 | 412 | 267 | 300 | 396 | 317 |
| Barnet                    | 18 | 18481 | 1815 | 1002 | 1070 | 720 | 666 | 666 | 503 | 453 | 372 | 397 | 369 | 428 | 437 | 397 | 354 | 333 | 247 | 259 | 318 | 296 |
| Somerset                  | 18 | 19252 | 1823 | 953  | 1053 | 722 | 678 | 666 | 474 | 537 | 394 | 433 | 357 | 439 | 437 | 353 | 358 | 363 | 391 | 343 | 271 | 395 |
| Worcestershire            | 18 | 19900 | 1822 | 1033 | 1056 | 720 | 673 | 664 | 526 | 615 | 448 | 482 | 435 | 441 | 436 | 368 | 353 | 334 | 409 | 384 | 347 | 376 |
| Solihull                  | 17 | 19443 | 1826 | 1022 | 1066 | 724 | 648 | 666 | 568 | 527 | 404 | 508 | 447 | 434 | 438 | 366 | 357 | 327 | 473 | 355 | 264 | 306 |
| Essex                     | 17 | 19200 | 1822 | 1011 | 1062 | 722 | 671 | 666 | 561 | 527 | 459 | 402 | 440 | 436 | 437 | 360 | 354 | 357 | 314 | 331 | 299 | 307 |
| Devon                     | 17 | 19162 | 1823 | 971  | 1055 | 721 | 673 | 665 | 477 | 526 | 348 | 457 | 417 | 435 | 437 | 356 | 357 | 334 | 372 | 337 | 281 | 394 |
| Shropshire                | 17 | 19834 | 1819 | 1149 | 1048 | 714 | 673 | 662 | 545 | 625 | 452 | 421 | 420 | 444 | 435 | 361 | 355 | 405 | 340 | 327 | 304 | 407 |
| Staffordshire             | 16 | 19932 | 1819 | 1102 | 1053 | 716 | 679 | 662 | 549 | 581 | 476 | 513 | 475 | 442 | 435 | 366 | 353 | 335 | 405 | 469 | 311 | 334 |
| Bexley                    | 16 | 19213 | 1817 | 1097 | 1059 | 727 | 680 | 669 | 666 | 490 | 488 | 404 | 326 | 432 | 439 | 398 | 356 | 378 | 343 | 263 | 261 | 291 |
| East Riding of Yorkshire  | 16 | 19883 | 1826 | 1214 | 1050 | 720 | 681 | 664 | 614 | 631 | 492 | 427 | 281 | 441 | 436 | 370 | 357 | 336 | 414 | 266 | 323 | 399 |
| North Somerset            | 16 | 19954 | 1823 | 1031 | 1056 | 723 | 674 | 666 | 536 | 613 | 404 | 401 | 399 | 449 | 437 | 361 | 356 | 486 | 459 | 304 | 312 | 345 |

|                              |    |       |      |      |      |     |     |     |     |     |     |     |     |     |     |     |     |     |     |     |     |     |
|------------------------------|----|-------|------|------|------|-----|-----|-----|-----|-----|-----|-----|-----|-----|-----|-----|-----|-----|-----|-----|-----|-----|
| Trafford                     | 15 | 19892 | 1826 | 1222 | 1071 | 721 | 640 | 664 | 696 | 587 | 517 | 500 | 435 | 441 | 437 | 380 | 355 | 343 | 290 | 278 | 279 | 337 |
| Poole                        | 15 | 19106 | 1820 | 955  | 1060 | 718 | 657 | 664 | 543 | 531 | 402 | 457 | 314 | 443 | 436 | 353 | 356 | 309 | 360 | 250 | 306 | 385 |
| Bromley                      | 15 | 18755 | 1819 | 1012 | 1063 | 728 | 668 | 669 | 545 | 486 | 425 | 383 | 339 | 433 | 440 | 400 | 356 | 370 | 286 | 232 | 278 | 303 |
| Gloucestershire              | 15 | 19035 | 1822 | 986  | 1061 | 721 | 659 | 665 | 494 | 541 | 415 | 448 | 448 | 438 | 437 | 356 | 353 | 328 | 350 | 285 | 317 | 354 |
| Warwickshire                 | 15 | 19706 | 1821 | 1035 | 1067 | 718 | 652 | 663 | 546 | 566 | 429 | 466 | 455 | 439 | 436 | 380 | 353 | 322 | 382 | 394 | 325 | 354 |
| Merton                       | 15 | 18800 | 1815 | 1042 | 1068 | 721 | 655 | 667 | 573 | 446 | 475 | 435 | 326 | 429 | 438 | 406 | 353 | 343 | 295 | 293 | 296 | 289 |
| North Yorkshire              | 15 | 19434 | 1824 | 1178 | 1052 | 717 | 666 | 663 | 521 | 625 | 423 | 420 | 357 | 440 | 435 | 362 | 360 | 345 | 335 | 306 | 283 | 406 |
| Sutton                       | 15 | 19003 | 1817 | 1016 | 1061 | 726 | 669 | 668 | 603 | 481 | 511 | 402 | 370 | 438 | 439 | 401 | 353 | 350 | 352 | 253 | 326 | 325 |
| Dorset                       | 14 | 18773 | 1821 | 888  | 1048 | 719 | 677 | 664 | 462 | 490 | 329 | 429 | 346 | 430 | 436 | 355 | 355 | 351 | 328 | 321 | 245 | 393 |
| Harrow                       | 14 | 18285 | 1811 | 1017 | 1055 | 717 | 677 | 664 | 458 | 399 | 368 | 390 | 310 | 421 | 435 | 400 | 358 | 324 | 287 | 388 | 265 | 284 |
| Cheshire East                | 14 | 19697 | 1826 | 1093 | 1067 | 722 | 644 | 665 | 536 | 600 | 459 | 452 | 418 | 443 | 437 | 371 | 354 | 341 | 382 | 316 | 317 | 371 |
| West Sussex                  | 14 | 19164 | 1822 | 940  | 1072 | 723 | 660 | 666 | 519 | 520 | 396 | 410 | 399 | 437 | 438 | 355 | 353 | 389 | 340 | 300 | 302 | 360 |
| Wiltshire                    | 13 | 18887 | 1819 | 937  | 1052 | 717 | 673 | 664 | 472 | 521 | 377 | 401 | 337 | 440 | 435 | 354 | 356 | 435 | 353 | 315 | 315 | 336 |
| Cambridgeshire               | 13 | 18472 | 1814 | 911  | 1066 | 716 | 647 | 664 | 483 | 485 | 386 | 432 | 392 | 438 | 434 | 360 | 353 | 320 | 318 | 290 | 253 | 303 |
| Leicestershire               | 12 | 19110 | 1828 | 1070 | 1061 | 720 | 666 | 665 | 508 | 508 | 415 | 444 | 353 | 437 | 436 | 362 | 360 | 316 | 317 | 376 | 313 | 317 |
| York                         | 12 | 19629 | 1825 | 1209 | 1071 | 719 | 649 | 665 | 598 | 591 | 510 | 448 | 272 | 441 | 437 | 360 | 358 | 396 | 381 | 265 | 291 | 386 |
| Central Bedfordshire         | 12 | 18745 | 1819 | 993  | 1063 | 721 | 673 | 665 | 536 | 481 | 455 | 424 | 367 | 436 | 436 | 367 | 354 | 321 | 300 | 229 | 301 | 270 |
| Hertfordshire                | 12 | 18557 | 1822 | 945  | 1071 | 723 | 645 | 667 | 532 | 497 | 433 | 422 | 411 | 435 | 438 | 359 | 354 | 319 | 258 | 264 | 327 | 255 |
| Bath and North East Somerset | 12 | 18502 | 1821 | 902  | 1062 | 719 | 663 | 666 | 467 | 493 | 349 | 414 | 341 | 437 | 436 | 352 | 355 | 458 | 369 | 233 | 266 | 299 |
| Hampshire                    | 12 | 18404 | 1820 | 884  | 1063 | 722 | 654 | 666 | 482 | 495 | 389 | 429 | 405 | 434 | 437 | 376 | 353 | 326 | 286 | 221 | 271 | 300 |
| Oxfordshire                  | 12 | 18481 | 1815 | 846  | 1155 | 716 | 642 | 664 | 479 | 483 | 396 | 415 | 382 | 434 | 435 | 356 | 354 | 346 | 299 | 283 | 288 | 289 |
| South Gloucestershire        | 11 | 18324 | 1819 | 914  | 1067 | 718 | 638 | 665 | 486 | 456 | 376 | 398 | 302 | 438 | 436 | 354 | 356 | 450 | 371 | 241 | 253 | 291 |
| Kingston upon Thames         | 11 | 18140 | 1812 | 927  | 1075 | 721 | 650 | 666 | 511 | 427 | 385 | 377 | 300 | 430 | 438 | 405 | 354 | 360 | 343 | 255 | 314 | 310 |
| Bracknell Forest             | 10 | 18522 | 1818 | 904  | 1072 | 722 | 636 | 666 | 572 | 504 | 421 | 451 | 273 | 443 | 437 | 358 | 356 | 305 | 329 | 242 | 342 | 200 |
| West Berkshire               | 10 | 18710 | 1817 | 886  | 1072 | 720 | 623 | 666 | 522 | 518 | 426 | 431 | 253 | 437 | 436 | 368 | 355 | 336 | 329 | 235 | 309 | 315 |
| Richmond upon Thames         | 10 | 17723 | 1817 | 767  | 1081 | 726 | 645 | 668 | 463 | 368 | 376 | 399 | 332 | 421 | 440 | 398 | 354 | 379 | 286 | 253 | 255 | 281 |
| Buckinghamshire              | 10 | 18367 | 1821 | 867  | 1067 | 723 | 648 | 667 | 425 | 461 | 373 | 441 | 380 | 432 | 437 | 358 | 355 | 318 | 316 | 314 | 276 | 300 |
| Rutland                      | 10 | 19137 | 1814 | 1144 | 1034 | 703 | 679 | 657 | 431 | 527 | 436 | 489 | 373 | 436 | 429 | 348 | 357 | 312 | 417 | 377 | 266 | 274 |
| Surrey                       | 9  | 18114 | 1819 | 816  | 1114 | 721 | 639 | 666 | 457 | 470 | 375 | 406 | 345 | 434 | 437 | 352 | 354 | 338 | 302 | 251 | 315 | 271 |
| Windsor and Maidenhead       | 9  | 18624 | 1819 | 1000 | 1080 | 720 | 627 | 665 | 532 | 527 | 400 | 433 | 285 | 440 | 436 | 361 | 357 | 316 | 237 | 281 | 354 | 339 |
| Wokingham                    | 6  | 17775 | 1819 | 817  | 1072 | 722 | 637 | 668 | 413 | 457 | 350 | 438 | 275 | 437 | 437 | 357 | 354 | 308 | 273 | 294 | 300 | 303 |

 Statistically significantly lower than the England mean  
 Statistically significantly higher than the England mean

**Appendix Figure 2:** Age-standardised years of life lost (YLLs) rate per 100,000 population, for the 20 causes with the highest national YLL burden and decreasing Upper Tier Local Authority (UTLA) deprivation (Index of Multiple Deprivation [IMD] score), England both sexes, 2016

| Upper Tier Local Authority         | IMD score | All causes       | Ischaemic heart disease | Trachea, bronchus, and lung cancer | Cerebrovascular disease | Chronic obstructive pulmonary disease | Alzheimer's disease and other dementias | Lower respiratory infections | Self-harm     | Cirrhosis and other chronic liver diseases | Colon and rectum cancer | Breast cancer | Neonatal preterm birth | Congenital birth defects | Other cardiovascular and circulatory diseases | Road injuries | Pancreatic cancer | Drug use disorders | Other neoplasms | Oesophageal cancer | Brain and nervous system cancer | Prostate cancer |
|------------------------------------|-----------|------------------|-------------------------|------------------------------------|-------------------------|---------------------------------------|-----------------------------------------|------------------------------|---------------|--------------------------------------------|-------------------------|---------------|------------------------|--------------------------|-----------------------------------------------|---------------|-------------------|--------------------|-----------------|--------------------|---------------------------------|-----------------|
| England (95% uncertainty interval) |           | 8941 (8847-9029) | 1040 (1018-1071)        | 623 (608-642)                      | 431 (407-452)           | 408 (391-445)                         | 345 (296-411)                           | 336 (314-356)                | 326 (278-359) | 302 (292-312)                              | 286 (276-298)           | 271 (261-282) | 262 (237-273)          | 238 (224-276)            | 174 (168-180)                                 | 170 (163-180) | 170 (165-175)     | 167 (152-177)      | 149 (143-154)   | 143 (136-149)      | 139 (112-148)                   | 139 (129-161)   |
| Blackpool                          | 42        | 14274            | 1708                    | 1012                               | 761                     | 718                                   | 359                                     | 570                          | 665           | 742                                        | 429                     | 374           | 359                    | 264                      | 286                                           | 293           | 234               | 301                | 211             | 225                | 170                             | 173             |
| Knowsley                           | 41        | 11033            | 1379                    | 1112                               | 509                     | 746                                   | 354                                     | 481                          | 256           | 362                                        | 356                     | 293           | 218                    | 269                      | 171                                           | 192           | 191               | 178                | 171             | 195                | 150                             | 139             |
| Kingston upon Hull, City of        | 41        | 11501            | 1448                    | 1086                               | 602                     | 732                                   | 353                                     | 450                          | 443           | 336                                        | 357                     | 305           | 257                    | 224                      | 208                                           | 199           | 198               | 172                | 190             | 179                | 170                             | 148             |
| Liverpool                          | 41        | 11607            | 1268                    | 1094                               | 525                     | 691                                   | 356                                     | 511                          | 304           | 537                                        | 361                     | 285           | 326                    | 274                      | 199                                           | 176           | 189               | 429                | 165             | 198                | 130                             | 151             |
| Manchester                         | 41        | 11729            | 1483                    | 1045                               | 598                     | 738                                   | 353                                     | 468                          | 316           | 531                                        | 343                     | 275           | 345                    | 241                      | 240                                           | 147           | 192               | 352                | 150             | 186                | 124                             | 138             |
| Middlesbrough                      | 40        | 11693            | 1398                    | 1073                               | 629                     | 670                                   | 355                                     | 494                          | 415           | 413                                        | 396                     | 310           | 271                    | 223                      | 193                                           | 209           | 201               | 164                | 224             | 171                | 144                             | 152             |
| Birmingham                         | 38        | 10369            | 1254                    | 690                                | 490                     | 482                                   | 347                                     | 391                          | 280           | 379                                        | 304                     | 263           | 571                    | 329                      | 176                                           | 159           | 176               | 277                | 150             | 160                | 122                             | 134             |
| Nottingham                         | 37        | 11313            | 1337                    | 876                                | 533                     | 635                                   | 353                                     | 420                          | 364           | 421                                        | 352                     | 305           | 417                    | 359                      | 229                                           | 171           | 206               | 146                | 183             | 176                | 151                             | 154             |
| Tower Hamlets                      | 36        | 9629             | 1186                    | 849                                | 392                     | 560                                   | 334                                     | 332                          | 226           | 338                                        | 268                     | 219           | 286                    | 218                      | 186                                           | 124           | 184               | 354                | 138             | 136                | 126                             | 129             |
| Hackney                            | 35        | 9388             | 1128                    | 705                                | 368                     | 435                                   | 333                                     | 327                          | 237           | 355                                        | 244                     | 242           | 354                    | 169                      | 187                                           | 136           | 176               | 323                | 142             | 126                | 136                             | 145             |
| Barking and Dagenham               | 35        | 10617            | 1364                    | 944                                | 447                     | 634                                   | 348                                     | 471                          | 290           | 319                                        | 308                     | 325           | 245                    | 261                      | 209                                           | 175           | 204               | 71                 | 204             | 152                | 151                             | 153             |
| Sandwell                           | 35        | 10870            | 1346                    | 791                                | 559                     | 563                                   | 355                                     | 407                          | 331           | 405                                        | 327                     | 306           | 418                    | 351                      | 192                                           | 193           | 193               | 124                | 165             | 168                | 132                             | 142             |
| Stoke-on-Trent                     | 34        | 11847            | 1335                    | 918                                | 484                     | 660                                   | 358                                     | 413                          | 357           | 388                                        | 374                     | 317           | 526                    | 459                      | 222                                           | 190           | 211               | 254                | 207             | 202                | 153                             | 145             |
| Blackburn with Darwen              | 34        | 11464            | 1619                    | 806                                | 595                     | 671                                   | 357                                     | 436                          | 436           | 378                                        | 351                     | 271           | 357                    | 231                      | 181                                           | 211           | 186               | 269                | 179             | 196                | 171                             | 134             |
| Rochdale                           | 34        | 11150            | 1497                    | 852                                | 619                     | 634                                   | 360                                     | 440                          | 389           | 406                                        | 313                     | 303           | 276                    | 235                      | 205                                           | 203           | 188               | 226                | 183             | 175                | 143                             | 144             |
| Wolverhampton                      | 33        | 11114            | 1356                    | 767                                | 574                     | 513                                   | 354                                     | 418                          | 369           | 473                                        | 356                     | 314           | 415                    | 294                      | 214                                           | 196           | 204               | 154                | 188             | 182                | 152                             | 162             |
| Hartlepool                         | 33        | 10961            | 1291                    | 1011                               | 588                     | 560                                   | 353                                     | 426                          | 383           | 480                                        | 337                     | 287           | 277                    | 184                      | 158                                           | 200           | 213               | 163                | 195             | 155                | 131                             | 128             |
| Bradford                           | 33        | 10379            | 1339                    | 729                                | 550                     | 583                                   | 354                                     | 415                          | 336           | 328                                        | 284                     | 255           | 415                    | 333                      | 181                                           | 192           | 167               | 241                | 168             | 140                | 132                             | 132             |
| Leicester                          | 33        | 10691            | 1494                    | 687                                | 537                     | 520                                   | 355                                     | 470                          | 334           | 405                                        | 296                     | 287           | 396                    | 325                      | 197                                           | 180           | 180               | 157                | 157             | 152                | 122                             | 145             |
| Salford                            | 33        | 11502            | 1424                    | 1003                               | 561                     | 688                                   | 355                                     | 482                          | 372           | 433                                        | 366                     | 294           | 279                    | 266                      | 243                                           | 202           | 195               | 214                | 173             | 195                | 149                             | 140             |
| Newham                             | 33        | 9408             | 1259                    | 703                                | 420                     | 522                                   | 340                                     | 396                          | 261           | 348                                        | 261                     | 250           | 254                    | 194                      | 179                                           | 140           | 185               | 92                 | 159             | 132                | 116                             | 147             |
| Islington                          | 33        | 9381             | 1077                    | 792                                | 363                     | 465                                   | 336                                     | 367                          | 272           | 394                                        | 261                     | 258           | 181                    | 201                      | 204                                           | 147           | 175               | 334                | 126             | 138                | 133                             | 130             |
| Halton                             | 32        | 10598            | 1314                    | 918                                | 511                     | 577                                   | 356                                     | 475                          | 366           | 360                                        | 334                     | 321           | 231                    | 247                      | 187                                           | 185           | 202               | 99                 | 182             | 183                | 149                             | 133             |
| Haringey                           | 31        | 8890             | 1072                    | 591                                | 396                     | 381                                   | 337                                     | 357                          | 318           | 336                                        | 248                     | 272           | 233                    | 166                      | 188                                           | 201           | 174               | 155                | 116             | 114                | 134                             | 142             |
| North East Lincolnshire            | 31        | 10525            | 1384                    | 773                                | 516                     | 551                                   | 352                                     | 382                          | 448           | 420                                        | 330                     | 301           | 249                    | 272                      | 161                                           | 224           | 180               | 122                | 191             | 173                | 169                             | 165             |
| South Tyneside                     | 31        | 10223            | 1160                    | 996                                | 527                     | 580                                   | 354                                     | 373                          | 356           | 418                                        | 328                     | 282           | 139                    | 184                      | 173                                           | 190           | 184               | 241                | 203             | 155                | 146                             | 129             |

|                        |    |       |      |      |     |     |     |     |     |     |     |     |     |     |     |     |     |     |     |     |     |     |
|------------------------|----|-------|------|------|-----|-----|-----|-----|-----|-----|-----|-----|-----|-----|-----|-----|-----|-----|-----|-----|-----|-----|
| Walsall                | 30 | 10742 | 1362 | 717  | 487 | 532 | 351 | 366 | 311 | 333 | 324 | 301 | 537 | 345 | 181 | 200 | 175 | 207 | 165 | 176 | 146 | 141 |
| Oldham                 | 30 | 11130 | 1445 | 842  | 604 | 637 | 365 | 400 | 384 | 422 | 332 | 315 | 352 | 303 | 211 | 194 | 194 | 161 | 164 | 167 | 148 | 144 |
| Waltham Forest         | 30 | 9327  | 1212 | 680  | 406 | 441 | 345 | 441 | 319 | 326 | 274 | 281 | 197 | 226 | 192 | 179 | 198 | 135 | 152 | 137 | 126 | 153 |
| St Helens              | 30 | 11057 | 1428 | 854  | 541 | 658 | 358 | 504 | 396 | 486 | 361 | 318 | 219 | 230 | 187 | 207 | 198 | 130 | 159 | 192 | 145 | 148 |
| Sunderland             | 30 | 10872 | 1293 | 949  | 574 | 631 | 357 | 434 | 394 | 418 | 340 | 288 | 239 | 241 | 184 | 197 | 191 | 207 | 188 | 146 | 139 | 135 |
| Barnsley               | 30 | 10565 | 1458 | 826  | 526 | 582 | 356 | 408 | 425 | 250 | 325 | 290 | 240 | 262 | 201 | 203 | 199 | 179 | 165 | 147 | 151 | 136 |
| Southwark              | 29 | 9036  | 932  | 746  | 322 | 514 | 333 | 324 | 278 | 327 | 253 | 245 | 292 | 199 | 199 | 154 | 181 | 181 | 130 | 131 | 108 | 123 |
| Tameside               | 29 | 11156 | 1654 | 912  | 579 | 628 | 360 | 410 | 364 | 393 | 349 | 322 | 218 | 247 | 219 | 196 | 184 | 193 | 170 | 186 | 139 | 146 |
| Doncaster              | 29 | 10832 | 1301 | 876  | 476 | 601 | 356 | 417 | 394 | 364 | 327 | 308 | 317 | 387 | 205 | 205 | 188 | 167 | 190 | 157 | 162 | 149 |
| Lambeth                | 29 | 9461  | 973  | 721  | 375 | 480 | 339 | 341 | 292 | 367 | 255 | 248 | 307 | 222 | 221 | 166 | 183 | 278 | 139 | 126 | 112 | 154 |
| Torbay                 | 29 | 9831  | 1080 | 619  | 492 | 346 | 346 | 333 | 503 | 363 | 322 | 313 | 250 | 407 | 189 | 182 | 183 | 114 | 173 | 173 | 170 | 164 |
| Lewisham               | 29 | 9494  | 1080 | 763  | 427 | 519 | 346 | 448 | 264 | 314 | 291 | 296 | 292 | 200 | 185 | 138 | 190 | 180 | 141 | 143 | 127 | 151 |
| Redcar and Cleveland   | 29 | 10298 | 1300 | 861  | 555 | 527 | 354 | 401 | 423 | 361 | 360 | 329 | 188 | 158 | 184 | 209 | 183 | 72  | 196 | 167 | 149 | 148 |
| Bolton                 | 28 | 10225 | 1291 | 715  | 572 | 556 | 358 | 452 | 416 | 375 | 300 | 280 | 270 | 233 | 187 | 199 | 173 | 172 | 166 | 157 | 145 | 131 |
| Rotherham              | 28 | 10432 | 1402 | 795  | 511 | 511 | 358 | 462 | 413 | 314 | 326 | 300 | 306 | 324 | 162 | 215 | 194 | 107 | 169 | 151 | 164 | 142 |
| Newcastle upon Tyne    | 28 | 10443 | 1124 | 1003 | 486 | 563 | 337 | 366 | 346 | 415 | 319 | 288 | 243 | 220 | 219 | 160 | 187 | 282 | 174 | 141 | 144 | 129 |
| Coventry               | 28 | 10110 | 1141 | 744  | 490 | 533 | 350 | 342 | 331 | 391 | 312 | 281 | 295 | 278 | 187 | 155 | 183 | 161 | 159 | 166 | 138 | 148 |
| Derby                  | 28 | 10164 | 1282 | 711  | 475 | 492 | 353 | 408 | 320 | 341 | 319 | 293 | 385 | 297 | 212 | 164 | 190 | 94  | 162 | 165 | 153 | 146 |
| Westminster            | 28 | 7254  | 721  | 528  | 230 | 280 | 316 | 213 | 347 | 346 | 209 | 190 | 165 | 147 | 165 | 135 | 143 | 253 | 104 | 95  | 113 | 112 |
| Peterborough           | 28 | 9764  | 1201 | 636  | 461 | 468 | 349 | 384 | 459 | 349 | 294 | 282 | 222 | 224 | 188 | 219 | 172 | 135 | 167 | 147 | 169 | 149 |
| Luton                  | 28 | 9751  | 1197 | 651  | 440 | 448 | 349 | 388 | 321 | 323 | 283 | 272 | 341 | 284 | 195 | 181 | 163 | 192 | 151 | 127 | 129 | 153 |
| Sheffield              | 28 | 9482  | 1158 | 722  | 475 | 445 | 351 | 307 | 296 | 281 | 306 | 279 | 311 | 290 | 174 | 142 | 181 | 205 | 157 | 138 | 146 | 141 |
| Bristol, City of       | 27 | 9085  | 993  | 679  | 414 | 418 | 348 | 335 | 295 | 323 | 292 | 268 | 222 | 222 | 184 | 133 | 178 | 254 | 142 | 152 | 148 | 140 |
| Portsmouth             | 27 | 9999  | 1200 | 763  | 517 | 525 | 352 | 353 | 342 | 443 | 313 | 285 | 162 | 187 | 234 | 152 | 191 | 86  | 178 | 172 | 147 | 158 |
| Enfield                | 27 | 8027  | 984  | 551  | 377 | 332 | 337 | 321 | 249 | 237 | 245 | 278 | 237 | 213 | 153 | 162 | 163 | 78  | 122 | 102 | 126 | 115 |
| Wakefield              | 27 | 10002 | 1275 | 813  | 506 | 537 | 354 | 422 | 375 | 324 | 311 | 257 | 250 | 206 | 184 | 225 | 176 | 182 | 165 | 137 | 146 | 142 |
| Wirral                 | 27 | 10447 | 1143 | 793  | 533 | 516 | 352 | 397 | 403 | 482 | 320 | 316 | 282 | 300 | 179 | 194 | 199 | 185 | 179 | 178 | 152 | 142 |
| Southampton            | 27 | 9567  | 1111 | 738  | 447 | 515 | 348 | 331 | 347 | 342 | 302 | 275 | 209 | 210 | 219 | 147 | 193 | 167 | 179 | 167 | 143 | 133 |
| Brent                  | 27 | 8104  | 1026 | 511  | 359 | 313 | 329 | 299 | 268 | 314 | 220 | 228 | 262 | 178 | 172 | 147 | 157 | 163 | 125 | 107 | 120 | 129 |
| Plymouth               | 27 | 9727  | 1121 | 720  | 424 | 420 | 346 | 347 | 359 | 321 | 294 | 243 | 236 | 329 | 231 | 146 | 188 | 175 | 200 | 170 | 154 | 155 |
| Leeds                  | 27 | 9642  | 1253 | 788  | 437 | 486 | 345 | 344 | 328 | 347 | 292 | 260 | 280 | 232 | 183 | 176 | 173 | 247 | 163 | 135 | 144 | 146 |
| Gateshead              | 26 | 10408 | 1256 | 947  | 497 | 548 | 353 | 386 | 322 | 372 | 321 | 274 | 279 | 240 | 200 | 189 | 168 | 276 | 189 | 146 | 142 | 129 |
| County Durham          | 26 | 10322 | 1266 | 838  | 555 | 566 | 353 | 359 | 434 | 379 | 321 | 275 | 248 | 243 | 196 | 224 | 176 | 205 | 168 | 139 | 140 | 142 |
| Sefton                 | 26 | 10674 | 1214 | 844  | 491 | 542 | 358 | 388 | 392 | 428 | 349 | 311 | 292 | 287 | 178 | 201 | 188 | 254 | 164 | 182 | 155 | 154 |
| Greenwich              | 26 | 9211  | 1058 | 751  | 450 | 540 | 351 | 352 | 286 | 328 | 273 | 263 | 279 | 252 | 170 | 151 | 182 | 127 | 147 | 136 | 134 | 140 |
| Camden                 | 25 | 7821  | 764  | 572  | 261 | 339 | 321 | 257 | 281 | 349 | 231 | 224 | 185 | 130 | 160 | 149 | 153 | 422 | 116 | 100 | 124 | 117 |
| Wigan                  | 25 | 10890 | 1452 | 842  | 582 | 631 | 359 | 479 | 450 | 410 | 352 | 292 | 235 | 248 | 217 | 185 | 167 | 187 | 171 | 190 | 134 | 142 |
| Telford and Wrekin     | 25 | 10452 | 1263 | 744  | 561 | 484 | 359 | 404 | 303 | 364 | 329 | 304 | 400 | 334 | 193 | 170 | 176 | 120 | 200 | 176 | 152 | 156 |
| Stockton-on-Tees       | 25 | 9887  | 1164 | 814  | 516 | 449 | 350 | 394 | 360 | 378 | 315 | 274 | 292 | 157 | 175 | 207 | 184 | 153 | 202 | 160 | 152 | 135 |
| Calderdale             | 25 | 10330 | 1299 | 754  | 508 | 567 | 356 | 410 | 461 | 348 | 301 | 278 | 282 | 268 | 196 | 204 | 179 | 144 | 198 | 165 | 143 | 146 |
| Southend-on-Sea        | 25 | 9527  | 1084 | 668  | 447 | 430 | 350 | 383 | 440 | 292 | 289 | 306 | 208 | 268 | 198 | 158 | 178 | 126 | 158 | 151 | 158 | 145 |
| Hammersmith and Fulham | 24 | 8604  | 913  | 680  | 296 | 441 | 328 | 269 | 311 | 413 | 262 | 237 | 220 | 171 | 196 | 175 | 171 | 118 | 117 | 135 | 121 | 122 |
| Kirklees               | 24 | 9697  | 1225 | 676  | 529 | 452 | 353 | 395 | 372 | 305 | 281 | 252 | 354 | 314 | 185 | 194 | 169 | 135 | 174 | 132 | 138 | 132 |
| Cornwall               | 24 | 8790  | 985  | 511  | 436 | 334 | 341 | 278 | 423 | 252 | 264 | 265 | 313 | 277 | 201 | 192 | 171 | 184 | 154 | 145 | 140 | 145 |
| Croydon                | 24 | 8622  | 1020 | 561  | 419 | 431 | 347 | 354 | 287 | 284 | 258 | 274 | 238 | 251 | 191 | 152 | 168 | 135 | 122 | 114 | 136 | 131 |
| Darlington             | 24 | 9954  | 1212 | 729  | 510 | 426 | 353 | 345 | 535 | 323 | 329 | 284 | 243 | 165 | 200 | 179 | 177 | 95  | 192 | 165 | 157 | 140 |

|                           |    |       |      |     |     |     |     |     |     |     |     |     |     |     |     |     |     |     |     |     |     |     |
|---------------------------|----|-------|------|-----|-----|-----|-----|-----|-----|-----|-----|-----|-----|-----|-----|-----|-----|-----|-----|-----|-----|-----|
| Ealing                    | 24 | 8179  | 1035 | 531 | 341 | 337 | 336 | 377 | 271 | 342 | 233 | 230 | 202 | 170 | 163 | 150 | 155 | 170 | 117 | 106 | 119 | 127 |
| Brighton and Hove         | 23 | 9380  | 877  | 649 | 395 | 380 | 343 | 302 | 415 | 369 | 309 | 274 | 244 | 262 | 194 | 160 | 191 | 288 | 158 | 154 | 148 | 148 |
| Kensington and Chelsea    | 23 | 6578  | 572  | 467 | 211 | 272 | 310 | 195 | 362 | 327 | 202 | 197 | 162 | 108 | 126 | 122 | 138 | 148 | 114 | 80  | 121 | 110 |
| Isle of Wight             | 23 | 8335  | 962  | 519 | 377 | 281 | 334 | 281 | 463 | 339 | 265 | 275 | 112 | 194 | 184 | 160 | 158 | 93  | 149 | 144 | 146 | 137 |
| Dudley                    | 23 | 9759  | 1094 | 619 | 494 | 485 | 350 | 340 | 350 | 340 | 329 | 305 | 339 | 367 | 169 | 182 | 173 | 149 | 157 | 161 | 135 | 148 |
| Slough                    | 23 | 9535  | 1263 | 671 | 410 | 462 | 351 | 449 | 310 | 364 | 264 | 248 | 267 | 282 | 201 | 192 | 169 | 164 | 158 | 139 | 125 | 145 |
| Lancashire                | 22 | 9773  | 1170 | 670 | 498 | 466 | 348 | 393 | 365 | 427 | 289 | 266 | 322 | 261 | 189 | 173 | 162 | 320 | 138 | 166 | 134 | 126 |
| Hounslow                  | 22 | 8417  | 998  | 593 | 347 | 394 | 338 | 339 | 263 | 337 | 236 | 239 | 253 | 208 | 167 | 160 | 163 | 131 | 124 | 120 | 131 | 128 |
| Medway                    | 22 | 9600  | 1085 | 720 | 418 | 543 | 354 | 353 | 328 | 323 | 338 | 305 | 214 | 214 | 195 | 157 | 171 | 106 | 175 | 156 | 140 | 161 |
| Bournemouth               | 22 | 9263  | 1024 | 622 | 493 | 336 | 350 | 335 | 428 | 435 | 323 | 277 | 168 | 191 | 188 | 140 | 185 | 155 | 160 | 159 | 154 | 157 |
| Bury                      | 22 | 10616 | 1377 | 815 | 582 | 566 | 362 | 422 | 370 | 368 | 336 | 305 | 259 | 251 | 200 | 197 | 188 | 113 | 169 | 181 | 147 | 153 |
| Thurrock                  | 22 | 8913  | 1123 | 674 | 405 | 481 | 348 | 347 | 298 | 247 | 270 | 277 | 178 | 239 | 164 | 144 | 155 | 124 | 158 | 136 | 135 | 141 |
| North Lincolnshire        | 21 | 9982  | 1281 | 715 | 511 | 503 | 351 | 364 | 442 | 314 | 324 | 303 | 265 | 228 | 154 | 238 | 170 | 97  | 178 | 165 | 161 | 148 |
| Cumbria                   | 21 | 9360  | 1134 | 611 | 483 | 398 | 347 | 280 | 395 | 331 | 299 | 276 | 215 | 272 | 190 | 225 | 172 | 211 | 166 | 146 | 146 | 136 |
| North Tyneside            | 21 | 10173 | 1157 | 934 | 505 | 496 | 351 | 376 | 370 | 413 | 320 | 271 | 175 | 188 | 207 | 165 | 182 | 189 | 200 | 144 | 140 | 153 |
| Norfolk                   | 21 | 8499  | 938  | 516 | 410 | 298 | 340 | 270 | 348 | 237 | 278 | 286 | 252 | 247 | 170 | 213 | 164 | 259 | 147 | 139 | 143 | 140 |
| Lincolnshire              | 21 | 9014  | 1152 | 569 | 436 | 398 | 346 | 305 | 357 | 258 | 298 | 283 | 238 | 224 | 179 | 249 | 177 | 158 | 153 | 157 | 140 | 148 |
| Northumberland            | 21 | 9908  | 1203 | 790 | 546 | 469 | 356 | 374 | 412 | 325 | 306 | 264 | 205 | 288 | 188 | 205 | 175 | 161 | 163 | 151 | 156 | 149 |
| Redbridge                 | 20 | 8259  | 1103 | 543 | 377 | 324 | 339 | 372 | 286 | 259 | 240 | 271 | 168 | 185 | 160 | 168 | 172 | 100 | 147 | 111 | 136 | 130 |
| Herefordshire, County of  | 20 | 8976  | 1052 | 483 | 475 | 311 | 340 | 255 | 488 | 321 | 307 | 271 | 235 | 298 | 185 | 256 | 165 | 91  | 153 | 156 | 147 | 155 |
| Reading                   | 19 | 9348  | 1019 | 606 | 443 | 442 | 348 | 432 | 308 | 363 | 305 | 270 | 286 | 163 | 198 | 162 | 178 | 101 | 168 | 153 | 162 | 153 |
| Warrington                | 19 | 9892  | 1280 | 727 | 517 | 485 | 358 | 475 | 372 | 336 | 295 | 290 | 280 | 203 | 187 | 192 | 167 | 69  | 156 | 163 | 140 | 152 |
| Bedford                   | 19 | 9443  | 1122 | 566 | 473 | 414 | 357 | 339 | 368 | 290 | 301 | 283 | 251 | 322 | 167 | 219 | 154 | 127 | 169 | 144 | 163 | 172 |
| Stockport                 | 19 | 9688  | 1193 | 717 | 487 | 461 | 349 | 319 | 366 | 349 | 322 | 300 | 289 | 232 | 199 | 187 | 189 | 117 | 161 | 179 | 151 | 146 |
| Northamptonshire          | 19 | 9068  | 980  | 589 | 422 | 432 | 348 | 347 | 308 | 290 | 304 | 277 | 307 | 255 | 190 | 186 | 171 | 195 | 153 | 149 | 134 | 148 |
| Nottinghamshire           | 19 | 9001  | 1013 | 615 | 435 | 427 | 350 | 318 | 314 | 288 | 296 | 297 | 285 | 253 | 168 | 203 | 173 | 127 | 157 | 141 | 140 | 149 |
| East Sussex               | 19 | 8656  | 849  | 533 | 360 | 304 | 339 | 292 | 417 | 272 | 296 | 306 | 218 | 294 | 163 | 186 | 174 | 192 | 142 | 141 | 150 | 142 |
| Kent                      | 19 | 8268  | 908  | 551 | 398 | 380 | 341 | 313 | 302 | 264 | 272 | 272 | 207 | 181 | 185 | 157 | 176 | 204 | 132 | 146 | 132 | 139 |
| Derbyshire                | 19 | 8921  | 1109 | 583 | 445 | 401 | 349 | 338 | 298 | 288 | 298 | 278 | 233 | 235 | 184 | 166 | 159 | 158 | 148 | 153 | 142 | 138 |
| Suffolk                   | 18 | 8018  | 921  | 493 | 391 | 280 | 343 | 283 | 325 | 228 | 282 | 275 | 206 | 223 | 167 | 180 | 164 | 144 | 145 | 135 | 146 | 135 |
| Wandsworth                | 18 | 8336  | 958  | 640 | 350 | 428 | 337 | 362 | 268 | 282 | 246 | 241 | 197 | 139 | 176 | 125 | 165 | 119 | 123 | 105 | 136 | 137 |
| Hillingdon                | 18 | 8667  | 1006 | 622 | 356 | 370 | 335 | 351 | 301 | 306 | 278 | 270 | 213 | 208 | 169 | 145 | 179 | 138 | 140 | 130 | 153 | 145 |
| Cheshire West and Chester | 18 | 9095  | 1047 | 636 | 439 | 414 | 349 | 322 | 364 | 315 | 314 | 281 | 263 | 198 | 186 | 185 | 164 | 168 | 155 | 162 | 140 | 141 |
| Milton Keynes             | 18 | 8985  | 986  | 644 | 412 | 449 | 350 | 455 | 336 | 233 | 273 | 268 | 295 | 236 | 186 | 156 | 169 | 125 | 152 | 131 | 135 | 144 |
| Havering                  | 18 | 8537  | 1058 | 651 | 383 | 418 | 345 | 361 | 268 | 268 | 278 | 297 | 159 | 185 | 156 | 159 | 169 | 82  | 156 | 131 | 161 | 140 |
| Swindon                   | 18 | 8926  | 1085 | 656 | 417 | 430 | 354 | 393 | 308 | 266 | 299 | 267 | 218 | 149 | 191 | 148 | 162 | 112 | 162 | 165 | 139 | 147 |
| Barnet                    | 18 | 7538  | 907  | 494 | 324 | 283 | 334 | 315 | 288 | 223 | 236 | 264 | 174 | 158 | 141 | 146 | 164 | 106 | 122 | 102 | 137 | 114 |
| Somerset                  | 18 | 8246  | 860  | 467 | 402 | 306 | 344 | 269 | 385 | 250 | 286 | 264 | 252 | 280 | 165 | 207 | 160 | 121 | 144 | 141 | 151 | 136 |
| Worcestershire            | 18 | 8814  | 933  | 518 | 471 | 353 | 347 | 344 | 367 | 301 | 304 | 277 | 290 | 293 | 167 | 198 | 161 | 124 | 149 | 148 | 144 | 142 |
| Solihull                  | 17 | 8370  | 919  | 559 | 385 | 310 | 340 | 261 | 298 | 256 | 285 | 275 | 267 | 360 | 135 | 186 | 156 | 107 | 154 | 140 | 150 | 130 |
| Essex                     | 17 | 8194  | 913  | 552 | 392 | 365 | 342 | 296 | 298 | 233 | 274 | 289 | 243 | 200 | 156 | 151 | 173 | 173 | 139 | 131 | 129 | 138 |
| Devon                     | 17 | 8146  | 876  | 470 | 392 | 262 | 340 | 278 | 385 | 239 | 283 | 273 | 249 | 242 | 162 | 158 | 168 | 173 | 147 | 136 | 147 | 151 |
| Shropshire                | 17 | 8818  | 1047 | 537 | 480 | 356 | 349 | 301 | 399 | 252 | 311 | 283 | 237 | 227 | 156 | 234 | 169 | 115 | 164 | 163 | 153 | 149 |
| Staffordshire             | 16 | 8890  | 1002 | 540 | 440 | 380 | 348 | 309 | 326 | 282 | 289 | 261 | 377 | 289 | 155 | 182 | 160 | 156 | 150 | 158 | 134 | 132 |
| Bexley                    | 16 | 8160  | 1002 | 655 | 361 | 393 | 338 | 259 | 283 | 254 | 265 | 256 | 169 | 227 | 158 | 130 | 165 | 76  | 143 | 140 | 138 | 137 |
| East Riding of Yorkshire  | 16 | 8912  | 1108 | 605 | 488 | 394 | 346 | 320 | 390 | 264 | 289 | 296 | 177 | 303 | 163 | 212 | 162 | 69  | 151 | 141 | 163 | 137 |

|                              |    |      |      |     |     |     |     |     |     |     |     |     |     |     |     |     |     |     |     |     |     |     |
|------------------------------|----|------|------|-----|-----|-----|-----|-----|-----|-----|-----|-----|-----|-----|-----|-----|-----|-----|-----|-----|-----|-----|
| North Somerset               | 16 | 8858 | 938  | 528 | 474 | 314 | 354 | 310 | 337 | 277 | 282 | 301 | 216 | 330 | 159 | 160 | 177 | 160 | 149 | 146 | 160 | 154 |
| Trafford                     | 15 | 8777 | 1116 | 683 | 439 | 410 | 346 | 277 | 328 | 312 | 295 | 248 | 194 | 180 | 180 | 147 | 152 | 139 | 152 | 149 | 139 | 132 |
| Poole                        | 15 | 8136 | 860  | 534 | 394 | 310 | 348 | 303 | 374 | 309 | 271 | 268 | 165 | 235 | 147 | 133 | 173 | 96  | 148 | 146 | 155 | 149 |
| Bromley                      | 15 | 7719 | 917  | 535 | 354 | 333 | 338 | 275 | 295 | 264 | 267 | 269 | 145 | 171 | 137 | 141 | 166 | 86  | 137 | 118 | 150 | 130 |
| Gloucestershire              | 15 | 8055 | 891  | 486 | 403 | 323 | 344 | 314 | 345 | 263 | 270 | 261 | 200 | 221 | 142 | 184 | 170 | 192 | 132 | 124 | 142 | 129 |
| Warwickshire                 | 15 | 8627 | 934  | 537 | 422 | 332 | 345 | 322 | 346 | 283 | 261 | 270 | 304 | 268 | 160 | 192 | 161 | 135 | 149 | 138 | 135 | 136 |
| Merton                       | 15 | 7835 | 947  | 562 | 317 | 378 | 335 | 293 | 281 | 230 | 263 | 256 | 208 | 182 | 164 | 127 | 163 | 77  | 119 | 120 | 140 | 134 |
| North Yorkshire              | 15 | 8429 | 1070 | 512 | 479 | 327 | 344 | 280 | 397 | 254 | 278 | 267 | 220 | 224 | 157 | 226 | 153 | 123 | 155 | 136 | 143 | 135 |
| Sutton                       | 15 | 7996 | 920  | 592 | 350 | 413 | 343 | 323 | 316 | 221 | 248 | 266 | 168 | 234 | 159 | 149 | 157 | 106 | 138 | 117 | 155 | 128 |
| Dorset                       | 14 | 7798 | 793  | 455 | 358 | 244 | 336 | 243 | 385 | 266 | 259 | 271 | 230 | 223 | 149 | 216 | 161 | 120 | 148 | 134 | 152 | 130 |
| Harrow                       | 14 | 7365 | 921  | 450 | 273 | 280 | 326 | 263 | 276 | 235 | 214 | 232 | 298 | 169 | 137 | 143 | 148 | 60  | 120 | 102 | 128 | 116 |
| Cheshire East                | 14 | 8612 | 986  | 526 | 451 | 356 | 348 | 314 | 362 | 273 | 276 | 269 | 233 | 278 | 174 | 190 | 164 | 124 | 149 | 150 | 142 | 128 |
| West Sussex                  | 14 | 8176 | 848  | 511 | 386 | 305 | 343 | 299 | 351 | 255 | 274 | 294 | 212 | 227 | 171 | 180 | 179 | 146 | 140 | 140 | 149 | 139 |
| Wiltshire                    | 13 | 7915 | 842  | 465 | 387 | 289 | 346 | 312 | 327 | 231 | 270 | 265 | 225 | 248 | 150 | 211 | 158 | 107 | 139 | 127 | 143 | 132 |
| Cambridgeshire               | 13 | 7513 | 814  | 474 | 349 | 294 | 343 | 251 | 294 | 207 | 250 | 232 | 204 | 210 | 166 | 170 | 159 | 134 | 132 | 116 | 133 | 132 |
| Leicestershire               | 12 | 8148 | 964  | 499 | 370 | 321 | 343 | 310 | 308 | 252 | 264 | 257 | 291 | 203 | 152 | 179 | 159 | 110 | 148 | 131 | 145 | 136 |
| York                         | 12 | 8641 | 1102 | 588 | 446 | 408 | 346 | 289 | 377 | 247 | 315 | 263 | 181 | 274 | 180 | 167 | 150 | 62  | 161 | 142 | 144 | 140 |
| Central Bedfordshire         | 12 | 7798 | 895  | 527 | 348 | 361 | 342 | 299 | 262 | 221 | 260 | 248 | 143 | 202 | 155 | 184 | 151 | 118 | 131 | 133 | 137 | 138 |
| Hertfordshire                | 12 | 7601 | 848  | 523 | 360 | 338 | 340 | 324 | 247 | 208 | 257 | 263 | 180 | 168 | 165 | 134 | 161 | 148 | 122 | 114 | 130 | 135 |
| Bath and North East Somerset | 12 | 7512 | 807  | 459 | 358 | 262 | 343 | 263 | 290 | 223 | 258 | 234 | 147 | 249 | 154 | 138 | 158 | 120 | 138 | 127 | 156 | 145 |
| Hampshire                    | 12 | 7438 | 790  | 474 | 360 | 298 | 340 | 269 | 291 | 214 | 254 | 258 | 135 | 184 | 152 | 148 | 160 | 147 | 134 | 120 | 136 | 132 |
| Oxfordshire                  | 12 | 7494 | 752  | 470 | 347 | 302 | 340 | 285 | 280 | 241 | 265 | 248 | 201 | 205 | 150 | 153 | 161 | 128 | 131 | 121 | 136 | 137 |
| South Gloucestershire        | 11 | 7389 | 818  | 478 | 321 | 285 | 343 | 251 | 282 | 224 | 244 | 229 | 158 | 245 | 131 | 159 | 144 | 87  | 137 | 136 | 153 | 131 |
| Kingston upon Thames         | 11 | 7196 | 830  | 501 | 297 | 293 | 335 | 311 | 300 | 265 | 210 | 227 | 172 | 233 | 138 | 120 | 137 | 53  | 111 | 107 | 129 | 122 |
| Bracknell Forest             | 10 | 7596 | 811  | 562 | 365 | 327 | 349 | 339 | 192 | 244 | 239 | 246 | 157 | 225 | 147 | 167 | 171 | 43  | 129 | 123 | 129 | 123 |
| West Berkshire               | 10 | 7780 | 793  | 513 | 375 | 329 | 343 | 306 | 306 | 288 | 283 | 255 | 158 | 236 | 150 | 165 | 172 | 23  | 144 | 131 | 150 | 134 |
| Richmond upon Thames         | 10 | 6734 | 671  | 453 | 242 | 284 | 327 | 253 | 272 | 283 | 207 | 216 | 173 | 180 | 127 | 118 | 129 | 83  | 107 | 101 | 117 | 110 |
| Buckinghamshire              | 10 | 7384 | 773  | 418 | 327 | 282 | 337 | 274 | 292 | 213 | 240 | 254 | 229 | 220 | 155 | 158 | 160 | 133 | 134 | 108 | 139 | 126 |
| Rutland                      | 10 | 8131 | 1037 | 425 | 389 | 341 | 342 | 263 | 266 | 209 | 215 | 313 | 274 | 303 | 141 | 175 | 98  | 114 | 164 | 85  | 103 | 110 |
| Surrey                       | 9  | 7154 | 722  | 449 | 335 | 284 | 340 | 313 | 262 | 223 | 247 | 243 | 169 | 192 | 149 | 131 | 155 | 104 | 120 | 112 | 134 | 126 |
| Windsor and Maidenhead       | 9  | 7748 | 904  | 522 | 385 | 306 | 345 | 351 | 330 | 271 | 266 | 245 | 204 | 135 | 144 | 172 | 156 | 54  | 121 | 120 | 137 | 135 |
| Wokingham                    | 6  | 6888 | 723  | 406 | 321 | 261 | 342 | 297 | 293 | 213 | 239 | 200 | 213 | 170 | 120 | 142 | 136 | 47  | 129 | 114 | 135 | 127 |

 Statistically significantly lower than the England mean  
 Statistically significantly higher than the England mean

**Appendix Figure 3:** Age-standardised years lived with disability (YLDs) rate per 100,000 population for the 20 causes with the highest national YLD burden and decreasing Upper Tier Local Authority (UTLA) deprivation (Index of Multiple Deprivation [IMD]), England, both sexes, 2016

| Upper Tier Local Authority            | IMD score | All causes                    | Low back and neck pain      | Skin and subcutaneous diseases | Migraine                  | Sense organ diseases     | Depressive disorders     | Anxiety disorders        | Falls                    | Oral disorders           | Asthma                   | Other musculoskeletal disorders | Drug use disorders       | Diabetes mellitus        | Bipolar disorder         | Osteoarthritis           | Schizophrenia            | Other mental disorders  | Cerebrovascular disease | Autism spectrum disorders | Upper respiratory infections | Other cardiovascular and circulatory diseases |
|---------------------------------------|-----------|-------------------------------|-----------------------------|--------------------------------|---------------------------|--------------------------|--------------------------|--------------------------|--------------------------|--------------------------|--------------------------|---------------------------------|--------------------------|--------------------------|--------------------------|--------------------------|--------------------------|-------------------------|-------------------------|---------------------------|------------------------------|-----------------------------------------------|
| England<br>(95% uncertainty interval) | NA        | 11054<br>(8211<br>-<br>14261) | 1820<br>(1277<br>-<br>2387) | 1043<br>(705<br>-<br>1482)     | 719<br>(463<br>-<br>1007) | 667<br>(462<br>-<br>922) | 664<br>(454<br>-<br>910) | 435<br>(304<br>-<br>591) | 364<br>(247<br>-<br>509) | 355<br>(217<br>-<br>551) | 348<br>(228<br>-<br>499) | 323<br>(216<br>-<br>461)        | 276<br>(200<br>-<br>356) | 215<br>(146<br>-<br>300) | 211<br>(131<br>-<br>313) | 176<br>(116<br>-<br>254) | 161<br>(120<br>-<br>201) | 141<br>(96<br>-<br>202) | 139<br>(99<br>-<br>176) | 137<br>(93<br>-<br>192)   | 131<br>(78<br>-<br>203)      | 127<br>(87<br>-<br>178)                       |
| Blackpool                             | 42        | 11300                         | 1820                        | 1019                           | 718                       | 695                      | 661                      | 436                      | 459                      | 356                      | 359                      | 291                             | 343                      | 243                      | 206                      | 177                      | 155                      | 141                     | 152                     | 132                       | 131                          | 125                                           |
| Knowsley                              | 41        | 11165                         | 1835                        | 1037                           | 732                       | 666                      | 668                      | 442                      | 394                      | 354                      | 348                      | 298                             | 312                      | 221                      | 210                      | 179                      | 159                      | 140                     | 144                     | 132                       | 131                          | 99                                            |
| Kingston upon Hull, City of           | 41        | 11075                         | 1819                        | 1029                           | 714                       | 674                      | 661                      | 434                      | 372                      | 356                      | 353                      | 308                             | 254                      | 222                      | 208                      | 176                      | 160                      | 142                     | 149                     | 136                       | 131                          | 119                                           |
| Liverpool                             | 41        | 11133                         | 1822                        | 1041                           | 716                       | 660                      | 657                      | 346                      | 413                      | 353                      | 346                      | 309                             | 388                      | 226                      | 209                      | 178                      | 143                      | 142                     | 146                     | 134                       | 131                          | 111                                           |
| Manchester                            | 41        | 11280                         | 1816                        | 1050                           | 711                       | 634                      | 659                      | 433                      | 439                      | 351                      | 353                      | 292                             | 356                      | 237                      | 207                      | 177                      | 161                      | 142                     | 156                     | 133                       | 131                          | 131                                           |
| Middlesbrough                         | 40        | 11142                         | 1825                        | 1029                           | 720                       | 679                      | 663                      | 436                      | 381                      | 359                      | 349                      | 342                             | 254                      | 234                      | 208                      | 184                      | 158                      | 141                     | 149                     | 133                       | 131                          | 110                                           |
| Birmingham                            | 38        | 11141                         | 1823                        | 1035                           | 720                       | 667                      | 664                      | 437                      | 420                      | 354                      | 344                      | 298                             | 347                      | 241                      | 211                      | 174                      | 160                      | 141                     | 144                     | 135                       | 131                          | 105                                           |
| Nottingham                            | 37        | 11182                         | 1819                        | 1041                           | 711                       | 766                      | 661                      | 433                      | 381                      | 356                      | 347                      | 310                             | 259                      | 240                      | 208                      | 176                      | 166                      | 142                     | 149                     | 135                       | 131                          | 132                                           |
| Tower Hamlets                         | 36        | 11156                         | 1795                        | 1071                           | 704                       | 592                      | 657                      | 430                      | 366                      | 347                      | 391                      | 337                             | 325                      | 266                      | 209                      | 173                      | 171                      | 143                     | 154                     | 137                       | 131                          | 121                                           |
| Hackney                               | 35        | 11331                         | 1806                        | 1082                           | 718                       | 584                      | 663                      | 436                      | 372                      | 346                      | 391                      | 362                             | 328                      | 288                      | 208                      | 174                      | 174                      | 141                     | 161                     | 134                       | 131                          | 124                                           |
| Barking and Dagenham                  | 35        | 11183                         | 1816                        | 1112                           | 725                       | 687                      | 666                      | 438                      | 351                      | 355                      | 378                      | 325                             | 245                      | 214                      | 211                      | 175                      | 159                      | 141                     | 131                     | 149                       | 131                          | 111                                           |
| Sandwell                              | 35        | 11146                         | 1821                        | 1023                           | 719                       | 685                      | 664                      | 436                      | 385                      | 356                      | 350                      | 311                             | 303                      | 252                      | 210                      | 174                      | 159                      | 141                     | 146                     | 135                       | 131                          | 116                                           |
| Stoke-on-Trent                        | 34        | 11176                         | 1817                        | 1026                           | 715                       | 677                      | 661                      | 435                      | 471                      | 354                      | 346                      | 327                             | 351                      | 212                      | 207                      | 174                      | 159                      | 142                     | 142                     | 135                       | 131                          | 113                                           |
| Blackburn with Darwen                 | 34        | 11139                         | 1822                        | 1023                           | 718                       | 685                      | 662                      | 435                      | 375                      | 358                      | 351                      | 345                             | 329                      | 230                      | 207                      | 178                      | 158                      | 141                     | 149                     | 134                       | 131                          | 99                                            |
| Rochdale                              | 34        | 11170                         | 1825                        | 1022                           | 722                       | 695                      | 664                      | 437                      | 368                      | 356                      | 349                      | 317                             | 315                      | 231                      | 208                      | 178                      | 157                      | 141                     | 147                     | 134                       | 131                          | 117                                           |
| Wolverhampton                         | 33        | 11178                         | 1820                        | 1027                           | 717                       | 678                      | 663                      | 436                      | 365                      | 352                      | 345                      | 372                             | 311                      | 252                      | 209                      | 174                      | 159                      | 141                     | 147                     | 135                       | 131                          | 127                                           |
| Hartlepool                            | 33        | 11058                         | 1829                        | 1026                           | 725                       | 691                      | 665                      | 438                      | 358                      | 352                      | 346                      | 307                             | 260                      | 228                      | 209                      | 184                      | 157                      | 141                     | 147                     | 133                       | 131                          | 96                                            |
| Bradford                              | 33        | 11098                         | 1825                        | 1024                           | 719                       | 685                      | 663                      | 437                      | 361                      | 359                      | 343                      | 355                             | 278                      | 221                      | 209                      | 177                      | 159                      | 141                     | 147                     | 135                       | 131                          | 117                                           |
| Leicester                             | 33        | 11051                         | 1826                        | 1033                           | 718                       | 670                      | 663                      | 436                      | 388                      | 365                      | 346                      | 291                             | 263                      | 238                      | 210                      | 177                      | 160                      | 142                     | 146                     | 135                       | 131                          | 115                                           |
| Salford                               | 33        | 11169                         | 1817                        | 1037                           | 713                       | 658                      | 660                      | 434                      | 399                      | 354                      | 351                      | 301                             | 325                      | 228                      | 208                      | 177                      | 160                      | 142                     | 150                     | 135                       | 131                          | 127                                           |
| Newham                                | 33        | 10990                         | 1801                        | 1032                           | 704                       | 673                      | 659                      | 431                      | 349                      | 352                      | 382                      | 309                             | 263                      | 235                      | 208                      | 174                      | 161                      | 143                     | 132                     | 138                       | 131                          | 107                                           |
| Islington                             | 33        | 11229                         | 1806                        | 1077                           | 715                       | 597                      | 663                      | 435                      | 373                      | 348                      | 386                      | 340                             | 327                      | 246                      | 209                      | 174                      | 167                      | 141                     | 146                     | 134                       | 131                          | 129                                           |
| Halton                                | 32        | 11168                         | 1826                        | 1039                           | 723                       | 656                      | 665                      | 438                      | 378                      | 357                      | 351                      | 311                             | 289                      | 238                      | 209                      | 178                      | 160                      | 141                     | 146                     | 134                       | 131                          | 110                                           |
| Haringey                              | 31        | 11069                         | 1810                        | 1043                           | 715                       | 669                      | 663                      | 435                      | 343                      | 355                      | 380                      | 327                             | 294                      | 233                      | 209                      | 175                      | 157                      | 142                     | 131                     | 136                       | 131                          | 114                                           |
| North East Lincolnshire               | 31        | 11042                         | 1826                        | 1029                           | 720                       | 667                      | 664                      | 437                      | 342                      | 362                      | 345                      | 330                             | 236                      | 240                      | 209                      | 176                      | 160                      | 141                     | 146                     | 135                       | 131                          | 107                                           |
| South Tyneside                        | 31        | 11119                         | 1830                        | 1077                           | 724                       | 698                      | 665                      | 438                      | 361                      | 355                      | 341                      | 313                             | 269                      | 221                      | 210                      | 184                      | 157                      | 141                     | 140                     | 134                       | 132                          | 120                                           |

|                        |    |       |      |      |     |     |     |     |     |     |     |     |     |     |     |     |     |     |     |     |     |     |
|------------------------|----|-------|------|------|-----|-----|-----|-----|-----|-----|-----|-----|-----|-----|-----|-----|-----|-----|-----|-----|-----|-----|
| Walsall                | 30 | 11134 | 1823 | 1021 | 720 | 692 | 664 | 437 | 382 | 353 | 345 | 312 | 331 | 244 | 210 | 174 | 159 | 141 | 140 | 135 | 131 | 116 |
| Oldham                 | 30 | 11147 | 1825 | 1020 | 720 | 695 | 663 | 436 | 366 | 361 | 344 | 334 | 300 | 225 | 208 | 178 | 157 | 141 | 148 | 135 | 131 | 118 |
| Waltham Forest         | 30 | 11114 | 1809 | 1026 | 717 | 736 | 664 | 436 | 348 | 356 | 376 | 315 | 294 | 208 | 212 | 174 | 159 | 141 | 128 | 138 | 131 | 116 |
| St Helens              | 30 | 11080 | 1826 | 1026 | 721 | 689 | 664 | 437 | 389 | 356 | 343 | 291 | 305 | 214 | 209 | 178 | 159 | 141 | 141 | 135 | 131 | 108 |
| Sunderland             | 30 | 11176 | 1828 | 1087 | 723 | 675 | 666 | 437 | 365 | 355 | 356 | 306 | 269 | 225 | 211 | 184 | 159 | 141 | 147 | 135 | 131 | 117 |
| Barnsley               | 30 | 11097 | 1824 | 1023 | 719 | 697 | 663 | 436 | 340 | 357 | 347 | 427 | 246 | 226 | 208 | 176 | 158 | 141 | 139 | 136 | 131 | 117 |
| Southwark              | 29 | 11347 | 1807 | 1071 | 717 | 608 | 662 | 436 | 368 | 347 | 386 | 346 | 275 | 230 | 219 | 174 | 219 | 141 | 137 | 121 | 131 | 123 |
| Tameside               | 29 | 11198 | 1825 | 1023 | 722 | 691 | 664 | 437 | 411 | 357 | 352 | 311 | 343 | 217 | 209 | 178 | 158 | 141 | 146 | 134 | 131 | 122 |
| Doncaster              | 29 | 11039 | 1822 | 1024 | 717 | 690 | 662 | 435 | 346 | 362 | 347 | 375 | 244 | 221 | 209 | 177 | 160 | 142 | 138 | 136 | 131 | 123 |
| Lambeth                | 29 | 11409 | 1805 | 1062 | 715 | 630 | 661 | 435 | 377 | 349 | 384 | 334 | 304 | 233 | 217 | 174 | 180 | 141 | 135 | 134 | 131 | 131 |
| Torbay                 | 29 | 11009 | 1824 | 1020 | 724 | 695 | 665 | 438 | 369 | 359 | 333 | 313 | 209 | 219 | 210 | 174 | 159 | 141 | 136 | 136 | 132 | 122 |
| Lewisham               | 29 | 11086 | 1814 | 1040 | 722 | 681 | 666 | 438 | 335 | 355 | 377 | 365 | 275 | 217 | 221 | 175 | 159 | 141 | 130 | 122 | 131 | 107 |
| Redcar and Cleveland   | 29 | 11040 | 1830 | 1024 | 725 | 698 | 666 | 438 | 368 | 357 | 341 | 319 | 229 | 227 | 210 | 184 | 157 | 141 | 142 | 135 | 131 | 122 |
| Bolton                 | 28 | 11111 | 1825 | 1023 | 720 | 689 | 663 | 436 | 379 | 356 | 344 | 328 | 306 | 223 | 208 | 178 | 158 | 141 | 149 | 135 | 131 | 119 |
| Rotherham              | 28 | 11006 | 1826 | 1025 | 721 | 690 | 664 | 437 | 361 | 359 | 344 | 326 | 231 | 219 | 210 | 176 | 159 | 141 | 141 | 136 | 131 | 101 |
| Newcastle upon Tyne    | 28 | 11134 | 1818 | 1047 | 712 | 648 | 661 | 433 | 375 | 355 | 344 | 305 | 289 | 209 | 209 | 184 | 161 | 142 | 145 | 137 | 131 | 144 |
| Coventry               | 28 | 11097 | 1818 | 1037 | 714 | 662 | 661 | 434 | 374 | 352 | 354 | 316 | 328 | 250 | 209 | 174 | 161 | 142 | 144 | 137 | 131 | 108 |
| Derby                  | 28 | 11025 | 1827 | 1040 | 718 | 652 | 664 | 435 | 385 | 356 | 345 | 304 | 248 | 226 | 210 | 177 | 162 | 141 | 146 | 136 | 131 | 142 |
| Westminster            | 28 | 11145 | 1798 | 1081 | 705 | 582 | 657 | 430 | 386 | 345 | 389 | 323 | 311 | 224 | 208 | 173 | 176 | 143 | 150 | 139 | 131 | 140 |
| Peterborough           | 28 | 11038 | 1815 | 1030 | 715 | 654 | 662 | 435 | 361 | 356 | 342 | 304 | 259 | 240 | 208 | 177 | 162 | 142 | 143 | 137 | 131 | 128 |
| Luton                  | 28 | 11075 | 1813 | 1030 | 714 | 665 | 662 | 434 | 372 | 354 | 345 | 299 | 276 | 239 | 209 | 177 | 161 | 142 | 139 | 137 | 131 | 143 |
| Sheffield              | 28 | 11125 | 1822 | 1039 | 717 | 667 | 663 | 435 | 348 | 358 | 342 | 453 | 261 | 216 | 212 | 176 | 161 | 141 | 143 | 137 | 131 | 123 |
| Bristol, City of       | 27 | 11129 | 1815 | 1050 | 714 | 638 | 663 | 435 | 351 | 358 | 336 | 420 | 303 | 217 | 210 | 173 | 157 | 142 | 140 | 137 | 132 | 125 |
| Portsmouth             | 27 | 10997 | 1810 | 1039 | 711 | 659 | 661 | 433 | 360 | 357 | 339 | 312 | 234 | 227 | 208 | 175 | 162 | 142 | 143 | 138 | 131 | 137 |
| Enfield                | 27 | 11001 | 1818 | 1039 | 727 | 668 | 669 | 439 | 337 | 357 | 380 | 313 | 256 | 211 | 214 | 175 | 162 | 141 | 134 | 138 | 132 | 94  |
| Wakefield              | 27 | 11078 | 1826 | 1029 | 721 | 676 | 665 | 437 | 337 | 355 | 351 | 396 | 255 | 216 | 210 | 176 | 160 | 141 | 143 | 135 | 131 | 126 |
| Wirral                 | 27 | 11142 | 1830 | 1024 | 726 | 698 | 666 | 439 | 363 | 355 | 342 | 318 | 306 | 218 | 210 | 178 | 157 | 140 | 141 | 135 | 131 | 121 |
| Southampton            | 27 | 10985 | 1810 | 1039 | 710 | 665 | 661 | 433 | 371 | 356 | 339 | 309 | 255 | 210 | 210 | 175 | 163 | 142 | 137 | 138 | 131 | 140 |
| Brent                  | 27 | 10952 | 1807 | 1038 | 713 | 665 | 662 | 433 | 343 | 354 | 383 | 318 | 277 | 221 | 211 | 174 | 162 | 142 | 132 | 139 | 131 | 105 |
| Plymouth               | 27 | 11042 | 1818 | 1032 | 717 | 674 | 663 | 435 | 378 | 354 | 336 | 320 | 249 | 220 | 210 | 174 | 160 | 142 | 134 | 137 | 131 | 145 |
| Leeds                  | 27 | 11085 | 1826 | 1047 | 721 | 647 | 666 | 437 | 360 | 360 | 344 | 358 | 279 | 215 | 211 | 177 | 161 | 141 | 142 | 136 | 131 | 126 |
| Gateshead              | 26 | 11156 | 1825 | 1086 | 719 | 669 | 663 | 436 | 378 | 354 | 347 | 325 | 297 | 214 | 209 | 184 | 160 | 141 | 144 | 135 | 131 | 131 |
| County Durham          | 26 | 11123 | 1826 | 1082 | 721 | 691 | 664 | 436 | 362 | 357 | 346 | 313 | 271 | 219 | 209 | 184 | 158 | 141 | 143 | 136 | 131 | 120 |
| Sefton                 | 26 | 11168 | 1829 | 1027 | 724 | 692 | 666 | 438 | 388 | 355 | 343 | 314 | 332 | 210 | 209 | 179 | 158 | 141 | 139 | 135 | 131 | 105 |
| Greenwich              | 26 | 11034 | 1808 | 1030 | 716 | 685 | 662 | 435 | 330 | 351 | 378 | 362 | 270 | 216 | 210 | 174 | 160 | 142 | 135 | 123 | 131 | 106 |
| Camden                 | 25 | 11167 | 1807 | 1079 | 715 | 590 | 661 | 435 | 372 | 348 | 388 | 323 | 380 | 227 | 209 | 174 | 149 | 142 | 144 | 135 | 131 | 135 |
| Wigan                  | 25 | 11099 | 1823 | 1024 | 719 | 697 | 664 | 436 | 370 | 361 | 342 | 319 | 314 | 220 | 210 | 178 | 158 | 141 | 144 | 136 | 131 | 117 |
| Telford and Wrekin     | 25 | 11105 | 1819 | 1032 | 717 | 666 | 662 | 436 | 371 | 356 | 339 | 374 | 307 | 224 | 210 | 174 | 162 | 141 | 150 | 137 | 131 | 130 |
| Stockton-on-Tees       | 25 | 11024 | 1828 | 1035 | 722 | 673 | 665 | 437 | 365 | 359 | 343 | 303 | 247 | 222 | 211 | 184 | 160 | 141 | 145 | 136 | 131 | 125 |
| Calderdale             | 25 | 11027 | 1826 | 1035 | 721 | 668 | 664 | 437 | 351 | 360 | 344 | 350 | 237 | 226 | 208 | 177 | 160 | 141 | 144 | 135 | 131 | 125 |
| Southend-on-Sea        | 25 | 11064 | 1818 | 1028 | 720 | 685 | 665 | 437 | 333 | 353 | 337 | 417 | 245 | 208 | 212 | 177 | 160 | 141 | 137 | 136 | 132 | 125 |
| Hammersmith and Fulham | 24 | 11102 | 1814 | 1073 | 720 | 606 | 666 | 438 | 362 | 350 | 387 | 356 | 270 | 228 | 209 | 175 | 165 | 141 | 135 | 134 | 131 | 130 |
| Kirklees               | 24 | 11001 | 1824 | 1027 | 718 | 687 | 662 | 436 | 355 | 356 | 341 | 341 | 234 | 223 | 208 | 176 | 159 | 142 | 144 | 136 | 131 | 126 |
| Cornwall               | 24 | 11054 | 1824 | 1028 | 724 | 684 | 665 | 438 | 369 | 355 | 333 | 325 | 257 | 208 | 210 | 174 | 159 | 141 | 135 | 137 | 132 | 150 |
| Croydon                | 24 | 11110 | 1816 | 1037 | 726 | 675 | 668 | 439 | 343 | 356 | 380 | 371 | 260 | 211 | 222 | 175 | 154 | 140 | 135 | 137 | 132 | 120 |
| Darlington             | 24 | 11077 | 1828 | 1037 | 725 | 662 | 666 | 438 | 364 | 360 | 347 | 325 | 233 | 224 | 210 | 184 | 160 | 141 | 147 | 134 | 132 | 129 |



|                           |    |       |      |      |     |     |     |     |     |     |     |     |     |     |     |     |     |     |     |     |     |     |
|---------------------------|----|-------|------|------|-----|-----|-----|-----|-----|-----|-----|-----|-----|-----|-----|-----|-----|-----|-----|-----|-----|-----|
| Ealing                    | 24 | 11030 | 1808 | 1046 | 716 | 658 | 663 | 435 | 337 | 359 | 381 | 341 | 281 | 215 | 211 | 174 | 162 | 142 | 130 | 138 | 131 | 111 |
| Brighton and Hove         | 23 | 11069 | 1811 | 1099 | 714 | 653 | 661 | 434 | 362 | 350 | 338 | 343 | 287 | 217 | 209 | 174 | 160 | 142 | 134 | 137 | 131 | 120 |
| Kensington and Chelsea    | 23 | 10980 | 1812 | 1072 | 718 | 608 | 665 | 436 | 365 | 353 | 382 | 320 | 292 | 207 | 213 | 175 | 166 | 142 | 131 | 138 | 131 | 128 |
| Isle of Wight             | 23 | 10882 | 1820 | 1018 | 721 | 672 | 665 | 436 | 349 | 355 | 341 | 326 | 229 | 213 | 212 | 175 | 161 | 141 | 131 | 138 | 131 | 113 |
| Dudley                    | 23 | 11051 | 1824 | 1023 | 721 | 693 | 664 | 437 | 372 | 352 | 340 | 319 | 314 | 226 | 210 | 174 | 160 | 141 | 142 | 137 | 131 | 121 |
| Slough                    | 23 | 10991 | 1815 | 1047 | 716 | 622 | 663 | 435 | 364 | 356 | 347 | 303 | 257 | 231 | 209 | 175 | 166 | 142 | 143 | 137 | 131 | 125 |
| Lancashire                | 22 | 11163 | 1823 | 1034 | 719 | 674 | 663 | 436 | 391 | 356 | 343 | 306 | 355 | 214 | 210 | 178 | 159 | 141 | 132 | 136 | 131 | 132 |
| Hounslow                  | 22 | 11047 | 1805 | 1051 | 713 | 633 | 662 | 434 | 348 | 353 | 386 | 368 | 271 | 221 | 210 | 174 | 164 | 142 | 136 | 138 | 131 | 117 |
| Medway                    | 22 | 10982 | 1817 | 1024 | 719 | 688 | 664 | 436 | 351 | 355 | 335 | 320 | 240 | 221 | 211 | 175 | 160 | 141 | 130 | 138 | 131 | 109 |
| Bournemouth               | 22 | 11004 | 1812 | 1037 | 710 | 665 | 660 | 433 | 363 | 355 | 337 | 303 | 231 | 222 | 209 | 173 | 161 | 143 | 141 | 139 | 131 | 139 |
| Bury                      | 22 | 11151 | 1827 | 1027 | 723 | 689 | 665 | 437 | 379 | 359 | 343 | 308 | 292 | 220 | 210 | 178 | 159 | 141 | 145 | 136 | 131 | 133 |
| Thurrock                  | 22 | 10969 | 1820 | 1026 | 722 | 683 | 665 | 438 | 337 | 356 | 342 | 320 | 238 | 222 | 211 | 177 | 161 | 141 | 134 | 137 | 132 | 121 |
| North Lincolnshire        | 21 | 11001 | 1823 | 1029 | 719 | 677 | 662 | 436 | 348 | 353 | 348 | 314 | 222 | 245 | 208 | 176 | 159 | 142 | 144 | 136 | 131 | 111 |
| Cumbria                   | 21 | 11143 | 1823 | 1033 | 719 | 668 | 663 | 436 | 377 | 356 | 345 | 333 | 318 | 212 | 208 | 177 | 160 | 141 | 146 | 137 | 131 | 136 |
| North Tyneside            | 21 | 11146 | 1829 | 1034 | 724 | 676 | 666 | 438 | 435 | 358 | 342 | 282 | 264 | 204 | 211 | 184 | 159 | 140 | 143 | 135 | 131 | 145 |
| Norfolk                   | 21 | 11058 | 1818 | 1033 | 719 | 669 | 664 | 436 | 355 | 356 | 337 | 317 | 301 | 216 | 209 | 177 | 161 | 141 | 137 | 138 | 132 | 138 |
| Lincolnshire              | 21 | 11017 | 1829 | 1029 | 722 | 683 | 665 | 437 | 344 | 355 | 338 | 311 | 256 | 224 | 209 | 177 | 160 | 141 | 140 | 136 | 131 | 129 |
| Northumberland            | 21 | 11096 | 1827 | 1028 | 722 | 692 | 664 | 437 | 388 | 356 | 342 | 302 | 263 | 209 | 210 | 184 | 159 | 141 | 143 | 137 | 131 | 129 |
| Redbridge                 | 20 | 11062 | 1811 | 1031 | 719 | 718 | 664 | 436 | 343 | 353 | 380 | 312 | 263 | 207 | 210 | 174 | 161 | 141 | 129 | 139 | 131 | 119 |
| Herefordshire, County of  | 20 | 11034 | 1820 | 1030 | 717 | 672 | 664 | 435 | 348 | 360 | 344 | 321 | 302 | 221 | 210 | 174 | 162 | 142 | 144 | 139 | 131 | 141 |
| Reading                   | 19 | 11120 | 1811 | 1140 | 715 | 623 | 661 | 434 | 381 | 353 | 344 | 301 | 236 | 226 | 210 | 174 | 165 | 142 | 145 | 152 | 131 | 145 |
| Warrington                | 19 | 11153 | 1822 | 1044 | 717 | 640 | 662 | 435 | 366 | 354 | 354 | 301 | 325 | 226 | 210 | 178 | 163 | 141 | 151 | 137 | 131 | 128 |
| Bedford                   | 19 | 10992 | 1819 | 1034 | 721 | 667 | 664 | 437 | 356 | 354 | 337 | 307 | 236 | 232 | 211 | 177 | 161 | 141 | 143 | 137 | 131 | 128 |
| Stockport                 | 19 | 11154 | 1825 | 1038 | 722 | 666 | 664 | 437 | 401 | 360 | 345 | 307 | 291 | 204 | 211 | 178 | 161 | 141 | 146 | 137 | 131 | 147 |
| Northamptonshire          | 19 | 11052 | 1827 | 1033 | 720 | 667 | 663 | 437 | 352 | 356 | 341 | 319 | 277 | 218 | 210 | 177 | 161 | 141 | 141 | 137 | 132 | 140 |
| Nottinghamshire           | 19 | 10997 | 1828 | 1028 | 720 | 686 | 665 | 436 | 355 | 353 | 338 | 309 | 248 | 219 | 210 | 177 | 160 | 141 | 138 | 138 | 131 | 134 |
| East Sussex               | 19 | 11109 | 1820 | 1075 | 723 | 685 | 666 | 437 | 353 | 354 | 403 | 355 | 268 | 190 | 210 | 175 | 160 | 141 | 128 | 124 | 131 | 97  |
| Kent                      | 19 | 11028 | 1819 | 1077 | 721 | 673 | 665 | 437 | 361 | 352 | 333 | 316 | 273 | 204 | 212 | 175 | 161 | 141 | 133 | 124 | 132 | 135 |
| Derbyshire                | 19 | 11020 | 1828 | 1032 | 722 | 682 | 665 | 437 | 380 | 353 | 338 | 307 | 261 | 216 | 211 | 177 | 160 | 141 | 140 | 137 | 132 | 137 |
| Suffolk                   | 18 | 10983 | 1817 | 1029 | 718 | 673 | 663 | 436 | 345 | 354 | 335 | 336 | 254 | 215 | 211 | 177 | 162 | 142 | 136 | 139 | 132 | 144 |
| Wandsworth                | 18 | 11048 | 1820 | 1069 | 729 | 636 | 670 | 441 | 355 | 354 | 382 | 320 | 254 | 218 | 214 | 175 | 163 | 140 | 133 | 134 | 132 | 110 |
| Hillingdon                | 18 | 11086 | 1808 | 1054 | 716 | 625 | 664 | 435 | 344 | 357 | 383 | 356 | 272 | 223 | 212 | 174 | 165 | 142 | 139 | 139 | 131 | 99  |
| Cheshire West and Chester | 18 | 11104 | 1827 | 1043 | 724 | 653 | 665 | 438 | 373 | 354 | 345 | 304 | 308 | 213 | 211 | 178 | 162 | 141 | 146 | 137 | 131 | 144 |
| Milton Keynes             | 18 | 11014 | 1819 | 1048 | 721 | 629 | 665 | 437 | 391 | 353 | 344 | 294 | 250 | 227 | 210 | 175 | 165 | 141 | 143 | 138 | 131 | 140 |
| Havering                  | 18 | 11050 | 1818 | 1034 | 726 | 675 | 668 | 440 | 347 | 356 | 378 | 311 | 249 | 202 | 214 | 175 | 162 | 140 | 130 | 137 | 132 | 121 |
| Swindon                   | 18 | 11016 | 1819 | 1042 | 718 | 651 | 664 | 436 | 345 | 354 | 337 | 367 | 217 | 226 | 211 | 173 | 163 | 141 | 140 | 138 | 131 | 140 |
| Barnet                    | 18 | 10943 | 1815 | 1045 | 720 | 666 | 666 | 437 | 340 | 354 | 377 | 313 | 263 | 203 | 214 | 175 | 163 | 141 | 129 | 140 | 132 | 98  |
| Somerset                  | 18 | 11006 | 1823 | 1032 | 722 | 678 | 666 | 437 | 355 | 358 | 333 | 331 | 236 | 214 | 210 | 174 | 161 | 141 | 134 | 139 | 132 | 137 |
| Worcestershire            | 18 | 11086 | 1822 | 1032 | 720 | 673 | 664 | 436 | 381 | 353 | 341 | 308 | 311 | 211 | 210 | 174 | 162 | 141 | 144 | 139 | 132 | 134 |
| Solihull                  | 17 | 11073 | 1826 | 1042 | 724 | 648 | 666 | 438 | 400 | 357 | 341 | 302 | 340 | 211 | 213 | 174 | 164 | 141 | 142 | 138 | 132 | 124 |
| Essex                     | 17 | 11006 | 1822 | 1033 | 722 | 671 | 666 | 437 | 340 | 354 | 336 | 328 | 267 | 213 | 212 | 177 | 162 | 141 | 135 | 138 | 132 | 124 |
| Devon                     | 17 | 11016 | 1823 | 1035 | 721 | 673 | 665 | 437 | 371 | 357 | 334 | 310 | 244 | 204 | 211 | 174 | 161 | 141 | 133 | 138 | 132 | 140 |
| Shropshire                | 17 | 11017 | 1819 | 1029 | 714 | 673 | 662 | 435 | 347 | 355 | 338 | 362 | 305 | 206 | 209 | 174 | 162 | 142 | 144 | 139 | 131 | 113 |
| Staffordshire             | 16 | 11043 | 1819 | 1030 | 716 | 679 | 662 | 435 | 398 | 353 | 339 | 306 | 319 | 213 | 211 | 174 | 161 | 142 | 140 | 128 | 131 | 120 |
| Bexley                    | 16 | 11053 | 1817 | 1035 | 727 | 680 | 669 | 439 | 340 | 356 | 376 | 345 | 250 | 196 | 215 | 175 | 162 | 140 | 129 | 124 | 132 | 118 |
| East Riding of Yorkshire  | 16 | 10971 | 1826 | 1028 | 720 | 681 | 664 | 436 | 349 | 357 | 341 | 312 | 213 | 214 | 209 | 177 | 161 | 141 | 143 | 139 | 131 | 128 |

|                              |    |       |      |      |     |     |     |     |     |     |     |     |     |     |     |     |     |     |     |     |     |     |
|------------------------------|----|-------|------|------|-----|-----|-----|-----|-----|-----|-----|-----|-----|-----|-----|-----|-----|-----|-----|-----|-----|-----|
| North Somerset               | 16 | 11096 | 1823 | 1032 | 723 | 674 | 666 | 437 | 340 | 356 | 335 | 419 | 239 | 212 | 212 | 174 | 161 | 141 | 139 | 138 | 132 | 111 |
| Trafford                     | 15 | 11115 | 1826 | 1047 | 721 | 640 | 664 | 437 | 391 | 355 | 349 | 315 | 296 | 212 | 210 | 178 | 163 | 141 | 148 | 137 | 131 | 131 |
| Poole                        | 15 | 10971 | 1820 | 1037 | 718 | 657 | 664 | 436 | 368 | 356 | 334 | 292 | 218 | 213 | 212 | 174 | 163 | 142 | 136 | 139 | 132 | 140 |
| Bromley                      | 15 | 11036 | 1819 | 1042 | 728 | 668 | 669 | 440 | 333 | 356 | 378 | 341 | 253 | 196 | 216 | 175 | 162 | 140 | 132 | 125 | 132 | 111 |
| Gloucestershire              | 15 | 10980 | 1822 | 1041 | 721 | 659 | 665 | 437 | 364 | 353 | 335 | 305 | 256 | 211 | 211 | 174 | 162 | 141 | 138 | 139 | 132 | 119 |
| Warwickshire                 | 15 | 11080 | 1821 | 1040 | 718 | 652 | 663 | 436 | 374 | 353 | 347 | 301 | 320 | 221 | 210 | 174 | 163 | 141 | 144 | 138 | 132 | 135 |
| Merton                       | 15 | 10965 | 1815 | 1047 | 721 | 655 | 667 | 438 | 360 | 353 | 380 | 318 | 249 | 203 | 214 | 175 | 163 | 141 | 129 | 138 | 132 | 125 |
| North Yorkshire              | 15 | 11005 | 1824 | 1033 | 717 | 666 | 663 | 435 | 348 | 360 | 340 | 319 | 234 | 211 | 209 | 177 | 162 | 142 | 146 | 139 | 131 | 133 |
| Sutton                       | 15 | 11006 | 1817 | 1040 | 726 | 669 | 668 | 439 | 341 | 353 | 377 | 325 | 264 | 190 | 214 | 175 | 162 | 141 | 131 | 138 | 132 | 124 |
| Dorset                       | 14 | 10976 | 1821 | 1029 | 719 | 677 | 664 | 436 | 356 | 355 | 333 | 323 | 226 | 199 | 210 | 174 | 161 | 141 | 132 | 140 | 131 | 147 |
| Harrow                       | 14 | 10920 | 1811 | 1035 | 717 | 677 | 664 | 435 | 339 | 358 | 378 | 307 | 250 | 199 | 214 | 174 | 163 | 142 | 125 | 141 | 132 | 104 |
| Cheshire East                | 14 | 11085 | 1826 | 1044 | 722 | 644 | 665 | 437 | 368 | 354 | 346 | 314 | 294 | 206 | 211 | 178 | 163 | 141 | 149 | 138 | 131 | 145 |
| West Sussex                  | 14 | 10989 | 1822 | 1049 | 723 | 660 | 666 | 438 | 346 | 353 | 334 | 351 | 253 | 200 | 212 | 175 | 162 | 141 | 134 | 138 | 132 | 118 |
| Wiltshire                    | 13 | 10973 | 1819 | 1031 | 717 | 673 | 664 | 435 | 341 | 356 | 333 | 381 | 230 | 208 | 210 | 174 | 162 | 142 | 134 | 140 | 131 | 130 |
| Cambridgeshire               | 13 | 10959 | 1814 | 1043 | 716 | 647 | 664 | 434 | 356 | 353 | 338 | 300 | 258 | 213 | 211 | 177 | 164 | 142 | 137 | 140 | 132 | 145 |
| Leicestershire               | 12 | 10962 | 1828 | 1037 | 720 | 666 | 665 | 436 | 363 | 360 | 338 | 299 | 243 | 208 | 212 | 177 | 163 | 141 | 139 | 139 | 132 | 136 |
| York                         | 12 | 10988 | 1825 | 1048 | 719 | 649 | 665 | 437 | 363 | 358 | 341 | 354 | 210 | 205 | 212 | 177 | 163 | 141 | 145 | 138 | 131 | 142 |
| Central Bedfordshire         | 12 | 10948 | 1819 | 1034 | 721 | 673 | 665 | 436 | 347 | 354 | 339 | 303 | 248 | 215 | 212 | 177 | 162 | 141 | 133 | 139 | 131 | 140 |
| Hertfordshire                | 12 | 10956 | 1822 | 1047 | 723 | 645 | 667 | 438 | 350 | 354 | 338 | 301 | 263 | 205 | 214 | 177 | 164 | 141 | 137 | 139 | 132 | 139 |
| Bath and North East Somerset | 12 | 10990 | 1821 | 1044 | 719 | 663 | 666 | 436 | 351 | 355 | 334 | 399 | 220 | 203 | 214 | 174 | 163 | 141 | 135 | 140 | 132 | 146 |
| Hampshire                    | 12 | 10966 | 1820 | 1041 | 722 | 654 | 666 | 437 | 359 | 353 | 355 | 305 | 258 | 203 | 213 | 175 | 164 | 141 | 135 | 139 | 132 | 135 |
| Oxfordshire                  | 12 | 10987 | 1815 | 1132 | 716 | 642 | 664 | 435 | 351 | 354 | 335 | 318 | 254 | 213 | 212 | 175 | 137 | 142 | 135 | 154 | 131 | 140 |
| South Gloucestershire        | 11 | 10934 | 1819 | 1046 | 718 | 638 | 665 | 436 | 343 | 356 | 335 | 390 | 215 | 202 | 212 | 174 | 165 | 142 | 135 | 141 | 131 | 119 |
| Kingston upon Thames         | 11 | 10944 | 1812 | 1053 | 721 | 650 | 666 | 438 | 333 | 354 | 380 | 333 | 247 | 193 | 215 | 174 | 164 | 141 | 130 | 139 | 132 | 117 |
| Bracknell Forest             | 10 | 10926 | 1818 | 1049 | 722 | 636 | 666 | 437 | 370 | 356 | 337 | 288 | 230 | 206 | 214 | 175 | 165 | 141 | 138 | 139 | 132 | 130 |
| West Berkshire               | 10 | 10929 | 1817 | 1049 | 720 | 623 | 666 | 436 | 359 | 355 | 342 | 311 | 230 | 217 | 213 | 175 | 167 | 142 | 143 | 140 | 132 | 140 |
| Richmond upon Thames         | 10 | 10988 | 1817 | 1060 | 726 | 645 | 668 | 440 | 345 | 354 | 378 | 344 | 249 | 194 | 216 | 175 | 164 | 141 | 126 | 138 | 132 | 132 |
| Buckinghamshire              | 10 | 10983 | 1821 | 1044 | 723 | 648 | 667 | 437 | 365 | 355 | 336 | 298 | 247 | 200 | 213 | 175 | 164 | 141 | 134 | 139 | 132 | 143 |
| Rutland                      | 10 | 11006 | 1814 | 1019 | 703 | 679 | 657 | 429 | 390 | 357 | 336 | 285 | 259 | 182 | 211 | 177 | 162 | 143 | 138 | 143 | 131 | 156 |
| Surrey                       | 9  | 10960 | 1819 | 1093 | 721 | 639 | 666 | 437 | 347 | 354 | 335 | 314 | 242 | 196 | 213 | 175 | 165 | 141 | 135 | 140 | 132 | 126 |
| Windsor and Maidenhead       | 9  | 10876 | 1819 | 1054 | 720 | 627 | 665 | 436 | 360 | 357 | 338 | 297 | 232 | 207 | 214 | 175 | 166 | 142 | 142 | 140 | 132 | 132 |
| Wokingham                    | 6  | 10887 | 1819 | 1051 | 722 | 637 | 668 | 437 | 367 | 354 | 336 | 291 | 228 | 202 | 217 | 175 | 166 | 141 | 136 | 141 | 132 | 133 |

Note: no estimates are statistically significantly different from England mean

**Appendix Figure 4:** Attributable risk for age-standardised all-cause years of life lost (YLLs) rate per 100,000 population for nine major risk factors, and Upper Tier Local Authority (UTLA) level Index of Multiple Deprivation (IMD) score, for 150 UTAs in England, 2016

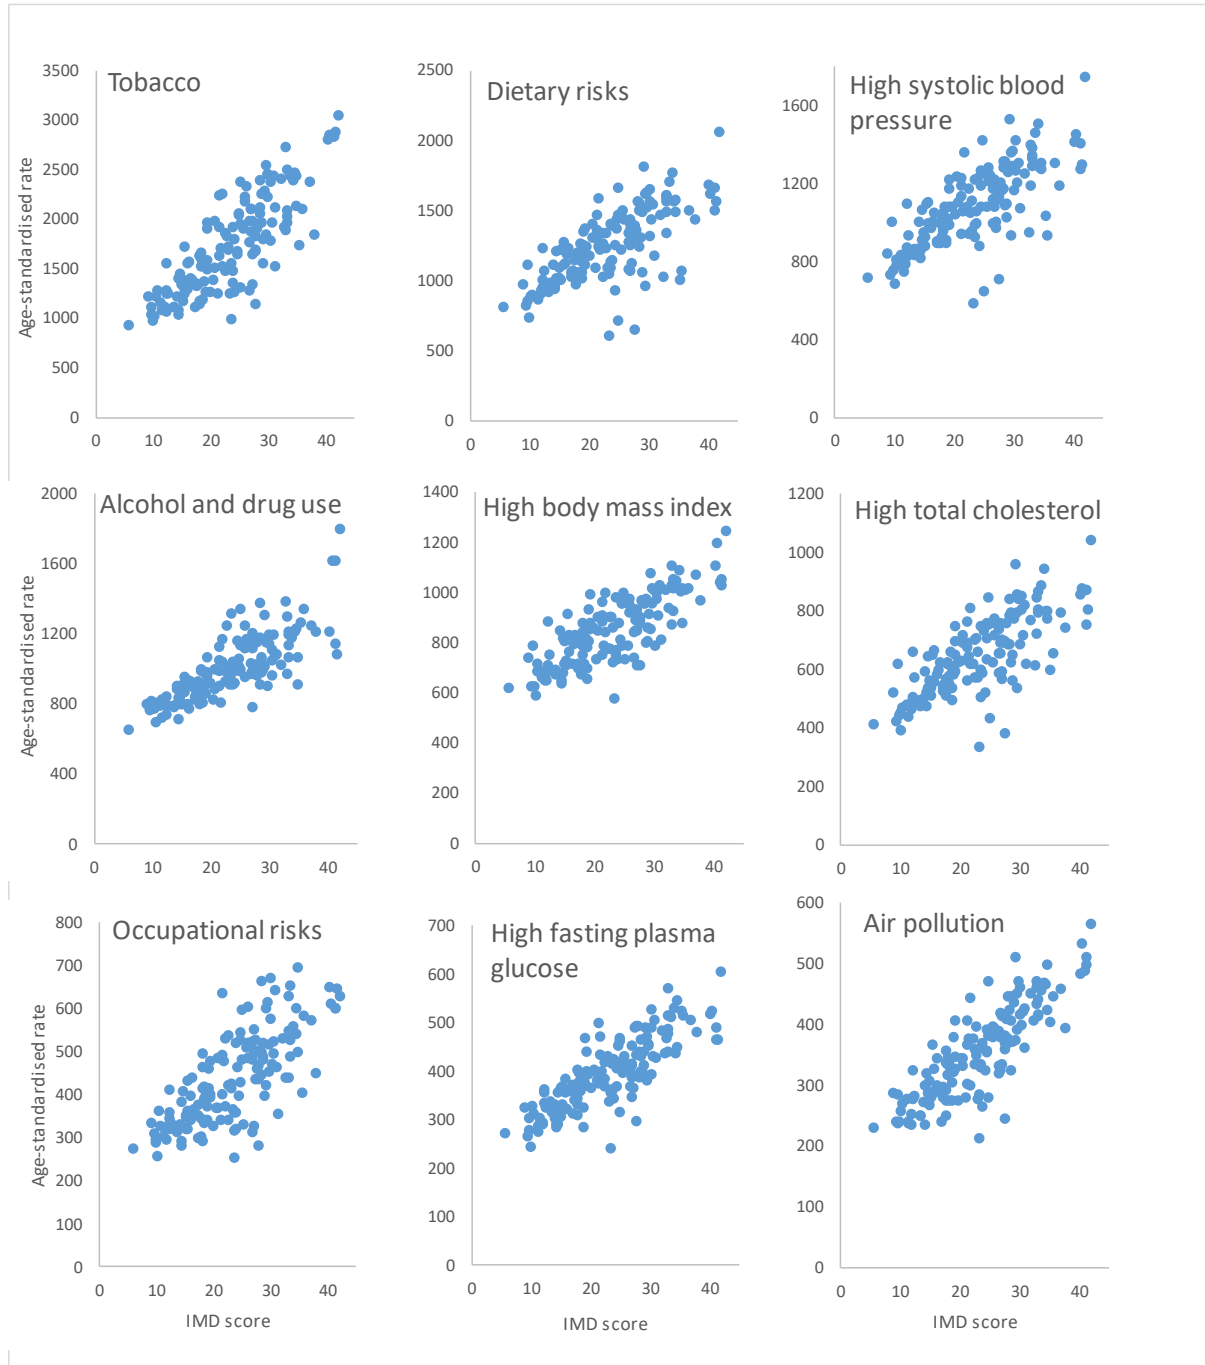

**Appendix Figure 5:** Age-standardised attributable risk for all-cause years of life lost (YLLs) rate per 100,000 population in order of decreasing Upper Tier Local Authority (UTLA) deprivation (Index of Multiple Deprivation [IMD]), England, both sexes, 2016

| Upper Tier Local Authority                | IMD score | All risk factors        | Tobacco                 | Dietary risks           | High systolic blood pressure | Alcohol and drug use  | High body-mass index  | High total cholesterol | Occupational risks   | High fasting plasma glucose | Air pollution        | Child and maternal malnutrition | Low physical activity | Impaired kidney function | Unsafe sex        | Low bone mineral density | Other environmental risks | Sexual abuse and violence | Unsafe water, sanitation, and handwashing |
|-------------------------------------------|-----------|-------------------------|-------------------------|-------------------------|------------------------------|-----------------------|-----------------------|------------------------|----------------------|-----------------------------|----------------------|---------------------------------|-----------------------|--------------------------|-------------------|--------------------------|---------------------------|---------------------------|-------------------------------------------|
| <b>England (95% uncertainty interval)</b> | <b>NA</b> | <b>4694 (4516-4869)</b> | <b>1593 (1526-1669)</b> | <b>1192 (1060-1326)</b> | <b>1032 (926-1134)</b>       | <b>967 (704-1281)</b> | <b>807 (522-1102)</b> | <b>614 (517-725)</b>   | <b>406 (359-451)</b> | <b>374 (257-514)</b>        | <b>328 (267-396)</b> | <b>296 (274-307)</b>            | <b>166 (88-253)</b>   | <b>142 (131-153)</b>     | <b>53 (52-56)</b> | <b>37 (28-39)</b>        | <b>35 (21-57)</b>         | <b>6 (6-9)</b>            | <b>5 (3-7)</b>                            |
| Blackpool                                 | 42        | 8017                    | 3061                    | 2065                    | 1746                         | 1804                  | 1246                  | 1044                   | 627                  | 605                         | 566                  | 392                             | 270                   | 221                      | 96                | 71                       | 62                        | 13                        | 8                                         |
| Knowsley                                  | 41        | 6368                    | 2891                    | 1578                    | 1297                         | 1089                  | 1030                  | 806                    | 646                  | 466                         | 499                  | 242                             | 212                   | 180                      | 72                | 51                       | 63                        | 6                         | 7                                         |
| Kingston upon Hull, City of               | 41        | 6558                    | 2840                    | 1675                    | 1410                         | 1143                  | 1051                  | 870                    | 600                  | 490                         | 510                  | 292                             | 230                   | 198                      | 67                | 45                       | 50                        | 7                         | 6                                         |
| Liverpool                                 | 41        | 6879                    | 2842                    | 1506                    | 1274                         | 1618                  | 1041                  | 753                    | 602                  | 464                         | 488                  | 370                             | 200                   | 178                      | 74                | 57                       | 60                        | 8                         | 7                                         |
| Manchester                                | 41        | 7095                    | 2867                    | 1630                    | 1456                         | 1619                  | 1196                  | 878                    | 610                  | 523                         | 533                  | 376                             | 232                   | 189                      | 78                | 65                       | 58                        | 8                         | 6                                         |
| Middlesbrough                             | 40        | 6665                    | 2811                    | 1689                    | 1414                         | 1220                  | 1104                  | 857                    | 650                  | 517                         | 483                  | 303                             | 226                   | 206                      | 91                | 45                       | 45                        | 9                         | 6                                         |
| Birmingham                                | 38        | 5805                    | 1863                    | 1442                    | 1194                         | 1217                  | 965                   | 743                    | 450                  | 479                         | 395                  | 645                             | 195                   | 163                      | 56                | 54                       | 45                        | 8                         | 6                                         |
| Nottingham                                | 37        | 6301                    | 2386                    | 1513                    | 1309                         | 1253                  | 1073                  | 792                    | 572                  | 504                         | 459                  | 477                             | 211                   | 168                      | 66                | 47                       | 84                        | 8                         | 5                                         |
| Tower Hamlets                             | 36        | 5637                    | 2121                    | 1077                    | 935                          | 1348                  | 1019                  | 656                    | 585                  | 513                         | 446                  | 332                             | 180                   | 158                      | 52                | 36                       | 19                        | 5                         | 4                                         |
| Hackney                                   | 35        | 5282                    | 1748                    | 1012                    | 1034                         | 1265                  | 1012                  | 600                    | 405                  | 524                         | 404                  | 399                             | 171                   | 167                      | 75                | 32                       | 16                        | 8                         | 4                                         |
| Barking and Dagenham                      | 35        | 5856                    | 2455                    | 1494                    | 1276                         | 917                   | 877                   | 775                    | 695                  | 448                         | 497                  | 276                             | 207                   | 168                      | 70                | 39                       | 24                        | 6                         | 7                                         |
| Sandwell                                  | 35        | 5974                    | 2147                    | 1589                    | 1311                         | 1068                  | 1015                  | 801                    | 498                  | 546                         | 424                  | 475                             | 212                   | 187                      | 64                | 48                       | 51                        | 7                         | 7                                         |
| Stoke-on-Trent                            | 34        | 6556                    | 2479                    | 1570                    | 1288                         | 1232                  | 1002                  | 800                    | 602                  | 435                         | 465                  | 602                             | 209                   | 166                      | 71                | 72                       | 58                        | 8                         | 6                                         |
| Blackburn with Darwen                     | 34        | 6470                    | 2411                    | 1782                    | 1509                         | 1213                  | 1089                  | 942                    | 542                  | 528                         | 467                  | 397                             | 250                   | 215                      | 73                | 44                       | 51                        | 6                         | 7                                         |
| Rochdale                                  | 34        | 6306                    | 2447                    | 1718                    | 1463                         | 1178                  | 1048                  | 889                    | 558                  | 512                         | 457                  | 305                             | 234                   | 217                      | 76                | 44                       | 52                        | 8                         | 6                                         |
| Wolverhampton                             | 33        | 6132                    | 2104                    | 1615                    | 1344                         | 1215                  | 1050                  | 805                    | 526                  | 570                         | 415                  | 480                             | 215                   | 202                      | 59                | 40                       | 49                        | 9                         | 7                                         |
| Hartlepool                                | 33        | 6272                    | 2513                    | 1571                    | 1331                         | 1198                  | 1013                  | 797                    | 654                  | 477                         | 441                  | 312                             | 209                   | 202                      | 83                | 38                       | 41                        | 9                         | 7                                         |
| Bradford                                  | 33        | 5704                    | 2045                    | 1502                    | 1295                         | 1068                  | 927                   | 796                    | 487                  | 440                         | 415                  | 445                             | 209                   | 174                      | 63                | 36                       | 39                        | 9                         | 6                                         |
| Leicester                                 | 33        | 5915                    | 1977                    | 1600                    | 1383                         | 1142                  | 1028                  | 867                    | 439                  | 513                         | 460                  | 455                             | 229                   | 185                      | 76                | 50                       | 70                        | 7                         | 7                                         |
| Salford                                   | 33        | 6586                    | 2740                    | 1617                    | 1400                         | 1304                  | 1109                  | 846                    | 629                  | 485                         | 471                  | 310                             | 223                   | 173                      | 67                | 52                       | 57                        | 6                         | 6                                         |
| Newham                                    | 33        | 5224                    | 1908                    | 1351                    | 1191                         | 979                   | 873                   | 723                    | 549                  | 468                         | 433                  | 286                             | 190                   | 182                      | 58                | 33                       | 20                        | 7                         | 6                                         |
| Islington                                 | 33        | 5287                    | 1927                    | 1032                    | 954                          | 1391                  | 940                   | 615                    | 439                  | 436                         | 405                  | 206                             | 166                   | 144                      | 84                | 40                       | 15                        | 10                        | 4                                         |
| Halton                                    | 32        | 5849                    | 2420                    | 1481                    | 1254                         | 1026                  | 1012                  | 768                    | 532                  | 482                         | 450                  | 267                             | 205                   | 180                      | 67                | 44                       | 51                        | 6                         | 7                                         |
| Haringey                                  | 31        | 4719                    | 1533                    | 1183                    | 1079                         | 1086                  | 810                   | 616                    | 356                  | 425                         | 361                  | 263                             | 167                   | 164                      | 61                | 32                       | 15                        | 9                         | 5                                         |
| North East Lincolnshire                   | 31        | 5711                    | 2128                    | 1547                    | 1310                         | 1083                  | 1027                  | 820                    | 462                  | 505                         | 426                  | 280                             | 215                   | 213                      | 72                | 32                       | 38                        | 8                         | 4                                         |

|                      |    |      |      |      |      |      |      |     |     |     |     |     |     |     |    |    |    |    |   |
|----------------------|----|------|------|------|------|------|------|-----|-----|-----|-----|-----|-----|-----|----|----|----|----|---|
| South Tyneside       | 31 | 5843 | 2448 | 1447 | 1208 | 1200 | 906  | 718 | 641 | 429 | 420 | 155 | 189 | 174 | 59 | 40 | 41 | 8  | 6 |
| Walsall              | 30 | 5875 | 1980 | 1576 | 1273 | 1051 | 972  | 804 | 496 | 526 | 400 | 611 | 209 | 191 | 55 | 43 | 47 | 7  | 7 |
| Oldham               | 30 | 6219 | 2390 | 1662 | 1421 | 1117 | 999  | 853 | 524 | 490 | 460 | 394 | 229 | 196 | 72 | 43 | 51 | 8  | 6 |
| Waltham Forest       | 30 | 4973 | 1796 | 1327 | 1165 | 965  | 789  | 687 | 469 | 393 | 417 | 221 | 184 | 154 | 60 | 37 | 20 | 7  | 6 |
| St Helens            | 30 | 6141 | 2460 | 1639 | 1372 | 1147 | 1008 | 839 | 575 | 451 | 470 | 250 | 221 | 191 | 76 | 52 | 52 | 6  | 8 |
| Sunderland           | 30 | 6133 | 2469 | 1532 | 1293 | 1203 | 1017 | 793 | 672 | 456 | 390 | 272 | 207 | 179 | 65 | 43 | 39 | 9  | 7 |
| Barnsley             | 30 | 5723 | 2238 | 1630 | 1364 | 910  | 956  | 857 | 515 | 470 | 450 | 257 | 226 | 171 | 70 | 32 | 43 | 6  | 6 |
| Southwark            | 29 | 5018 | 1848 | 967  | 935  | 1176 | 853  | 533 | 454 | 382 | 374 | 337 | 144 | 143 | 76 | 37 | 16 | 12 | 4 |
| Tameside             | 29 | 6418 | 2550 | 1819 | 1531 | 1154 | 1078 | 958 | 614 | 488 | 511 | 238 | 252 | 189 | 67 | 56 | 55 | 8  | 7 |
| Doncaster            | 29 | 5853 | 2305 | 1493 | 1261 | 1017 | 911  | 772 | 599 | 439 | 437 | 359 | 203 | 165 | 68 | 35 | 43 | 8  | 5 |
| Lambeth              | 29 | 5218 | 1812 | 1071 | 1026 | 1315 | 857  | 561 | 421 | 410 | 372 | 353 | 153 | 152 | 70 | 41 | 16 | 10 | 4 |
| Torbay               | 29 | 4870 | 1562 | 1312 | 1096 | 1003 | 803  | 649 | 398 | 400 | 325 | 286 | 176 | 156 | 77 | 39 | 58 | 7  | 4 |
| Lewisham             | 29 | 5231 | 1980 | 1248 | 1093 | 1054 | 799  | 622 | 481 | 399 | 445 | 335 | 172 | 143 | 68 | 30 | 19 | 5  | 5 |
| Redcar and Cleveland | 29 | 5668 | 2270 | 1566 | 1313 | 988  | 974  | 795 | 521 | 463 | 406 | 206 | 209 | 191 | 83 | 42 | 38 | 8  | 5 |
| Bolton               | 28 | 5569 | 2069 | 1511 | 1287 | 1068 | 953  | 783 | 487 | 431 | 423 | 297 | 205 | 161 | 70 | 42 | 44 | 8  | 6 |
| Rotherham            | 28 | 5615 | 2134 | 1577 | 1319 | 916  | 958  | 840 | 498 | 438 | 446 | 348 | 216 | 173 | 65 | 38 | 40 | 7  | 5 |
| Newcastle upon Tyne  | 28 | 5962 | 2410 | 1318 | 1172 | 1382 | 968  | 687 | 662 | 386 | 370 | 270 | 180 | 154 | 58 | 41 | 37 | 8  | 5 |
| Coventry             | 28 | 5507 | 1964 | 1374 | 1168 | 1182 | 968  | 686 | 448 | 493 | 377 | 334 | 183 | 166 | 65 | 40 | 46 | 8  | 6 |
| Derby                | 28 | 5437 | 1914 | 1404 | 1207 | 968  | 969  | 760 | 502 | 432 | 409 | 440 | 200 | 150 | 55 | 41 | 69 | 7  | 5 |
| Westminster          | 28 | 3822 | 1151 | 662  | 711  | 1153 | 707  | 382 | 281 | 296 | 244 | 188 | 112 | 96  | 60 | 35 | 10 | 9  | 3 |
| Peterborough         | 28 | 5063 | 1706 | 1314 | 1125 | 1022 | 902  | 695 | 467 | 494 | 382 | 246 | 189 | 171 | 52 | 40 | 25 | 8  | 6 |
| Luton                | 28 | 5179 | 1688 | 1311 | 1139 | 1026 | 874  | 690 | 437 | 489 | 369 | 392 | 188 | 175 | 74 | 44 | 26 | 7  | 5 |
| Sheffield            | 28 | 5120 | 1847 | 1328 | 1155 | 1023 | 891  | 693 | 461 | 388 | 360 | 343 | 184 | 136 | 52 | 30 | 35 | 8  | 4 |
| Bristol, City of     | 27 | 4873 | 1664 | 1133 | 1004 | 1173 | 846  | 592 | 436 | 365 | 335 | 247 | 161 | 136 | 56 | 31 | 63 | 7  | 5 |
| Portsmouth           | 27 | 5454 | 1995 | 1364 | 1188 | 1174 | 934  | 700 | 526 | 452 | 414 | 173 | 192 | 174 | 56 | 39 | 38 | 9  | 4 |
| Enfield              | 27 | 4101 | 1350 | 1075 | 977  | 787  | 711  | 567 | 327 | 346 | 324 | 268 | 156 | 130 | 48 | 26 | 14 | 5  | 4 |
| Wakefield            | 27 | 5483 | 2114 | 1443 | 1226 | 994  | 908  | 760 | 552 | 412 | 417 | 282 | 199 | 160 | 62 | 29 | 40 | 6  | 6 |
| Wirral               | 27 | 5649 | 2122 | 1416 | 1187 | 1204 | 888  | 691 | 497 | 413 | 379 | 320 | 185 | 167 | 68 | 38 | 46 | 8  | 6 |
| Southampton          | 27 | 5190 | 1891 | 1265 | 1083 | 1124 | 844  | 653 | 504 | 385 | 385 | 233 | 177 | 158 | 56 | 42 | 37 | 8  | 5 |
| Brent                | 27 | 4292 | 1292 | 1095 | 1001 | 976  | 739  | 586 | 314 | 367 | 320 | 295 | 157 | 138 | 67 | 27 | 14 | 8  | 3 |
| Plymouth             | 27 | 5085 | 1777 | 1285 | 1120 | 1036 | 838  | 655 | 482 | 401 | 332 | 263 | 176 | 157 | 58 | 43 | 66 | 7  | 4 |
| Leeds                | 27 | 5403 | 1989 | 1351 | 1175 | 1133 | 931  | 739 | 522 | 396 | 390 | 310 | 192 | 150 | 55 | 34 | 37 | 7  | 5 |
| Gateshead            | 26 | 5877 | 2338 | 1445 | 1247 | 1170 | 975  | 760 | 604 | 414 | 394 | 317 | 196 | 165 | 70 | 45 | 39 | 5  | 5 |
| County Durham        | 26 | 5708 | 2189 | 1504 | 1285 | 1120 | 949  | 774 | 519 | 430 | 379 | 279 | 202 | 173 | 58 | 41 | 36 | 8  | 5 |
| Sefton               | 26 | 5853 | 2240 | 1459 | 1214 | 1252 | 917  | 718 | 485 | 404 | 396 | 335 | 191 | 164 | 67 | 47 | 48 | 9  | 6 |
| Greenwich            | 26 | 5050 | 1923 | 1234 | 1080 | 962  | 784  | 623 | 511 | 396 | 389 | 320 | 170 | 155 | 51 | 27 | 19 | 5  | 5 |
| Camden               | 25 | 4232 | 1315 | 721  | 648  | 1344 | 732  | 431 | 330 | 315 | 279 | 208 | 120 | 112 | 68 | 34 | 11 | 6  | 3 |
| Wigan                | 25 | 6123 | 2387 | 1667 | 1423 | 1143 | 996  | 847 | 596 | 467 | 470 | 262 | 228 | 186 | 57 | 45 | 50 | 6  | 7 |
| Telford and Wrekin   | 25 | 5578 | 1962 | 1474 | 1252 | 1003 | 979  | 751 | 481 | 462 | 382 | 455 | 203 | 175 | 50 | 38 | 47 | 7  | 5 |
| Stockton-on-Tees     | 25 | 5466 | 2054 | 1379 | 1188 | 1061 | 954  | 708 | 546 | 418 | 354 | 332 | 188 | 169 | 66 | 38 | 33 | 5  | 5 |
| Calderdale           | 25 | 5553 | 2064 | 1444 | 1268 | 1014 | 954  | 760 | 528 | 451 | 392 | 315 | 204 | 182 | 66 | 35 | 38 | 6  | 5 |
| Southend-on-Sea      | 25 | 4866 | 1691 | 1257 | 1084 | 993  | 789  | 635 | 427 | 404 | 356 | 236 | 176 | 147 | 62 | 29 | 25 | 10 | 5 |

|                           |    |      |      |      |      |      |     |     |     |     |     |     |     |     |    |    |    |    |   |
|---------------------------|----|------|------|------|------|------|-----|-----|-----|-----|-----|-----|-----|-----|----|----|----|----|---|
| Hammersmith and Fulham    | 24 | 4663 | 1659 | 936  | 878  | 1167 | 814 | 522 | 396 | 368 | 325 | 255 | 141 | 140 | 68 | 36 | 13 | 7  | 4 |
| Kirklees                  | 24 | 5199 | 1807 | 1400 | 1228 | 922  | 876 | 729 | 464 | 424 | 370 | 400 | 195 | 172 | 58 | 33 | 35 | 8  | 5 |
| Cornwall                  | 24 | 4390 | 1283 | 1149 | 1001 | 920  | 730 | 589 | 318 | 341 | 266 | 361 | 159 | 139 | 54 | 37 | 48 | 9  | 3 |
| Croydon                   | 24 | 4494 | 1492 | 1146 | 1064 | 911  | 770 | 596 | 359 | 360 | 334 | 268 | 163 | 144 | 68 | 30 | 15 | 6  | 4 |
| Darlington                | 24 | 5292 | 1931 | 1408 | 1220 | 1042 | 983 | 746 | 520 | 414 | 362 | 270 | 192 | 152 | 56 | 37 | 31 | 8  | 4 |
| Ealing                    | 24 | 4310 | 1360 | 1097 | 989  | 1015 | 762 | 597 | 315 | 359 | 330 | 228 | 157 | 144 | 52 | 25 | 14 | 7  | 4 |
| Brighton and Hove         | 23 | 4887 | 1566 | 1053 | 932  | 1322 | 752 | 507 | 359 | 356 | 285 | 283 | 147 | 127 | 92 | 41 | 32 | 10 | 4 |
| Kensington and Chelsea    | 23 | 3309 | 1001 | 618  | 585  | 972  | 578 | 333 | 252 | 239 | 213 | 180 | 93  | 84  | 60 | 30 | 9  | 6  | 2 |
| Isle of Wight             | 23 | 4094 | 1264 | 1104 | 958  | 918  | 723 | 569 | 367 | 336 | 278 | 124 | 152 | 138 | 42 | 27 | 27 | 6  | 4 |
| Dudley                    | 23 | 5064 | 1697 | 1349 | 1114 | 984  | 861 | 657 | 425 | 421 | 349 | 390 | 178 | 151 | 53 | 40 | 40 | 7  | 7 |
| Slough                    | 23 | 5026 | 1737 | 1236 | 1052 | 1022 | 900 | 704 | 414 | 431 | 396 | 300 | 191 | 147 | 37 | 38 | 34 | 4  | 5 |
| Lancashire                | 22 | 5372 | 1836 | 1353 | 1173 | 1254 | 901 | 703 | 421 | 384 | 358 | 344 | 185 | 154 | 54 | 41 | 40 | 7  | 5 |
| Hounslow                  | 22 | 4440 | 1485 | 1038 | 947  | 982  | 775 | 572 | 340 | 368 | 335 | 292 | 155 | 140 | 59 | 29 | 14 | 7  | 4 |
| Medway                    | 22 | 5084 | 1870 | 1271 | 1080 | 931  | 777 | 618 | 537 | 416 | 377 | 240 | 175 | 171 | 56 | 36 | 37 | 6  | 4 |
| Bournemouth               | 22 | 4822 | 1543 | 1230 | 1070 | 1176 | 843 | 617 | 373 | 397 | 299 | 191 | 170 | 151 | 77 | 39 | 58 | 8  | 4 |
| Bury                      | 22 | 5847 | 2267 | 1594 | 1361 | 1042 | 996 | 807 | 529 | 470 | 442 | 290 | 218 | 193 | 69 | 46 | 49 | 8  | 6 |
| Thurrock                  | 22 | 4700 | 1717 | 1252 | 1062 | 814  | 785 | 641 | 477 | 433 | 375 | 198 | 175 | 153 | 56 | 31 | 25 | 6  | 5 |
| North Lincolnshire        | 21 | 5315 | 1928 | 1473 | 1234 | 910  | 965 | 761 | 493 | 497 | 406 | 292 | 202 | 205 | 68 | 33 | 36 | 6  | 5 |
| Cumbria                   | 21 | 4871 | 1636 | 1302 | 1137 | 1055 | 882 | 677 | 401 | 375 | 302 | 239 | 180 | 155 | 56 | 40 | 37 | 9  | 4 |
| North Tyneside            | 21 | 5637 | 2250 | 1372 | 1191 | 1127 | 910 | 691 | 634 | 385 | 366 | 194 | 187 | 153 | 65 | 64 | 38 | 8  | 7 |
| Norfolk                   | 21 | 4298 | 1264 | 1100 | 946  | 994  | 751 | 561 | 341 | 380 | 280 | 281 | 153 | 139 | 51 | 34 | 20 | 7  | 4 |
| Lincolnshire              | 21 | 4644 | 1527 | 1311 | 1105 | 888  | 847 | 688 | 369 | 403 | 332 | 261 | 180 | 158 | 54 | 35 | 56 | 6  | 4 |
| Northumberland            | 21 | 5297 | 1991 | 1417 | 1236 | 1000 | 900 | 714 | 486 | 398 | 345 | 237 | 195 | 158 | 48 | 53 | 34 | 6  | 5 |
| Redbridge                 | 20 | 4227 | 1392 | 1191 | 1046 | 833  | 733 | 627 | 371 | 365 | 344 | 183 | 169 | 148 | 45 | 32 | 16 | 6  | 5 |
| Herefordshire, County of  | 20 | 4396 | 1274 | 1249 | 1083 | 925  | 858 | 625 | 329 | 392 | 274 | 267 | 170 | 147 | 52 | 32 | 32 | 5  | 4 |
| Reading                   | 19 | 4847 | 1599 | 1121 | 991  | 1066 | 877 | 594 | 393 | 399 | 326 | 332 | 166 | 149 | 61 | 45 | 30 | 6  | 5 |
| Warrington                | 19 | 5358 | 1980 | 1380 | 1224 | 968  | 994 | 746 | 479 | 440 | 406 | 322 | 201 | 160 | 60 | 38 | 42 | 8  | 6 |
| Bedford                   | 19 | 4716 | 1500 | 1264 | 1082 | 929  | 850 | 647 | 401 | 468 | 348 | 277 | 182 | 167 | 47 | 37 | 22 | 6  | 5 |
| Stockport                 | 19 | 5194 | 1914 | 1357 | 1178 | 988  | 934 | 694 | 462 | 375 | 380 | 329 | 188 | 138 | 55 | 47 | 41 | 5  | 4 |
| Northamptonshire          | 19 | 4716 | 1547 | 1146 | 1019 | 977  | 805 | 583 | 404 | 369 | 322 | 348 | 160 | 143 | 50 | 35 | 57 | 7  | 6 |
| Nottinghamshire           | 19 | 4631 | 1579 | 1196 | 1019 | 863  | 783 | 602 | 415 | 381 | 325 | 319 | 165 | 145 | 47 | 40 | 60 | 6  | 5 |
| East Sussex               | 19 | 4178 | 1274 | 1027 | 898  | 980  | 653 | 496 | 340 | 283 | 274 | 249 | 139 | 114 | 58 | 31 | 27 | 7  | 4 |
| Kent                      | 19 | 4249 | 1385 | 1067 | 909  | 916  | 698 | 534 | 371 | 324 | 304 | 227 | 148 | 132 | 48 | 33 | 29 | 6  | 4 |
| Derbyshire                | 19 | 4645 | 1539 | 1269 | 1084 | 900  | 819 | 661 | 396 | 376 | 325 | 262 | 177 | 135 | 48 | 45 | 59 | 6  | 5 |
| Suffolk                   | 18 | 3968 | 1199 | 1073 | 917  | 815  | 712 | 544 | 334 | 366 | 276 | 226 | 150 | 123 | 46 | 30 | 19 | 5  | 4 |
| Wandsworth                | 18 | 4479 | 1597 | 1026 | 968  | 995  | 779 | 551 | 390 | 359 | 337 | 229 | 151 | 131 | 61 | 35 | 14 | 7  | 4 |
| Hillingdon                | 18 | 4499 | 1530 | 1049 | 956  | 992  | 809 | 578 | 417 | 376 | 333 | 240 | 157 | 134 | 47 | 27 | 14 | 5  | 4 |
| Cheshire West and Chester | 18 | 4805 | 1673 | 1205 | 1051 | 999  | 875 | 620 | 415 | 359 | 318 | 297 | 169 | 133 | 58 | 38 | 36 | 7  | 5 |
| Milton Keynes             | 18 | 4636 | 1619 | 1056 | 928  | 855  | 786 | 561 | 415 | 394 | 345 | 342 | 161 | 144 | 49 | 48 | 32 | 4  | 6 |
| Havering                  | 18 | 4434 | 1641 | 1176 | 998  | 801  | 748 | 621 | 494 | 342 | 357 | 180 | 164 | 133 | 46 | 31 | 16 | 5  | 4 |
| Swindon                   | 18 | 4684 | 1637 | 1187 | 1031 | 873  | 841 | 624 | 462 | 402 | 337 | 250 | 172 | 143 | 45 | 28 | 60 | 5  | 5 |

|                              |    |      |      |      |      |     |     |     |     |     |     |     |     |     |    |    |    |   |   |
|------------------------------|----|------|------|------|------|-----|-----|-----|-----|-----|-----|-----|-----|-----|----|----|----|---|---|
| Barnet                       | 18 | 3761 | 1183 | 983  | 895  | 809 | 672 | 522 | 291 | 309 | 275 | 194 | 142 | 120 | 40 | 26 | 12 | 4 | 3 |
| Somerset                     | 18 | 3973 | 1148 | 1034 | 894  | 839 | 690 | 511 | 304 | 332 | 249 | 289 | 144 | 125 | 47 | 34 | 43 | 6 | 4 |
| Worcestershire               | 18 | 4412 | 1351 | 1156 | 999  | 930 | 795 | 568 | 345 | 348 | 292 | 334 | 155 | 133 | 44 | 42 | 33 | 6 | 5 |
| Solihull                     | 17 | 4166 | 1338 | 1077 | 903  | 832 | 797 | 546 | 352 | 340 | 279 | 309 | 147 | 127 | 42 | 43 | 34 | 5 | 5 |
| Essex                        | 17 | 4196 | 1361 | 1066 | 908  | 842 | 716 | 537 | 376 | 369 | 298 | 270 | 149 | 129 | 47 | 29 | 21 | 6 | 4 |
| Devon                        | 17 | 3986 | 1129 | 1038 | 895  | 890 | 699 | 523 | 299 | 312 | 240 | 287 | 144 | 122 | 51 | 36 | 44 | 7 | 4 |
| Shropshire                   | 17 | 4444 | 1401 | 1242 | 1049 | 902 | 830 | 623 | 351 | 357 | 290 | 272 | 170 | 134 | 47 | 30 | 34 | 8 | 4 |
| Staffordshire                | 16 | 4614 | 1414 | 1196 | 1008 | 929 | 795 | 599 | 366 | 363 | 300 | 425 | 162 | 141 | 48 | 49 | 35 | 8 | 5 |
| Bexley                       | 16 | 4241 | 1579 | 1129 | 975  | 781 | 716 | 580 | 441 | 322 | 345 | 187 | 155 | 124 | 41 | 26 | 17 | 4 | 3 |
| East Riding of Yorkshire     | 16 | 4510 | 1571 | 1284 | 1110 | 802 | 829 | 664 | 396 | 383 | 327 | 196 | 180 | 160 | 54 | 33 | 30 | 7 | 4 |
| North Somerset               | 16 | 4311 | 1299 | 1124 | 995  | 942 | 766 | 557 | 340 | 356 | 286 | 241 | 157 | 142 | 46 | 27 | 50 | 7 | 5 |
| Trafford                     | 15 | 4756 | 1728 | 1228 | 1095 | 958 | 913 | 651 | 432 | 368 | 366 | 216 | 176 | 135 | 48 | 45 | 38 | 6 | 3 |
| Poole                        | 15 | 3995 | 1268 | 1014 | 878  | 868 | 729 | 512 | 318 | 330 | 287 | 186 | 141 | 122 | 66 | 38 | 50 | 6 | 4 |
| Bromley                      | 15 | 3905 | 1309 | 1029 | 925  | 800 | 710 | 533 | 364 | 305 | 281 | 164 | 146 | 122 | 48 | 23 | 14 | 5 | 3 |
| Gloucestershire              | 15 | 4009 | 1183 | 1025 | 887  | 906 | 712 | 529 | 318 | 325 | 267 | 223 | 148 | 122 | 47 | 38 | 46 | 6 | 4 |
| Warwickshire                 | 15 | 4372 | 1346 | 1098 | 953  | 917 | 807 | 560 | 347 | 364 | 289 | 352 | 152 | 138 | 46 | 39 | 33 | 6 | 6 |
| Merton                       | 15 | 4044 | 1404 | 1025 | 918  | 806 | 716 | 543 | 352 | 316 | 307 | 232 | 147 | 120 | 40 | 33 | 14 | 4 | 4 |
| North Yorkshire              | 15 | 4270 | 1345 | 1220 | 1067 | 844 | 819 | 645 | 325 | 356 | 288 | 246 | 172 | 144 | 46 | 30 | 26 | 6 | 3 |
| Sutton                       | 15 | 4045 | 1462 | 1024 | 909  | 805 | 678 | 533 | 407 | 290 | 320 | 184 | 145 | 115 | 36 | 27 | 15 | 4 | 4 |
| Dorset                       | 14 | 3706 | 1050 | 951  | 816  | 837 | 648 | 474 | 291 | 283 | 235 | 267 | 130 | 115 | 45 | 30 | 43 | 6 | 3 |
| Harrow                       | 14 | 3675 | 1095 | 976  | 856  | 718 | 634 | 522 | 281 | 290 | 272 | 339 | 140 | 107 | 38 | 23 | 13 | 5 | 4 |
| Cheshire East                | 14 | 4366 | 1418 | 1118 | 1005 | 910 | 850 | 592 | 384 | 331 | 299 | 267 | 160 | 132 | 48 | 35 | 30 | 7 | 4 |
| West Sussex                  | 14 | 3992 | 1227 | 994  | 864  | 893 | 681 | 498 | 330 | 303 | 272 | 239 | 140 | 118 | 45 | 29 | 26 | 7 | 4 |
| Wiltshire                    | 13 | 3811 | 1117 | 990  | 868  | 790 | 675 | 496 | 314 | 313 | 250 | 257 | 140 | 120 | 46 | 28 | 43 | 6 | 5 |
| Cambridgeshire               | 13 | 3719 | 1122 | 923  | 833  | 797 | 690 | 475 | 317 | 337 | 249 | 228 | 134 | 115 | 38 | 36 | 18 | 5 | 4 |
| Leicestershire               | 12 | 4107 | 1259 | 1080 | 935  | 798 | 751 | 569 | 334 | 325 | 283 | 335 | 152 | 123 | 47 | 36 | 49 | 5 | 5 |
| York                         | 12 | 4470 | 1561 | 1239 | 1099 | 850 | 883 | 661 | 413 | 354 | 325 | 202 | 176 | 149 | 44 | 34 | 29 | 5 | 3 |
| Central Bedfordshire         | 12 | 3874 | 1290 | 1013 | 877  | 747 | 686 | 507 | 357 | 362 | 279 | 160 | 145 | 136 | 41 | 35 | 20 | 4 | 5 |
| Hertfordshire                | 12 | 3860 | 1260 | 956  | 856  | 795 | 706 | 495 | 346 | 334 | 278 | 202 | 138 | 115 | 39 | 33 | 19 | 5 | 4 |
| Bath and North East Somerset | 12 | 3592 | 1085 | 942  | 831  | 794 | 686 | 482 | 321 | 289 | 235 | 164 | 133 | 107 | 43 | 26 | 43 | 4 | 4 |
| Hampshire                    | 12 | 3659 | 1119 | 919  | 792  | 806 | 647 | 464 | 328 | 292 | 251 | 186 | 131 | 114 | 41 | 32 | 24 | 6 | 3 |
| Oxfordshire                  | 12 | 3641 | 1107 | 872  | 747  | 828 | 648 | 437 | 296 | 303 | 241 | 226 | 126 | 108 | 38 | 30 | 23 | 5 | 4 |
| South Gloucestershire        | 11 | 3531 | 1097 | 900  | 795  | 722 | 685 | 474 | 319 | 287 | 238 | 176 | 131 | 110 | 43 | 24 | 45 | 4 | 4 |
| Kingston upon Thames         | 11 | 3608 | 1174 | 891  | 832  | 795 | 659 | 478 | 304 | 274 | 277 | 195 | 130 | 116 | 34 | 20 | 12 | 5 | 4 |
| Bracknell Forest             | 10 | 3739 | 1297 | 911  | 809  | 697 | 683 | 466 | 329 | 312 | 270 | 175 | 133 | 123 | 56 | 38 | 28 | 6 | 4 |
| West Berkshire               | 10 | 3764 | 1224 | 891  | 778  | 776 | 715 | 455 | 361 | 326 | 256 | 182 | 134 | 113 | 41 | 33 | 25 | 4 | 4 |
| Richmond upon Thames         | 10 | 3312 | 1030 | 747  | 690  | 809 | 586 | 390 | 257 | 243 | 240 | 199 | 107 | 96  | 43 | 23 | 10 | 5 | 3 |
| Buckinghamshire              | 10 | 3535 | 993  | 866  | 761  | 780 | 627 | 443 | 290 | 276 | 236 | 261 | 126 | 109 | 41 | 35 | 22 | 6 | 4 |
| Rutland                      | 10 | 4041 | 1123 | 1119 | 1004 | 817 | 787 | 618 | 295 | 301 | 285 | 333 | 160 | 190 | 17 | 39 | 42 | 7 | 5 |
| Surrey                       | 9  | 3460 | 1046 | 827  | 736  | 769 | 626 | 419 | 310 | 264 | 241 | 191 | 121 | 100 | 40 | 28 | 22 | 5 | 4 |

|                        |   |      |      |     |     |     |     |     |     |     |     |     |     |     |    |    |    |   |   |
|------------------------|---|------|------|-----|-----|-----|-----|-----|-----|-----|-----|-----|-----|-----|----|----|----|---|---|
| Windsor and Maidenhead | 9 | 3894 | 1228 | 984 | 845 | 800 | 737 | 517 | 336 | 324 | 288 | 236 | 146 | 121 | 46 | 32 | 26 | 6 | 4 |
| Wokingham              | 6 | 3256 | 939  | 816 | 717 | 654 | 617 | 413 | 274 | 272 | 230 | 247 | 119 | 102 | 28 | 32 | 21 | 3 | 4 |

 Statistically significantly lower than the England mean  
 Statistically significantly higher than the England mean



**Appendix Figure 6:** Population attributable fraction for risk factors for all-cause age-standardised years of life lost (YLLs) rate per 100,000 population per year, in order of decreasing Upper Tier Local Authority (UTLA) deprivation (Index of Multiple Deprivation [IMD]), England, both sexes, 2016

| Upper Tier Local Authority                | IMD score | All risk factors   | Tobacco            | Dietary risks      | High systolic blood pressure | Alcohol and drug use | High body-mass index | High total cholesterol | Occupational risks | High fasting plasma glucose | Air pollution    | Child and maternal malnutrition | Low physical activity | Impaired kidney function | Unsafe sex       | Low bone mineral density | Other environmental risks | Sexual abuse and violence | Unsafe water, sanitation, and handwashing |
|-------------------------------------------|-----------|--------------------|--------------------|--------------------|------------------------------|----------------------|----------------------|------------------------|--------------------|-----------------------------|------------------|---------------------------------|-----------------------|--------------------------|------------------|--------------------------|---------------------------|---------------------------|-------------------------------------------|
| <b>England (95% uncertainty interval)</b> | <b>N</b>  | <b>52.5</b>        | <b>17.8</b>        | <b>13.3</b>        | <b>11.5</b>                  | <b>10.8</b>          | <b>9.0</b>           | <b>6.9</b>             | <b>4.5</b>         | <b>4.2</b>                  | <b>3.7</b>       | <b>3.3</b>                      | <b>1.9</b>            | <b>1.6</b>               | <b>0.6</b>       | <b>0.4</b>               | <b>0.4</b>                | <b>0.1</b>                | <b>0.1</b>                                |
|                                           | <b>A</b>  | <b>(50.6-54.4)</b> | <b>(17.1-18.7)</b> | <b>(11.9-14.8)</b> | <b>(10.3-12.7)</b>           | <b>(7.9-14.3)</b>    | <b>(5.8-12.3)</b>    | <b>(5.8-8.1)</b>       | <b>(4.0-5.1)</b>   | <b>(2.9-5.7)</b>            | <b>(3.0-4.4)</b> | <b>(3.1-3.4)</b>                | <b>(1.0-2.8)</b>      | <b>(1.5-1.7)</b>         | <b>(0.6-0.6)</b> | <b>(0.3-0.4)</b>         | <b>(0.2-0.6)</b>          | <b>(0.1-0.1)</b>          | <b>(0.0-0.1)</b>                          |
| Blackpool                                 | 42        | 56.1               | 21.4               | 14.5               | 12.2                         | 12.6                 | 8.7                  | 7.3                    | 4.4                | 4.2                         | 4                | 2.8                             | 1.9                   | 1.5                      | 0.7              | 0.5                      | 0.4                       | 0.1                       | 0.1                                       |
| Knowsley                                  | 41        | 57.7               | 26.2               | 14.3               | 11.8                         | 9.9                  | 9.3                  | 7.3                    | 5.9                | 4.2                         | 4.5              | 2.2                             | 1.9                   | 1.6                      | 0.7              | 0.5                      | 0.6                       | 0.1                       | 0.1                                       |
| Kingston upon Hull, City of               | 41        | 57                 | 24.7               | 14.6               | 12.3                         | 9.9                  | 9.1                  | 7.6                    | 5.2                | 4.3                         | 4.4              | 2.5                             | 2                     | 1.7                      | 0.6              | 0.4                      | 0.4                       | 0.1                       | 0                                         |
| Liverpool                                 | 41        | 59.2               | 24.5               | 13                 | 11                           | 13.9                 | 9                    | 6.5                    | 5.2                | 4                           | 4.2              | 3.2                             | 1.7                   | 1.5                      | 0.6              | 0.5                      | 0.5                       | 0.1                       | 0.1                                       |
| Manchester                                | 41        | 60.5               | 24.4               | 13.9               | 12.4                         | 13.8                 | 10.2                 | 7.5                    | 5.2                | 4.5                         | 4.5              | 3.2                             | 2                     | 1.6                      | 0.7              | 0.6                      | 0.5                       | 0.1                       | 0                                         |
| Middlesbrough                             | 40        | 57                 | 24                 | 14.4               | 12.1                         | 10.4                 | 9.4                  | 7.3                    | 5.6                | 4.4                         | 4.1              | 2.6                             | 1.9                   | 1.8                      | 0.8              | 0.4                      | 0.4                       | 0.1                       | 0.1                                       |
| Birmingham                                | 38        | 56                 | 18                 | 13.9               | 11.5                         | 11.7                 | 9.3                  | 7.2                    | 4.3                | 4.6                         | 3.8              | 6.2                             | 1.9                   | 1.6                      | 0.5              | 0.5                      | 0.4                       | 0.1                       | 0.1                                       |
| Nottingham                                | 37        | 55.7               | 21.1               | 13.4               | 11.6                         | 11.1                 | 9.5                  | 7                      | 5.1                | 4.5                         | 4.1              | 4.2                             | 1.9                   | 1.5                      | 0.6              | 0.4                      | 0.7                       | 0.1                       | 0                                         |
| Tower Hamlets                             | 36        | 58.5               | 22                 | 11.2               | 9.7                          | 14                   | 10.6                 | 6.8                    | 6.1                | 5.3                         | 4.6              | 3.5                             | 1.9                   | 1.6                      | 0.5              | 0.4                      | 0.2                       | 0.1                       | 0                                         |
| Hackney                                   | 35        | 56.2               | 18.6               | 10.8               | 11                           | 13.5                 | 10.8                 | 6.4                    | 4.3                | 5.6                         | 4.3              | 4.3                             | 1.8                   | 1.8                      | 0.8              | 0.3                      | 0.2                       | 0.1                       | 0                                         |
| Barking and Dagenham                      | 35        | 55.1               | 23.1               | 14.1               | 12                           | 8.6                  | 8.2                  | 7.3                    | 6.5                | 4.2                         | 4.7              | 2.6                             | 1.9                   | 1.6                      | 0.7              | 0.4                      | 0.2                       | 0.1                       | 0.1                                       |
| Sandwell                                  | 35        | 54.9               | 19.7               | 14.6               | 12.1                         | 9.8                  | 9.3                  | 7.4                    | 4.6                | 5                           | 3.9              | 4.4                             | 2                     | 1.7                      | 0.6              | 0.4                      | 0.5                       | 0.1                       | 0.1                                       |
| Stoke-on-Trent                            | 34        | 55.3               | 20.9               | 13.2               | 10.9                         | 10.4                 | 8.5                  | 6.8                    | 5.1                | 3.7                         | 3.9              | 5.1                             | 1.8                   | 1.4                      | 0.6              | 0.6                      | 0.5                       | 0.1                       | 0.1                                       |
| Blackburn with Darwen                     | 34        | 56.4               | 21                 | 15.5               | 13.2                         | 10.6                 | 9.5                  | 8.2                    | 4.7                | 4.6                         | 4.1              | 3.5                             | 2.2                   | 1.9                      | 0.6              | 0.4                      | 0.4                       | 0.1                       | 0.1                                       |
| Rochdale                                  | 34        | 56.5               | 21.9               | 15.4               | 13.1                         | 10.6                 | 9.4                  | 8                      | 5                  | 4.6                         | 4.1              | 2.7                             | 2.1                   | 1.9                      | 0.7              | 0.4                      | 0.5                       | 0.1                       | 0.1                                       |
| Wolverhampton                             | 33        | 55.2               | 18.9               | 14.5               | 12.1                         | 10.9                 | 9.5                  | 7.2                    | 4.7                | 5.1                         | 3.7              | 4.3                             | 1.9                   | 1.8                      | 0.5              | 0.4                      | 0.4                       | 0.1                       | 0.1                                       |
| Hartlepool                                | 33        | 57.2               | 22.9               | 14.3               | 12.1                         | 10.9                 | 9.2                  | 7.3                    | 6                  | 4.4                         | 4                | 2.9                             | 1.9                   | 1.8                      | 0.8              | 0.3                      | 0.4                       | 0.1                       | 0.1                                       |
| Bradford                                  | 33        | 54.9               | 19.7               | 14.5               | 12.5                         | 10.3                 | 8.9                  | 7.7                    | 4.7                | 4.2                         | 4                | 4.3                             | 2                     | 1.7                      | 0.6              | 0.3                      | 0.4                       | 0.1                       | 0.1                                       |
| Leicester                                 | 33        | 55.3               | 18.5               | 15                 | 12.9                         | 10.7                 | 9.6                  | 8.1                    | 4.1                | 4.8                         | 4.3              | 4.3                             | 2.1                   | 1.7                      | 0.7              | 0.5                      | 0.7                       | 0.1                       | 0.1                                       |
| Salford                                   | 33        | 57.2               | 23.8               | 14.1               | 12.2                         | 11.3                 | 9.6                  | 7.4                    | 5.5                | 4.2                         | 4.1              | 2.7                             | 1.9                   | 1.5                      | 0.6              | 0.5                      | 0.5                       | 0.1                       | 0.1                                       |
| Newham                                    | 33        | 55.5               | 20.3               | 14.4               | 12.7                         | 10.4                 | 9.3                  | 7.7                    | 5.8                | 5                           | 4.6              | 3                               | 2                     | 1.9                      | 0.6              | 0.4                      | 0.2                       | 0.1                       | 0.1                                       |
| Islington                                 | 33        | 56.3               | 20.5               | 11                 | 10.2                         | 14.8                 | 10                   | 6.5                    | 4.7                | 4.6                         | 4.3              | 2.2                             | 1.8                   | 1.5                      | 0.9              | 0.4                      | 0.2                       | 0.1                       | 0                                         |
| Halton                                    | 32        | 55.2               | 22.8               | 14                 | 11.8                         | 9.7                  | 9.5                  | 7.2                    | 5                  | 4.5                         | 4.2              | 2.5                             | 1.9                   | 1.7                      | 0.6              | 0.4                      | 0.5                       | 0.1                       | 0.1                                       |
| Haringey                                  | 31        | 53.1               | 17.2               | 13.3               | 12.1                         | 12.2                 | 9.1                  | 6.9                    | 4                  | 4.8                         | 4.1              | 3                               | 1.9                   | 1.8                      | 0.7              | 0.4                      | 0.2                       | 0.1                       | 0.1                                       |

|                      |    |      |      |      |      |      |     |     |     |     |     |     |     |     |     |     |     |     |     |
|----------------------|----|------|------|------|------|------|-----|-----|-----|-----|-----|-----|-----|-----|-----|-----|-----|-----|-----|
| North East           |    |      |      |      |      |      |     |     |     |     |     |     |     |     |     |     |     |     |     |
| Lincolnshire         | 31 | 54.3 | 20.2 | 14.7 | 12.4 | 10.3 | 9.8 | 7.8 | 4.4 | 4.8 | 4.1 | 2.7 | 2   | 2   | 0.7 | 0.3 | 0.4 | 0.1 | 0   |
| South Tyneside       | 31 | 57.1 | 23.9 | 14.2 | 11.8 | 11.7 | 8.9 | 7   | 6.3 | 4.2 | 4.1 | 1.5 | 1.9 | 1.7 | 0.6 | 0.4 | 0.4 | 0.1 | 0.1 |
| Walsall              | 30 | 54.7 | 18.4 | 14.7 | 11.8 | 9.8  | 9   | 7.5 | 4.6 | 4.9 | 3.7 | 5.7 | 1.9 | 1.8 | 0.5 | 0.4 | 0.4 | 0.1 | 0.1 |
| Oldham               | 30 | 55.9 | 21.5 | 14.9 | 12.8 | 10   | 9   | 7.7 | 4.7 | 4.4 | 4.1 | 3.5 | 2.1 | 1.8 | 0.6 | 0.4 | 0.5 | 0.1 | 0.1 |
| Waltham Forest       | 30 | 53.3 | 19.2 | 14.2 | 12.5 | 10.3 | 8.5 | 7.4 | 5   | 4.2 | 4.5 | 2.4 | 2   | 1.6 | 0.6 | 0.4 | 0.2 | 0.1 | 0.1 |
| St Helens            | 30 | 55.5 | 22.2 | 14.8 | 12.4 | 10.4 | 9.1 | 7.6 | 5.2 | 4.1 | 4.3 | 2.3 | 2   | 1.7 | 0.7 | 0.5 | 0.5 | 0.1 | 0.1 |
| Sunderland           | 30 | 56.4 | 22.7 | 14.1 | 11.9 | 11.1 | 9.4 | 7.3 | 6.2 | 4.2 | 3.6 | 2.5 | 1.9 | 1.7 | 0.6 | 0.4 | 0.4 | 0.1 | 0.1 |
| Barnsley             | 30 | 54.2 | 21.2 | 15.4 | 12.9 | 8.6  | 9   | 8.1 | 4.9 | 4.5 | 4.3 | 2.4 | 2.1 | 1.6 | 0.7 | 0.3 | 0.4 | 0.1 | 0.1 |
| Southwark            | 29 | 55.5 | 20.4 | 10.7 | 10.3 | 13   | 9.4 | 5.9 | 5   | 4.2 | 4.1 | 3.7 | 1.6 | 1.6 | 0.8 | 0.4 | 0.2 | 0.1 | 0   |
| Tameside             | 29 | 57.5 | 22.8 | 16.3 | 13.7 | 10.3 | 9.7 | 8.6 | 5.5 | 4.4 | 4.6 | 2.1 | 2.3 | 1.7 | 0.6 | 0.5 | 0.5 | 0.1 | 0.1 |
| Doncaster            | 29 | 54   | 21.3 | 13.8 | 11.6 | 9.4  | 8.4 | 7.1 | 5.5 | 4   | 4   | 3.3 | 1.9 | 1.5 | 0.6 | 0.3 | 0.4 | 0.1 | 0.1 |
| Lambeth              | 29 | 55.1 | 19.1 | 11.3 | 10.8 | 13.9 | 9.1 | 5.9 | 4.4 | 4.3 | 3.9 | 3.7 | 1.6 | 1.6 | 0.7 | 0.4 | 0.2 | 0.1 | 0   |
| Torbay               | 29 | 49.5 | 15.9 | 13.3 | 11.2 | 10.2 | 8.2 | 6.6 | 4   | 4.1 | 3.3 | 2.9 | 1.8 | 1.6 | 0.8 | 0.4 | 0.6 | 0.1 | 0   |
| Lewisham             | 29 | 55.1 | 20.8 | 13.1 | 11.5 | 11.1 | 8.4 | 6.6 | 5.1 | 4.2 | 4.7 | 3.5 | 1.8 | 1.5 | 0.7 | 0.3 | 0.2 | 0.1 | 0.1 |
| Redcar and Cleveland | 29 | 55   | 22   | 15.2 | 12.7 | 9.6  | 9.5 | 7.7 | 5.1 | 4.5 | 3.9 | 2   | 2   | 1.9 | 0.8 | 0.4 | 0.4 | 0.1 | 0   |
| Bolton               | 28 | 54.4 | 20.2 | 14.8 | 12.6 | 10.4 | 9.3 | 7.7 | 4.8 | 4.2 | 4.1 | 2.9 | 2   | 1.6 | 0.7 | 0.4 | 0.4 | 0.1 | 0.1 |
| Rotherham            | 28 | 53.8 | 20.4 | 15.1 | 12.6 | 8.8  | 9.2 | 8   | 4.8 | 4.2 | 4.3 | 3.3 | 2.1 | 1.7 | 0.6 | 0.4 | 0.4 | 0.1 | 0   |
| Newcastle upon Tyne  | 28 | 57.1 | 23.1 | 12.6 | 11.2 | 13.2 | 9.3 | 6.6 | 6.3 | 3.7 | 3.5 | 2.6 | 1.7 | 1.5 | 0.6 | 0.4 | 0.4 | 0.1 | 0   |
| Coventry             | 28 | 54.5 | 19.4 | 13.6 | 11.5 | 11.7 | 9.6 | 6.8 | 4.4 | 4.9 | 3.7 | 3.3 | 1.8 | 1.6 | 0.6 | 0.4 | 0.5 | 0.1 | 0.1 |
| Derby                | 28 | 53.5 | 18.8 | 13.8 | 11.9 | 9.5  | 9.5 | 7.5 | 4.9 | 4.3 | 4   | 4.3 | 2   | 1.5 | 0.5 | 0.4 | 0.7 | 0.1 | 0.1 |
| Westminster          | 28 | 52.7 | 15.9 | 9.1  | 9.8  | 15.9 | 9.7 | 5.3 | 3.9 | 4.1 | 3.4 | 2.6 | 1.5 | 1.3 | 0.8 | 0.5 | 0.1 | 0.1 | 0   |
| Peterborough         | 28 | 51.8 | 17.5 | 13.5 | 11.5 | 10.5 | 9.2 | 7.1 | 4.8 | 5.1 | 3.9 | 2.5 | 1.9 | 1.8 | 0.5 | 0.4 | 0.3 | 0.1 | 0.1 |
| Luton                | 28 | 53.1 | 17.3 | 13.4 | 11.7 | 10.5 | 9   | 7.1 | 4.5 | 5   | 3.8 | 4   | 1.9 | 1.8 | 0.8 | 0.4 | 0.3 | 0.1 | 0.1 |
| Sheffield            | 28 | 54   | 19.5 | 14   | 12.2 | 10.8 | 9.4 | 7.3 | 4.9 | 4.1 | 3.8 | 3.6 | 1.9 | 1.4 | 0.5 | 0.3 | 0.4 | 0.1 | 0   |
| Bristol, City of     | 27 | 53.6 | 18.3 | 12.5 | 11.1 | 12.9 | 9.3 | 6.5 | 4.8 | 4   | 3.7 | 2.7 | 1.8 | 1.5 | 0.6 | 0.3 | 0.7 | 0.1 | 0.1 |
| Portsmouth           | 27 | 54.5 | 19.9 | 13.6 | 11.9 | 11.7 | 9.3 | 7   | 5.3 | 4.5 | 4.1 | 1.7 | 1.9 | 1.7 | 0.6 | 0.4 | 0.4 | 0.1 | 0   |
| Enfield              | 27 | 51.1 | 16.8 | 13.4 | 12.2 | 9.8  | 8.9 | 7.1 | 4.1 | 4.3 | 4   | 3.3 | 1.9 | 1.6 | 0.6 | 0.3 | 0.2 | 0.1 | 0.1 |
| Wakefield            | 27 | 54.8 | 21.1 | 14.4 | 12.3 | 9.9  | 9.1 | 7.6 | 5.5 | 4.1 | 4.2 | 2.8 | 2   | 1.6 | 0.6 | 0.3 | 0.4 | 0.1 | 0.1 |
| Wirral               | 27 | 54.1 | 20.3 | 13.6 | 11.4 | 11.5 | 8.5 | 6.6 | 4.8 | 4   | 3.6 | 3.1 | 1.8 | 1.6 | 0.7 | 0.4 | 0.4 | 0.1 | 0.1 |
| Southampton          | 27 | 54.2 | 19.7 | 13.2 | 11.3 | 11.8 | 8.8 | 6.8 | 5.3 | 4   | 4   | 2.4 | 1.8 | 1.7 | 0.6 | 0.4 | 0.4 | 0.1 | 0   |
| Brent                | 27 | 52.9 | 15.9 | 13.5 | 12.3 | 12   | 9.1 | 7.2 | 3.9 | 4.5 | 3.9 | 3.7 | 1.9 | 1.7 | 0.8 | 0.3 | 0.2 | 0.1 | 0   |
| Plymouth             | 27 | 52.3 | 18.3 | 13.2 | 11.5 | 10.6 | 8.6 | 6.7 | 5   | 4.1 | 3.4 | 2.7 | 1.8 | 1.6 | 0.6 | 0.4 | 0.7 | 0.1 | 0   |
| Leeds                | 27 | 56   | 20.6 | 14   | 12.2 | 11.7 | 9.7 | 7.7 | 5.4 | 4.1 | 4   | 3.2 | 2   | 1.6 | 0.6 | 0.4 | 0.4 | 0.1 | 0   |
| Gateshead            | 26 | 56.5 | 22.4 | 13.9 | 12   | 11.2 | 9.4 | 7.3 | 5.8 | 4   | 3.8 | 3.1 | 1.9 | 1.6 | 0.7 | 0.4 | 0.4 | 0.1 | 0.1 |
| County Durham        | 26 | 55.3 | 21.2 | 14.6 | 12.4 | 10.9 | 9.2 | 7.5 | 5   | 4.2 | 3.7 | 2.7 | 2   | 1.7 | 0.6 | 0.4 | 0.3 | 0.1 | 0.1 |
| Sefton               | 26 | 54.8 | 21   | 13.7 | 11.4 | 11.7 | 8.6 | 6.7 | 4.5 | 3.8 | 3.7 | 3.1 | 1.8 | 1.5 | 0.6 | 0.4 | 0.5 | 0.1 | 0.1 |
| Greenwich            | 26 | 54.8 | 20.9 | 13.4 | 11.7 | 10.4 | 8.5 | 6.8 | 5.5 | 4.3 | 4.2 | 3.5 | 1.8 | 1.7 | 0.6 | 0.3 | 0.2 | 0.1 | 0.1 |
| Camden               | 25 | 54.1 | 16.8 | 9.2  | 8.3  | 17.2 | 9.4 | 5.5 | 4.2 | 4   | 3.6 | 2.7 | 1.5 | 1.4 | 0.9 | 0.4 | 0.1 | 0.1 | 0   |
| Wigan                | 25 | 56.2 | 21.9 | 15.3 | 13.1 | 10.5 | 9.1 | 7.8 | 5.5 | 4.3 | 4.3 | 2.4 | 2.1 | 1.7 | 0.5 | 0.4 | 0.5 | 0.1 | 0.1 |
| Telford and Wrekin   | 25 | 53.4 | 18.8 | 14.1 | 12   | 9.6  | 9.4 | 7.2 | 4.6 | 4.4 | 3.7 | 4.4 | 1.9 | 1.7 | 0.5 | 0.4 | 0.4 | 0.1 | 0   |
| Stockton-on-Tees     | 25 | 55.3 | 20.8 | 13.9 | 12   | 10.7 | 9.6 | 7.2 | 5.5 | 4.2 | 3.6 | 3.4 | 1.9 | 1.7 | 0.7 | 0.4 | 0.3 | 0   | 0.1 |
| Calderdale           | 25 | 53.7 | 20   | 14   | 12.3 | 9.8  | 9.2 | 7.3 | 5.1 | 4.4 | 3.8 | 3.1 | 2   | 1.8 | 0.6 | 0.3 | 0.4 | 0.1 | 0.1 |

|                           |    |      |      |      |      |      |      |     |     |     |     |     |     |     |     |     |     |     |     |
|---------------------------|----|------|------|------|------|------|------|-----|-----|-----|-----|-----|-----|-----|-----|-----|-----|-----|-----|
| Southend-on-Sea           | 25 | 51.1 | 17.7 | 13.2 | 11.4 | 10.4 | 8.3  | 6.7 | 4.5 | 4.2 | 3.7 | 2.5 | 1.8 | 1.5 | 0.7 | 0.3 | 0.3 | 0.1 | 0.1 |
| Hammersmith and Fulham    | 24 | 54.2 | 19.3 | 10.9 | 10.2 | 13.6 | 9.5  | 6.1 | 4.6 | 4.3 | 3.8 | 3   | 1.6 | 1.6 | 0.8 | 0.4 | 0.2 | 0.1 | 0   |
| Kirklees                  | 24 | 53.6 | 18.6 | 14.4 | 12.7 | 9.5  | 9    | 7.5 | 4.8 | 4.4 | 3.8 | 4.1 | 2   | 1.8 | 0.6 | 0.3 | 0.4 | 0.1 | 0.1 |
| Cornwall                  | 24 | 49.9 | 14.6 | 13.1 | 11.4 | 10.5 | 8.3  | 6.7 | 3.6 | 3.9 | 3   | 4.1 | 1.8 | 1.6 | 0.6 | 0.4 | 0.5 | 0.1 | 0   |
| Croydon                   | 24 | 52.1 | 17.3 | 13.3 | 12.3 | 10.6 | 8.9  | 6.9 | 4.2 | 4.2 | 3.9 | 3.1 | 1.9 | 1.7 | 0.8 | 0.3 | 0.2 | 0.1 | 0   |
| Darlington                | 24 | 53.1 | 19.4 | 14.1 | 12.3 | 10.5 | 9.9  | 7.5 | 5.2 | 4.2 | 3.6 | 2.7 | 1.9 | 1.5 | 0.6 | 0.4 | 0.3 | 0.1 | 0   |
| Ealing                    | 24 | 52.7 | 16.6 | 13.4 | 12.1 | 12.4 | 9.3  | 7.3 | 3.9 | 4.4 | 4   | 2.8 | 1.9 | 1.8 | 0.6 | 0.3 | 0.2 | 0.1 | 0.1 |
| Brighton and Hove         | 23 | 52.1 | 16.7 | 11.2 | 9.9  | 14.1 | 8    | 5.4 | 3.8 | 3.8 | 3   | 3   | 1.6 | 1.4 | 1   | 0.4 | 0.3 | 0.1 | 0   |
| Kensington and Chelsea    | 23 | 50.3 | 15.2 | 9.4  | 8.9  | 14.8 | 8.8  | 5.1 | 3.8 | 3.6 | 3.2 | 2.7 | 1.4 | 1.3 | 0.9 | 0.5 | 0.1 | 0.1 | 0   |
| Isle of Wight             | 23 | 49.1 | 15.1 | 13.2 | 11.5 | 11   | 8.7  | 6.8 | 4.4 | 4   | 3.3 | 1.5 | 1.8 | 1.7 | 0.5 | 0.3 | 0.3 | 0.1 | 0   |
| Dudley                    | 23 | 51.9 | 17.4 | 13.8 | 11.4 | 10.1 | 8.8  | 6.7 | 4.4 | 4.3 | 3.6 | 4   | 1.8 | 1.5 | 0.5 | 0.4 | 0.4 | 0.1 | 0.1 |
| Slough                    | 23 | 52.7 | 18.2 | 13   | 11   | 10.7 | 9.4  | 7.4 | 4.3 | 4.5 | 4.2 | 3.2 | 2   | 1.5 | 0.4 | 0.4 | 0.4 | 0   | 0.1 |
| Lancashire                | 22 | 55   | 18.8 | 13.8 | 12   | 12.8 | 9.2  | 7.2 | 4.3 | 3.9 | 3.7 | 3.5 | 1.9 | 1.6 | 0.5 | 0.4 | 0.4 | 0.1 | 0   |
| Hounslow                  | 22 | 52.7 | 17.6 | 12.3 | 11.2 | 11.7 | 9.2  | 6.8 | 4   | 4.4 | 4   | 3.5 | 1.8 | 1.7 | 0.7 | 0.3 | 0.2 | 0.1 | 0.1 |
| Medway                    | 22 | 52.9 | 19.5 | 13.2 | 11.3 | 9.7  | 8.1  | 6.4 | 5.6 | 4.3 | 3.9 | 2.5 | 1.8 | 1.8 | 0.6 | 0.4 | 0.4 | 0.1 | 0   |
| Bournemouth               | 22 | 52   | 16.6 | 13.3 | 11.6 | 12.7 | 9.1  | 6.7 | 4   | 4.3 | 3.2 | 2.1 | 1.8 | 1.6 | 0.8 | 0.4 | 0.6 | 0.1 | 0   |
| Bury                      | 22 | 55.1 | 21.3 | 15   | 12.8 | 9.8  | 9.4  | 7.6 | 5   | 4.4 | 4.2 | 2.7 | 2   | 1.8 | 0.6 | 0.4 | 0.5 | 0.1 | 0.1 |
| Thurrock                  | 22 | 52.7 | 19.2 | 14   | 11.9 | 9.1  | 8.8  | 7.2 | 5.4 | 4.9 | 4.2 | 2.2 | 2   | 1.7 | 0.6 | 0.3 | 0.3 | 0.1 | 0.1 |
| North Lincolnshire        | 21 | 53.2 | 19.3 | 14.8 | 12.4 | 9.1  | 9.7  | 7.6 | 4.9 | 5   | 4.1 | 2.9 | 2   | 2   | 0.7 | 0.3 | 0.4 | 0.1 | 0.1 |
| Cumbria                   | 21 | 52   | 17.5 | 13.9 | 12.1 | 11.3 | 9.4  | 7.2 | 4.3 | 4   | 3.2 | 2.6 | 1.9 | 1.7 | 0.6 | 0.4 | 0.4 | 0.1 | 0   |
| North Tyneside            | 21 | 55.4 | 22.1 | 13.5 | 11.7 | 11.1 | 8.9  | 6.8 | 6.2 | 3.8 | 3.6 | 1.9 | 1.8 | 1.5 | 0.6 | 0.6 | 0.4 | 0.1 | 0.1 |
| Norfolk                   | 21 | 50.6 | 14.9 | 12.9 | 11.1 | 11.7 | 8.8  | 6.6 | 4   | 4.5 | 3.3 | 3.3 | 1.8 | 1.6 | 0.6 | 0.4 | 0.2 | 0.1 | 0   |
| Lincolnshire              | 21 | 51.5 | 16.9 | 14.5 | 12.3 | 9.8  | 9.4  | 7.6 | 4.1 | 4.5 | 3.7 | 2.9 | 2   | 1.8 | 0.6 | 0.4 | 0.6 | 0.1 | 0   |
| Northumberland            | 21 | 53.5 | 20.1 | 14.3 | 12.5 | 10.1 | 9.1  | 7.2 | 4.9 | 4   | 3.5 | 2.4 | 2   | 1.6 | 0.5 | 0.5 | 0.3 | 0.1 | 0.1 |
| Redbridge                 | 20 | 51.2 | 16.8 | 14.4 | 12.7 | 10.1 | 8.9  | 7.6 | 4.5 | 4.4 | 4.2 | 2.2 | 2   | 1.8 | 0.5 | 0.4 | 0.2 | 0.1 | 0.1 |
| Herefordshire, County of  | 20 | 49   | 14.2 | 13.9 | 12.1 | 10.3 | 9.6  | 7   | 3.7 | 4.4 | 3.1 | 3   | 1.9 | 1.6 | 0.6 | 0.4 | 0.4 | 0.1 | 0   |
| Reading                   | 19 | 51.8 | 17.1 | 12   | 10.6 | 11.4 | 9.4  | 6.4 | 4.2 | 4.3 | 3.5 | 3.6 | 1.8 | 1.6 | 0.7 | 0.5 | 0.3 | 0.1 | 0.1 |
| Warrington                | 19 | 54.2 | 20   | 13.9 | 12.4 | 9.8  | 10.1 | 7.5 | 4.8 | 4.4 | 4.1 | 3.3 | 2   | 1.6 | 0.6 | 0.4 | 0.4 | 0.1 | 0.1 |
| Bedford                   | 19 | 49.9 | 15.9 | 13.4 | 11.5 | 9.8  | 9    | 6.9 | 4.2 | 5   | 3.7 | 2.9 | 1.9 | 1.8 | 0.5 | 0.4 | 0.2 | 0.1 | 0.1 |
| Stockport                 | 19 | 53.6 | 19.7 | 14   | 12.2 | 10.2 | 9.6  | 7.2 | 4.8 | 3.9 | 3.9 | 3.4 | 1.9 | 1.4 | 0.6 | 0.5 | 0.4 | 0   | 0   |
| Northamptonshire          | 19 | 52   | 17   | 12.6 | 11.2 | 10.8 | 8.9  | 6.4 | 4.4 | 4.1 | 3.6 | 3.8 | 1.8 | 1.6 | 0.6 | 0.4 | 0.6 | 0.1 | 0.1 |
| Nottinghamshire           | 19 | 51.4 | 17.5 | 13.3 | 11.3 | 9.6  | 8.7  | 6.7 | 4.6 | 4.2 | 3.6 | 3.6 | 1.8 | 1.6 | 0.5 | 0.4 | 0.7 | 0.1 | 0.1 |
| East Sussex               | 19 | 48.2 | 14.7 | 11.9 | 10.4 | 11.3 | 7.5  | 5.7 | 3.9 | 3.3 | 3.2 | 2.9 | 1.6 | 1.3 | 0.7 | 0.4 | 0.3 | 0.1 | 0   |
| Kent                      | 19 | 51.4 | 16.7 | 12.9 | 11   | 11.1 | 8.5  | 6.5 | 4.5 | 3.9 | 3.7 | 2.8 | 1.8 | 1.6 | 0.6 | 0.4 | 0.3 | 0.1 | 0   |
| Derbyshire                | 19 | 52.1 | 17.2 | 14.2 | 12.1 | 10.1 | 9.2  | 7.4 | 4.4 | 4.2 | 3.6 | 2.9 | 2   | 1.5 | 0.5 | 0.5 | 0.7 | 0.1 | 0.1 |
| Suffolk                   | 18 | 49.5 | 14.9 | 13.4 | 11.4 | 10.2 | 8.9  | 6.8 | 4.2 | 4.6 | 3.4 | 2.8 | 1.9 | 1.5 | 0.6 | 0.4 | 0.2 | 0.1 | 0   |
| Wandsworth                | 18 | 53.7 | 19.1 | 12.3 | 11.6 | 11.9 | 9.3  | 6.6 | 4.7 | 4.3 | 4   | 2.8 | 1.8 | 1.6 | 0.7 | 0.4 | 0.2 | 0.1 | 0   |
| Hillingdon                | 18 | 51.9 | 17.6 | 12.1 | 11   | 11.4 | 9.3  | 6.7 | 4.8 | 4.3 | 3.8 | 2.8 | 1.8 | 1.5 | 0.5 | 0.3 | 0.2 | 0.1 | 0.1 |
| Cheshire West and Chester | 18 | 52.8 | 18.4 | 13.2 | 11.6 | 11   | 9.6  | 6.8 | 4.6 | 4   | 3.5 | 3.3 | 1.9 | 1.5 | 0.6 | 0.4 | 0.4 | 0.1 | 0.1 |
| Milton Keynes             | 18 | 51.6 | 18   | 11.7 | 10.3 | 9.5  | 8.7  | 6.2 | 4.6 | 4.4 | 3.8 | 3.8 | 1.8 | 1.6 | 0.5 | 0.5 | 0.4 | 0   | 0.1 |
| Havering                  | 18 | 51.9 | 19.2 | 13.8 | 11.7 | 9.4  | 8.8  | 7.3 | 5.8 | 4   | 4.2 | 2.1 | 1.9 | 1.6 | 0.5 | 0.4 | 0.2 | 0.1 | 0   |
| Swindon                   | 18 | 52.5 | 18.3 | 13.3 | 11.5 | 9.8  | 9.4  | 7   | 5.2 | 4.5 | 3.8 | 2.8 | 1.9 | 1.6 | 0.5 | 0.3 | 0.7 | 0.1 | 0.1 |

|                              |    |      |      |      |      |      |      |     |     |     |     |     |     |     |     |     |     |     |     |
|------------------------------|----|------|------|------|------|------|------|-----|-----|-----|-----|-----|-----|-----|-----|-----|-----|-----|-----|
| Barnet                       | 18 | 49.9 | 15.7 | 13   | 11.9 | 10.7 | 8.9  | 6.9 | 3.9 | 4.1 | 3.6 | 2.6 | 1.9 | 1.6 | 0.5 | 0.3 | 0.2 | 0.1 | 0   |
| Somerset                     | 18 | 48.2 | 13.9 | 12.5 | 10.8 | 10.2 | 8.4  | 6.2 | 3.7 | 4   | 3   | 3.5 | 1.7 | 1.5 | 0.6 | 0.4 | 0.5 | 0.1 | 0.1 |
| Worcestershire               | 18 | 50   | 15.3 | 13.1 | 11.3 | 10.5 | 9    | 6.4 | 3.9 | 4   | 3.3 | 3.8 | 1.8 | 1.5 | 0.5 | 0.5 | 0.4 | 0.1 | 0.1 |
| Solihull                     | 17 | 49.8 | 16   | 12.9 | 10.8 | 9.9  | 9.5  | 6.5 | 4.2 | 4.1 | 3.3 | 3.7 | 1.8 | 1.5 | 0.5 | 0.5 | 0.4 | 0.1 | 0.1 |
| Essex                        | 17 | 51.2 | 16.6 | 13   | 11.1 | 10.3 | 8.7  | 6.5 | 4.6 | 4.5 | 3.6 | 3.3 | 1.8 | 1.6 | 0.6 | 0.4 | 0.3 | 0.1 | 0   |
| Devon                        | 17 | 48.9 | 13.8 | 12.7 | 11   | 10.9 | 8.6  | 6.4 | 3.7 | 3.8 | 2.9 | 3.5 | 1.8 | 1.5 | 0.6 | 0.4 | 0.5 | 0.1 | 0   |
| Shropshire                   | 17 | 50.4 | 15.9 | 14.1 | 11.9 | 10.2 | 9.4  | 7.1 | 4   | 4   | 3.3 | 3.1 | 1.9 | 1.5 | 0.5 | 0.3 | 0.4 | 0.1 | 0   |
| Staffordshire                | 16 | 51.9 | 15.9 | 13.4 | 11.3 | 10.4 | 8.9  | 6.7 | 4.1 | 4.1 | 3.4 | 4.8 | 1.8 | 1.6 | 0.5 | 0.5 | 0.4 | 0.1 | 0.1 |
| Bexley                       | 16 | 52   | 19.3 | 13.8 | 11.9 | 9.6  | 8.8  | 7.1 | 5.4 | 3.9 | 4.2 | 2.3 | 1.9 | 1.5 | 0.5 | 0.3 | 0.2 | 0.1 | 0   |
| East Riding of Yorkshire     | 16 | 50.6 | 17.6 | 14.4 | 12.5 | 9    | 9.3  | 7.4 | 4.4 | 4.3 | 3.7 | 2.2 | 2   | 1.8 | 0.6 | 0.4 | 0.3 | 0.1 | 0   |
| North Somerset               | 16 | 48.7 | 14.6 | 12.7 | 11.2 | 10.6 | 8.6  | 6.3 | 3.8 | 4   | 3.2 | 2.7 | 1.8 | 1.6 | 0.5 | 0.3 | 0.6 | 0.1 | 0.1 |
| Trafford                     | 15 | 54.2 | 19.7 | 14   | 12.5 | 10.9 | 10.4 | 7.4 | 4.9 | 4.2 | 4.2 | 2.5 | 2   | 1.5 | 0.5 | 0.5 | 0.4 | 0.1 | 0   |
| Poole                        | 15 | 49.1 | 15.6 | 12.5 | 10.8 | 10.7 | 9    | 6.3 | 3.9 | 4   | 3.5 | 2.3 | 1.7 | 1.5 | 0.8 | 0.5 | 0.6 | 0.1 | 0   |
| Bromley                      | 15 | 50.6 | 16.9 | 13.3 | 12   | 10.3 | 9.2  | 6.9 | 4.7 | 4   | 3.6 | 2.1 | 1.9 | 1.6 | 0.6 | 0.3 | 0.2 | 0.1 | 0   |
| Gloucestershire              | 15 | 49.8 | 14.7 | 12.7 | 11   | 11.2 | 8.8  | 6.6 | 4   | 4   | 3.3 | 2.8 | 1.8 | 1.5 | 0.6 | 0.5 | 0.6 | 0.1 | 0.1 |
| Warwickshire                 | 15 | 50.7 | 15.6 | 12.7 | 11   | 10.6 | 9.3  | 6.5 | 4   | 4.2 | 3.3 | 4.1 | 1.8 | 1.6 | 0.5 | 0.4 | 0.4 | 0.1 | 0.1 |
| Merton                       | 15 | 51.6 | 17.9 | 13.1 | 11.7 | 10.3 | 9.1  | 6.9 | 4.5 | 4   | 3.9 | 3   | 1.9 | 1.5 | 0.5 | 0.4 | 0.2 | 0.1 | 0   |
| North Yorkshire              | 15 | 50.6 | 15.9 | 14.5 | 12.7 | 10   | 9.7  | 7.6 | 3.9 | 4.2 | 3.4 | 2.9 | 2   | 1.7 | 0.5 | 0.4 | 0.3 | 0.1 | 0   |
| Sutton                       | 15 | 50.6 | 18.3 | 12.8 | 11.4 | 10.1 | 8.5  | 6.7 | 5.1 | 3.6 | 4   | 2.3 | 1.8 | 1.4 | 0.4 | 0.3 | 0.2 | 0   | 0.1 |
| Dorset                       | 14 | 47.5 | 13.5 | 12.2 | 10.5 | 10.7 | 8.3  | 6.1 | 3.7 | 3.6 | 3   | 3.4 | 1.7 | 1.5 | 0.6 | 0.4 | 0.5 | 0.1 | 0   |
| Harrow                       | 14 | 49.9 | 14.8 | 13.2 | 11.6 | 9.8  | 8.6  | 7.1 | 3.8 | 3.9 | 3.7 | 4.6 | 1.9 | 1.5 | 0.5 | 0.3 | 0.2 | 0.1 | 0   |
| Cheshire East                | 14 | 50.7 | 16.5 | 13   | 11.7 | 10.6 | 9.9  | 6.9 | 4.5 | 3.8 | 3.5 | 3.1 | 1.9 | 1.5 | 0.6 | 0.4 | 0.4 | 0.1 | 0   |
| West Sussex                  | 14 | 48.8 | 15   | 12.2 | 10.6 | 10.9 | 8.3  | 6.1 | 4   | 3.7 | 3.3 | 2.9 | 1.7 | 1.4 | 0.5 | 0.4 | 0.3 | 0.1 | 0   |
| Wiltshire                    | 13 | 48.1 | 14.1 | 12.5 | 11   | 10   | 8.5  | 6.3 | 4   | 4   | 3.2 | 3.2 | 1.8 | 1.5 | 0.6 | 0.4 | 0.5 | 0.1 | 0.1 |
| Cambridgeshire               | 13 | 49.5 | 14.9 | 12.3 | 11.1 | 10.6 | 9.2  | 6.3 | 4.2 | 4.5 | 3.3 | 3   | 1.8 | 1.5 | 0.5 | 0.5 | 0.2 | 0.1 | 0.1 |
| Leicestershire               | 12 | 50.4 | 15.4 | 13.3 | 11.5 | 9.8  | 9.2  | 7   | 4.1 | 4   | 3.5 | 4.1 | 1.9 | 1.5 | 0.6 | 0.4 | 0.6 | 0.1 | 0.1 |
| York                         | 12 | 51.7 | 18   | 14.3 | 12.7 | 9.8  | 10.2 | 7.6 | 4.8 | 4.1 | 3.8 | 2.3 | 2   | 1.7 | 0.5 | 0.4 | 0.3 | 0.1 | 0   |
| Central Bedfordshire         | 12 | 49.7 | 16.5 | 13   | 11.3 | 9.6  | 8.8  | 6.5 | 4.6 | 4.6 | 3.6 | 2.1 | 1.9 | 1.7 | 0.5 | 0.5 | 0.3 | 0   | 0.1 |
| Hertfordshire                | 12 | 50.8 | 16.6 | 12.6 | 11.3 | 10.5 | 9.3  | 6.5 | 4.5 | 4.4 | 3.7 | 2.7 | 1.8 | 1.5 | 0.5 | 0.4 | 0.2 | 0.1 | 0.1 |
| Bath and North East Somerset | 12 | 47.8 | 14.4 | 12.5 | 11.1 | 10.6 | 9.1  | 6.4 | 4.3 | 3.8 | 3.1 | 2.2 | 1.8 | 1.4 | 0.6 | 0.4 | 0.6 | 0.1 | 0.1 |
| Hampshire                    | 12 | 49.2 | 15   | 12.3 | 10.6 | 10.8 | 8.7  | 6.2 | 4.4 | 3.9 | 3.4 | 2.5 | 1.8 | 1.5 | 0.5 | 0.4 | 0.3 | 0.1 | 0   |
| Oxfordshire                  | 12 | 48.6 | 14.8 | 11.6 | 10   | 11.1 | 8.6  | 5.8 | 4   | 4   | 3.2 | 3   | 1.7 | 1.4 | 0.5 | 0.4 | 0.3 | 0.1 | 0.1 |
| South Gloucestershire        | 11 | 47.8 | 14.8 | 12.2 | 10.8 | 9.8  | 9.3  | 6.4 | 4.3 | 3.9 | 3.2 | 2.4 | 1.8 | 1.5 | 0.6 | 0.3 | 0.6 | 0.1 | 0   |
| Kingston upon Thames         | 11 | 50.1 | 16.3 | 12.4 | 11.6 | 11.1 | 9.2  | 6.6 | 4.2 | 3.8 | 3.8 | 2.7 | 1.8 | 1.6 | 0.5 | 0.3 | 0.2 | 0.1 | 0   |
| Bracknell Forest             | 10 | 49.2 | 17.1 | 12   | 10.7 | 9.2  | 9    | 6.1 | 4.3 | 4.1 | 3.6 | 2.3 | 1.8 | 1.6 | 0.7 | 0.5 | 0.4 | 0.1 | 0.1 |
| West Berkshire               | 10 | 48.4 | 15.7 | 11.4 | 10   | 10   | 9.2  | 5.8 | 4.6 | 4.2 | 3.3 | 2.3 | 1.7 | 1.5 | 0.5 | 0.4 | 0.3 | 0   | 0   |
| Richmond upon Thames         | 10 | 49.2 | 15.3 | 11.1 | 10.2 | 12   | 8.7  | 5.8 | 3.8 | 3.6 | 3.6 | 3   | 1.6 | 1.4 | 0.6 | 0.3 | 0.1 | 0.1 | 0   |
| Buckinghamshire              | 10 | 47.9 | 13.4 | 11.7 | 10.3 | 10.6 | 8.5  | 6   | 3.9 | 3.7 | 3.2 | 3.5 | 1.7 | 1.5 | 0.6 | 0.5 | 0.3 | 0.1 | 0   |
| Rutland                      | 10 | 49.7 | 13.8 | 13.8 | 12.3 | 10.1 | 9.7  | 7.6 | 3.6 | 3.7 | 3.5 | 4.1 | 2   | 2.3 | 0.2 | 0.5 | 0.5 | 0.1 | 0.1 |
| Surrey                       | 9  | 48.4 | 14.6 | 11.6 | 10.3 | 10.7 | 8.7  | 5.9 | 4.3 | 3.7 | 3.4 | 2.7 | 1.7 | 1.4 | 0.6 | 0.4 | 0.3 | 0.1 | 0.1 |

|                        |   |      |      |      |      |      |     |     |     |     |     |     |     |     |     |     |     |     |     |
|------------------------|---|------|------|------|------|------|-----|-----|-----|-----|-----|-----|-----|-----|-----|-----|-----|-----|-----|
| Windsor and Maidenhead | 9 | 50.3 | 15.8 | 12.7 | 10.9 | 10.3 | 9.5 | 6.7 | 4.3 | 4.2 | 3.7 | 3   | 1.9 | 1.6 | 0.6 | 0.4 | 0.3 | 0.1 | 0.1 |
| Wokingham              | 6 | 47.3 | 13.6 | 11.8 | 10.4 | 9.5  | 9   | 6   | 4   | 4   | 3.3 | 3.6 | 1.7 | 1.5 | 0.4 | 0.5 | 0.3 | 0   | 0.1 |

 Statistically significantly lower than the England mean  
 Statistically significantly higher than the England mean

**Appendix Figure 7.** Annualised percentage change in all-cause age-standardised years of life lost (YLLs) rate over two time periods (2000-2009 and 2010-2016) by UK country and English Upper Tier Local Authorities (UTLA).

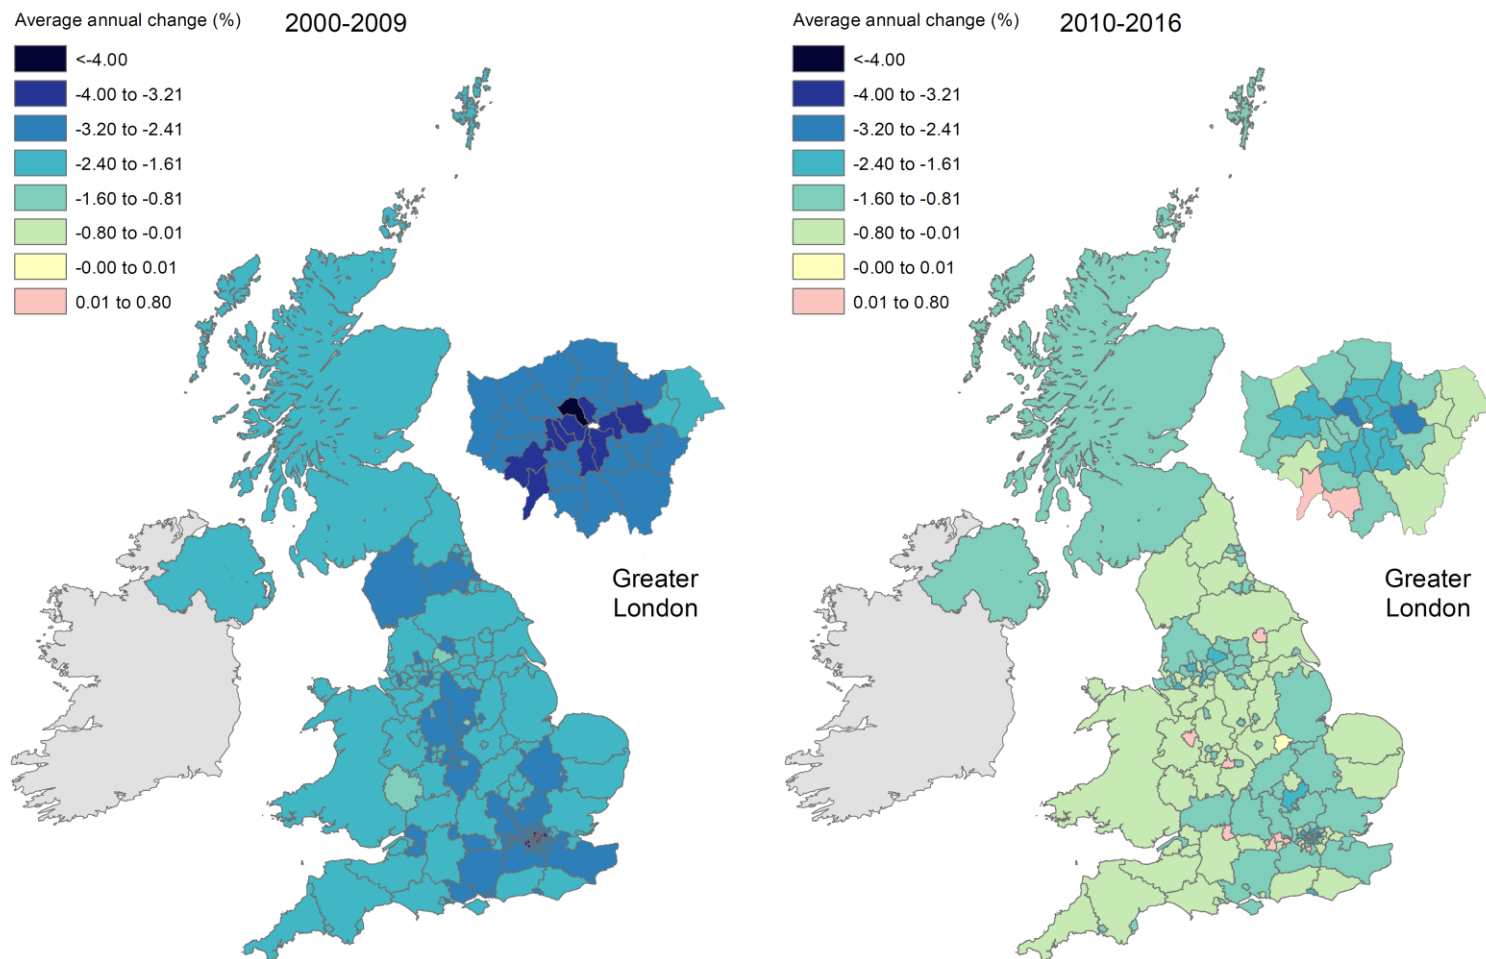

Data for the City of London and Isles of Scilly not available. Source: Institute for Health Metrics and Evaluation 2017. Contains National Statistics data © Crown copyright and database right 2017. Ireland outline © 2018 GADM. NISRA: Website: [www.nisra.gov.uk](http://www.nisra.gov.uk). Contains NRS data © Crown copyright and database right 2017. Contains OS data © Crown copyright and database right 2017.

**Appendix Figure 8:** Absolute change in death rate per 100,000 population over time since 1990 by age group, UK

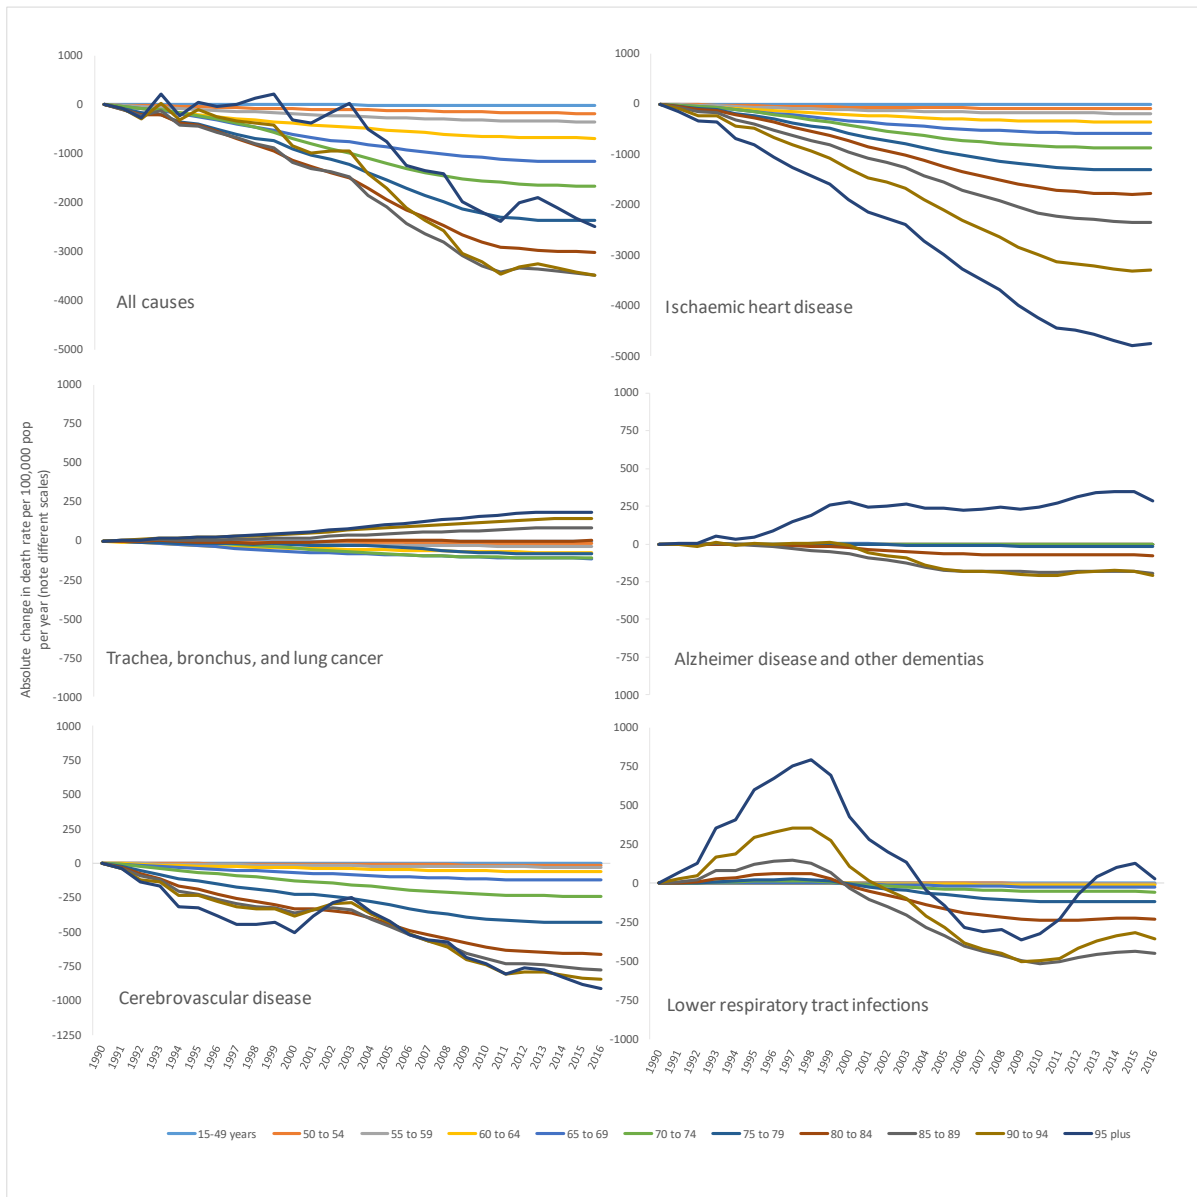

**Appendix Figure 9:** Absolute change in years of life lost (YLL) rate per 100,000 population over time since 1990 by age group, UK

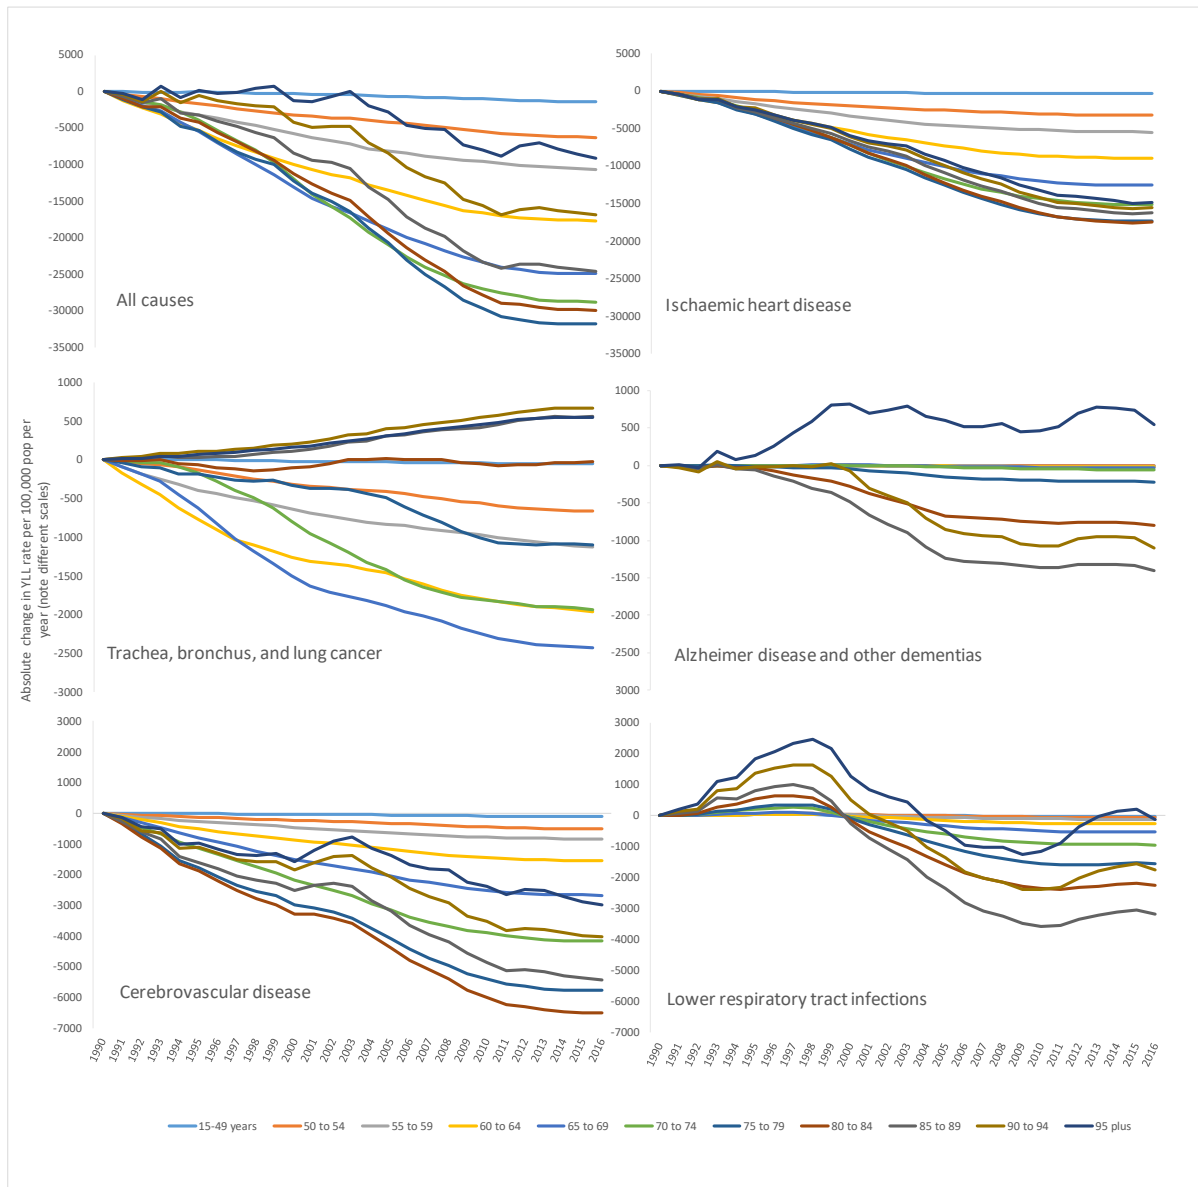



**Appendix Figure 10:** Mean annual change in attributable risk for all-cause age-standardised years of life lost (YLLs) rate per 100,000 population over three time periods, 1990-2000, 2000-2010, and 2010-2016 ranked by the highest rate, England

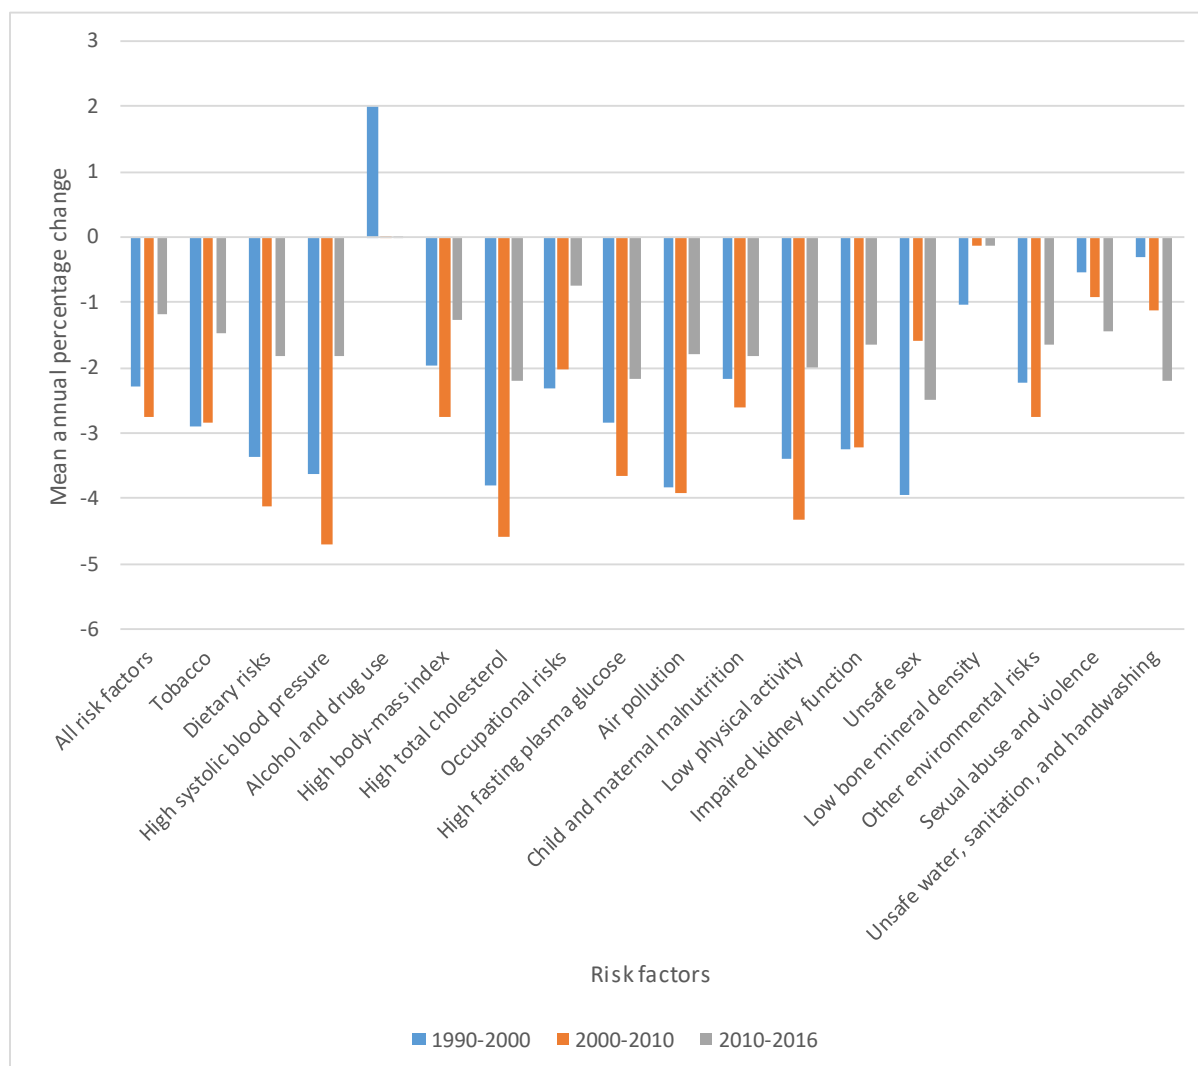

**Appendix Figure 11:** Mean annualised percentage change in all-cause age-standardised years of life lost (YLLs) over three time periods compared to Index of Multiple Deprivation (IMD) score, English Upper Tier Local Authorities (UTLAs) for both sexes combined

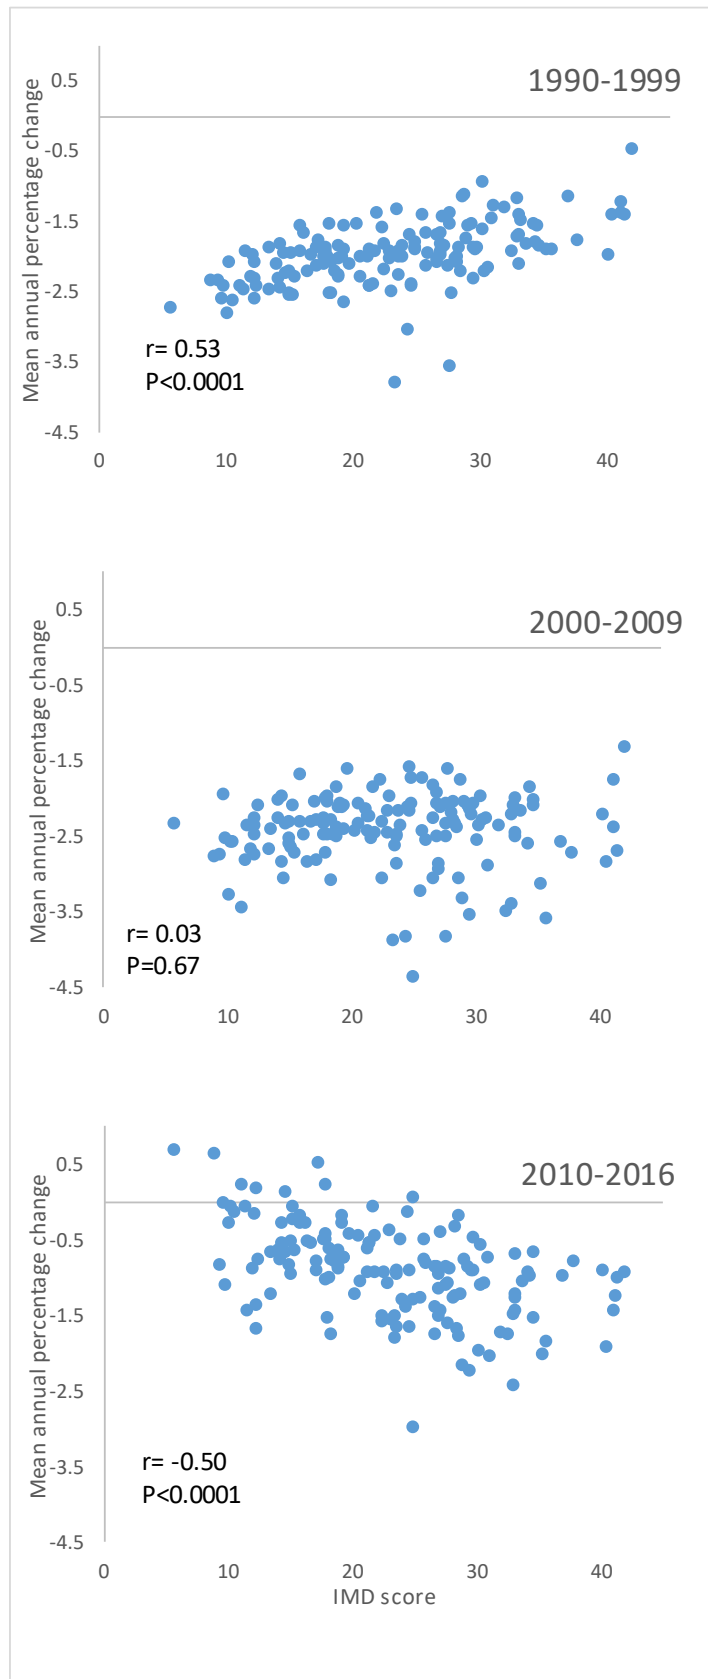

**Appendix Figure 12:** Mean annualised percentage change in all-cause age-standardised years of life lost (YLLs) rate per 100,000 population for the most affluent 10% and the least affluent 10% Upper Tier Local Authorities (UTLAs), England, both sexes, 1990 to 2016

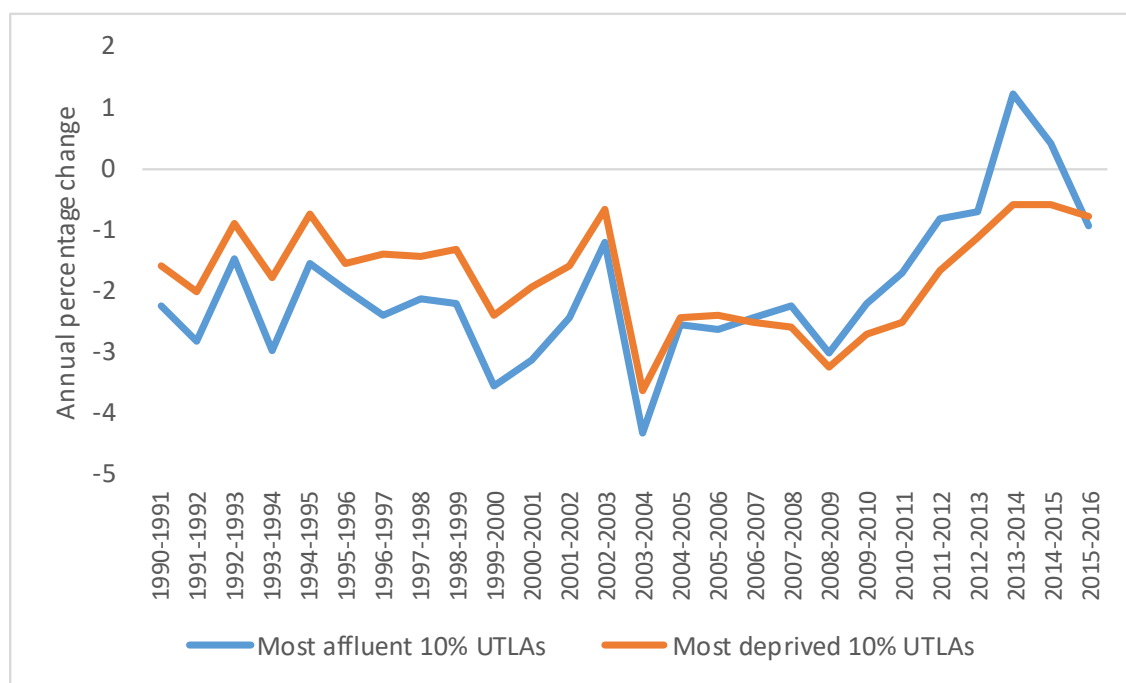

**Appendix Figure 13:** Age standardised years lived with disability (YLDs) rate per 100,000 population for the 10 causes with the highest YLD burden by Global Burden of Disease level, United Kingdom both sexes combined, 2016

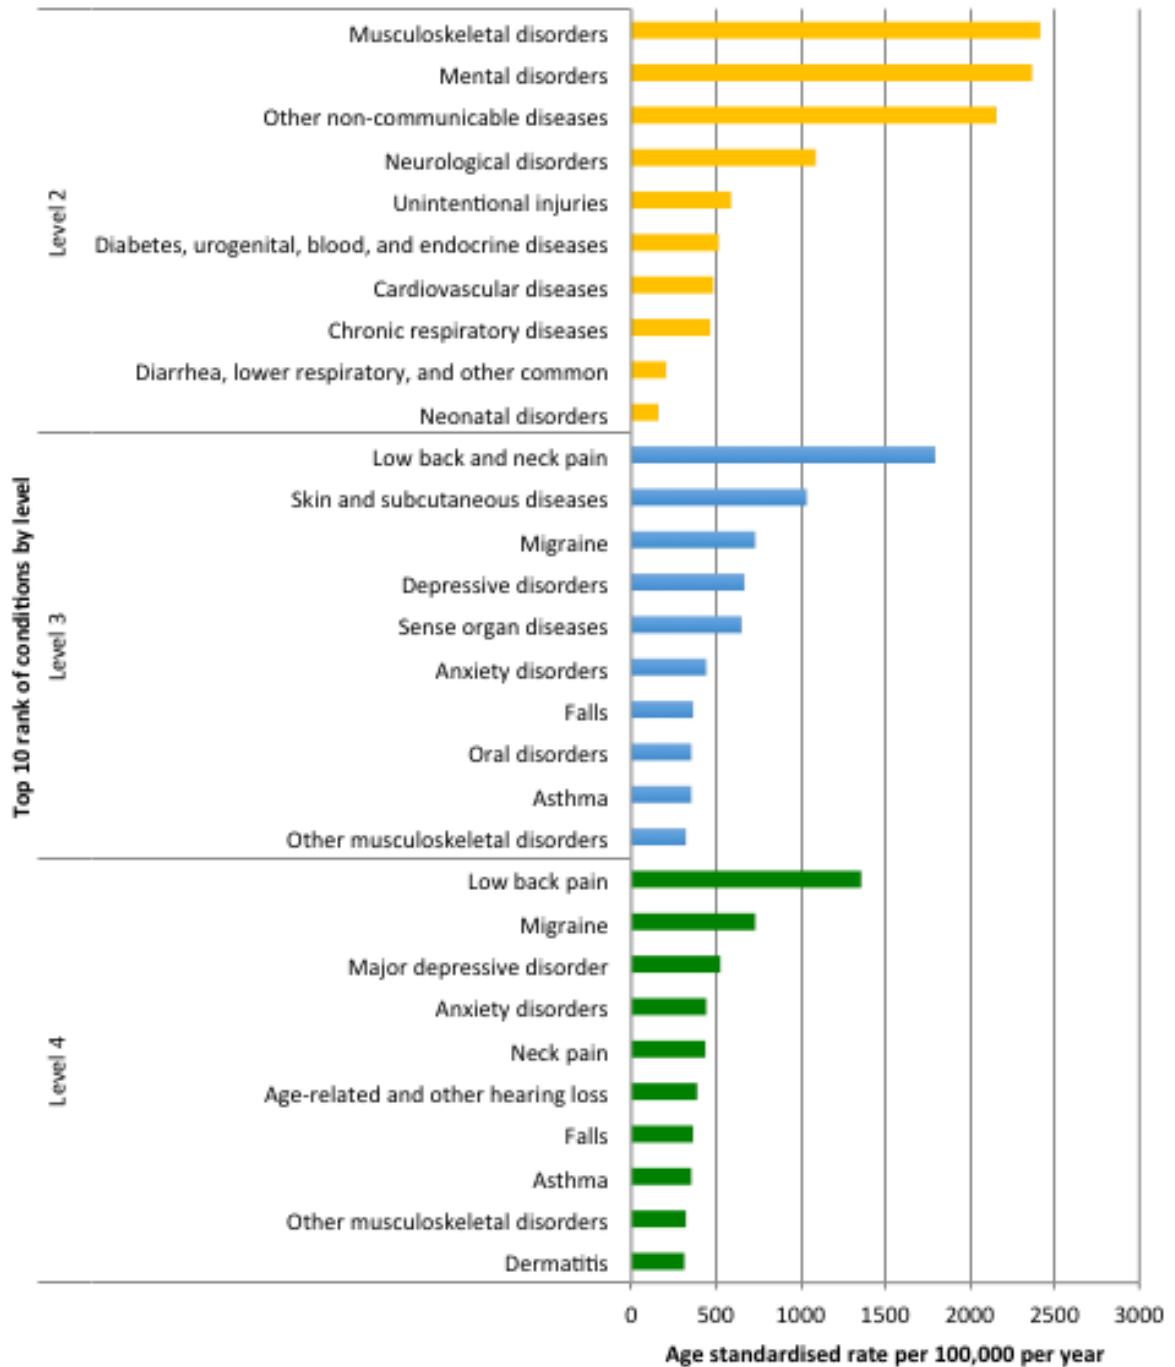

## Data source identification and adjustment

Estimation of YLDs has eight major components. These are described more completely in the appendix of the GBD 2016 paper on non-fatal estimates<sup>i</sup>, but the first two components include identifying and adjusting data in order to estimate prevalence and incidence for specific causes and sequelae for each geographic area.

Each cause has its own case definition and diagnostic criteria for identifying and accepting data that can be used in the modelling process. Although specific to each cause the general process includes:

- a. Systematic selection of studies. These are undertaken for each cause and search terms are available in the appendix of the GBD paper on non-fatal estimates<sup>ii</sup>. Inclusion and exclusion criteria were applied to the studies returned.
- b. In addition to study searches, additional data inputs for each cause were included depending on relevance and acceptability. Surveys, registry data, hospital data and surveillance system outputs are examples of this data. Generally, where case definition relevant individual-level data was available, this superseded data from study sources. Data sources included in models include country specific data, as well as data from non-country specific sources.

Prior to estimation of prevalence and incidence, many of the data sources undergo some form of adjustment and these are specific to the cause in question. For example, where different physiological measures are reported that differ from the case definition, then some adjustment to the reference definition will be undertaken. Age and sex splitting of the data is also carried on data sources where the required sex or age-groups are either not reported or too broad.

For example, Diabetes mellitus in the GBD 2016 was defined using a case definition of fasting plasma glucose (FPG) >126 mg/dL (7 mmol/L), or being on treatment for diabetes. However, the criteria accepted other measures of blood sugar (haemoglobin A1c [HbA1c], oral glucose tolerance test, or post prandial glucose test) to define diabetes. Data source input searching included a) systematic study searches; b) systematic search of the Global Health Data Exchange (GHDx) for survey programs and national surveys, as well as longitudinal studies tagged with either FPG or Diabetes mellitus; and c) datasets from other leaders in the field. The four data inputs include estimates of diabetes within a population, estimates of mean FPG, individual level data measured from surveys and Insurance claims data from the US. England specific data inputs accepted for the diabetes model include country-representative survey data (from the Health Survey for England) of blood measures and a number of published papers.

The data adjustment processes for diabetes included time, age and sex splitting of data sources, as well as adjustments to data points with alternative case-definitions in order to standardise data to the reference definition. For England survey data, blood glucose measures are reported as HbA1c. A reference of HbA1c of >6.5 was assumed to be the threshold equivalent to the GBD FPG case definition of diabetes.

The case definition for COPD is defined in GBD 2016 as in the Global Initiative for Chronic Obstructive Lung Disease (GOLD) classification: a measurement of  $<0.7$  FEV<sub>1</sub>/FVC (one second of forceful exhalation/total forced expiration) on spirometry after bronchodilation<sup>iii</sup>. This matches to a partial definition in the National Institute for Health and Care Excellence (NICE) guidelines used in England and Wales 101<sup>iv</sup>, but NICE guidelines state where FEV<sub>1</sub> is  $\geq 80\%$  predicted normal a diagnosis of COPD should only be made in the presence of respiratory symptoms.

A systematic selection of studies were included using reported measures of COPD, excluding studies with smokers. An additional criteria for acceptance also included surveys, but only where COPD was reported using spirometry data and outcomes were within a plausible range. Where an alternative case definition was reported in accepted data sources, these were adjusted to GOLD classifications based on reference material linking definitions. The only England-specific data accepted with the search selection included one study based on measures taken from the Health Survey for England.

---

<sup>i</sup> GBD 2016. Disease and Injury Incidence and Prevalence Collaborators. Global, regional, and national incidence, prevalence, and years lived with disability for 328 diseases and injuries for 195 countries, 1990–2016: a systematic analysis for the Global Burden of Disease Study 2016. *The Lancet*. Volume 390, No. 10100, p1211–1259, 16 September 2017

<sup>ii</sup> GBD 2016. Disease and Injury Incidence and Prevalence Collaborators. Global, regional, and national incidence, prevalence, and years lived with disability for 328 diseases and injuries for 195 countries, 1990–2016: a systematic analysis for the Global Burden of Disease Study 2016. *The Lancet*. Volume 390, No. 10100, p1211–1259, 16 September 2017

<sup>iii</sup> GBD 2016. Disease and Injury Incidence and Prevalence Collaborators. Global, regional, and national incidence, prevalence, and years lived with disability for 328 diseases and injuries for 195 countries, 1990–2016: a systematic analysis for the Global Burden of Disease Study 2016. *The Lancet*. Volume 390, No. 10100, p1211–1259, 16 September 2017

<sup>iv</sup> NICE 2010. NICE Guideline 101: Chronic obstructive pulmonary disease in over 16s: diagnosis and management. <https://www.nice.org.uk/guidance/cg101/chapter/Working-definition-of-COPD>
